# Supplementary material for: Altered triglyceride and phospholipid metabolism predates the diagnosis of gestational diabetes in obese pregnancy
Source: Royal Society of Chemistry journal article supplement (doi:10.1039/c9mo00117d), 2019-10-10
Supplement: c9mo00117d1.pdf [file c9mo00117d1.pdf]

## Supplementary information

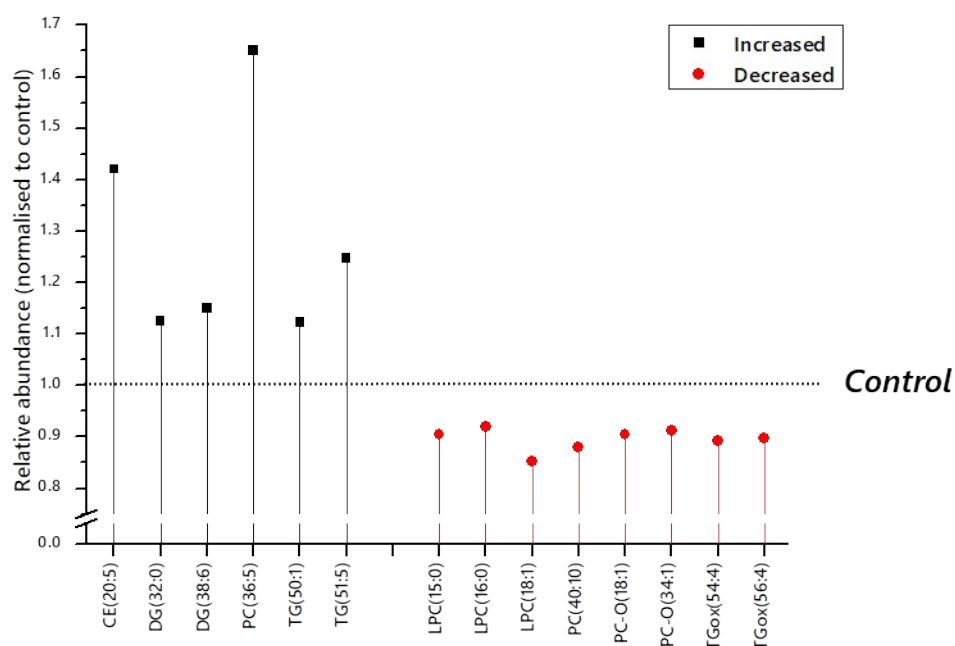

Fig. S1. Normalised relative abundance of lipids identified as candidate biomarkers in the circulation of obese pregnant women at ~17w gestation. Candidate biomarkers discovery consisted of a sparse Partial Least Squares Discriminant Analysis followed by student's T-test (Bonferroni corrected) The control group, against which the values shown were normalised, were an obese but otherwise typically healthy group (meta-data in Table 1).

| Lipid Class                      | Isoform                                                             |
|----------------------------------|---------------------------------------------------------------------|
| Cholesteryl ester                | CE(18:0-d <sub>6</sub> )                                            |
| Ceramide                         | C16-d <sub>31</sub> Ceramide                                        |
| Fatty acid                       | C15:0-d <sub>29</sub> FA                                            |
| Fatty acid                       | C17:0-d <sub>33</sub> FA                                            |
| Fatty acid                       | C20:0-d <sub>39</sub> FA                                            |
| <i>lyso</i> -Phosphatidylcholine | <i>lyso</i> -PC(C14:0)-d <sub>42</sub>                              |
| Phosphatidic acid                | PA(C16:0-d <sub>31</sub> /C18:1), Na <sup>+</sup> salt              |
| Phosphatidylcholine              | PC(C16:0-d <sub>31</sub> /C18:1)                                    |
| Phosphatidylethanolamine         | PE(C16:0-d <sub>31</sub> /C18:1)                                    |
| Phosphatidylglycerol             | PG(C16:0-d <sub>31</sub> /C18:1), Na <sup>+</sup> salt              |
| Phosphatidylinositol             | PI(C16:0-d <sub>31</sub> /C18:1), NH <sub>4</sub> <sup>+</sup> salt |
| Phosphatidylserine               | PS(C16:0-d <sub>62</sub> ), Na <sup>+</sup> salt                    |
| Sphingomyelin                    | SM(C16:0-d <sub>31</sub> )                                          |
| Triglyceride                     | TG(45:0-d <sub>29</sub> )                                           |
| Triglyceride                     | TG(48:0-d <sub>31</sub> )                                           |
| Triglyceride                     | TG(54:0-d <sub>35</sub> )                                           |

Table S1. List of internal standards used for lipid profiling in the present study.

| Candidate biomarker | Not diagnosed | Diagnosed | <i>p</i> -Value |
|---------------------|---------------|-----------|-----------------|
| CE(20:5)            | 5.159         | 7.328     | 0.0015          |
| DG(32:0)            | 3.760         | 4.228     | 0.0004          |
| DG(38:6)            | 4.055         | 4.663     | 0.0013          |
| LPC(15:0)           | 3.530         | 3.193     | 0.0016          |
| LPC(16:0)           | 5.985         | 5.508     | 0.0002          |
| LPC(18:1)           | 6.309         | 5.382     | 3.46E-08        |
| PC(36:5)            | 2.520         | 4.161     | 0.0003          |
| PC(40:10)           | 2.870         | 2.527     | 0.0015          |
| PC-O(18:1)          | 3.558         | 3.218     | 0.0005          |
| PC-O(34:1)          | 5.238         | 4.784     | 0.0006          |
| TG(50:1)            | 3.692         | 4.143     | 0.0005          |
| TG(51:5)            | 2.820         | 3.519     | 0.0015          |
| TGox(54:4)          | 3.139         | 2.801     | 1.77E-05        |
| TGox(56:4)          | 3.122         | 2.802     | 0.0002          |

Table S2. Candidate biomarkers identified using a combination of supervised multi-variate analysis followed by student's T-Test. Values were normalised against that of the control (healthy/non-diagnosed) group. Bonferroni corrected p value threshold was 0.0021, based on 565 independent variables. Relative abundance of lipids in participants diagnosed with GDM shown in Fig. S1.
