# Supplementary material for: Altered triglyceride and phospholipid metabolism predates the diagnosis of gestational diabetes in obese pregnancy
Source: Royal Society of Chemistry journal article supplement (doi:10.1039/c9mo00117d), 2019-10-10
Supplement: c9mo00117d2.xlsx [file c9mo00117d2.xlsx]

## Sheet: SI Table from datasheet
	FDR	0.0020998	Not adjusted									Adjusted
1	Var.	pV				OR	SE	z	P>|z|	[95% Conf. Interval]					OR	SE	z	P>|z|	[95% Conf. Interval]
12	TG_oxid(55:0)+Cl-37 & TG_oxid(54:4)+Acetate	1.76675e-05	.logisticgdm01a1	+ve	notadj	0.741258	0.0585748	-3.79	0	0.634903	0.86543	.logisticgdm01a1matbmimatagei.sex12i.PET12i.ethnicityi.paritycodei.intervention	a1	adj	0.735271	0.0599755	-3.77	0	0.626636	0.862739
54	TG_oxid(57:0)+Cl-37 & TG_oxid(56:4)+Acetate	0.000156063	.logisticgdm01a2	+ve	notadj	0.793038	0.057897	-3.18	0.001	0.687307	0.915035	.logisticgdm01a2matbmimatagei.sex12i.PET12i.ethnicityi.paritycodei.intervention	a2	adj	0.787864	0.0589799	-3.18	0.001	0.680347	0.912374
96	PC(36:5)_[M+Cl]1-	0.000277106	.logisticgdm01a3	+ve	notadj	1.05713	0.0165278	3.55	0	1.02523	1.09003	.logisticgdm01a3matbmimatagei.sex12i.PET12i.ethnicityi.paritycodei.intervention	a3	adj	1.04673	0.0174581	2.74	0.006	1.01307	1.08152
138	PC-O(18:1)_[M+OAC]1- & LPS(22:0)_[M-H]1- & PIP(52:4)	0.000488124	.logisticgdm01a4	+ve	notadj	0.818836	0.0494011	-3.31	0.001	0.727517	0.921617	.logisticgdm01a4matbmimatagei.sex12i.PET12i.ethnicityi.paritycodei.intervention	a4	adj	0.850853	0.0528017	-2.6	0.009	0.75341	0.9609
180	TG_oxid(59:2)+Cl-37 & TG_oxid(58:6)+Acetate	0.000832095	.logisticgdm01a5	+ve	notadj	0.870334	0.0389391	-3.1	0.002	0.797265	0.950099	.logisticgdm01a5matbmimatagei.sex12i.PET12i.ethnicityi.paritycodei.intervention	a5	adj	0.863294	0.0400461	-3.17	0.002	0.788268	0.945462
222	PC(40:10) & PS(44:9)	0.00151666	.logisticgdm01a6	+ve	notadj	0.842572	0.0454354	-3.18	0.001	0.758065	0.9365	.logisticgdm01a6matbmimatagei.sex12i.PET12i.ethnicityi.paritycodei.intervention	a6	adj	0.845227	0.0466213	-3.05	0.002	0.758617	0.941725
264	LPC(15:0)_[M+OAC]1- & PIP(46:2)	0.00156286	.logisticgdm01a7	+ve	notadj	0.839646	0.0487002	-3.01	0.003	0.749421	0.940734	.logisticgdm01a7matbmimatagei.sex12i.PET12i.ethnicityi.paritycodei.intervention	a7	adj	0.855919	0.0505479	-2.63	0.008	0.762365	0.960952
306	TG_oxid(59:1)+Cl-37 & TG_oxid(58:5)+Acetate	0.00209062	.logisticgdm01a8	+ve	notadj	0.868876	0.0506742	-2.41	0.016	0.775023	0.974095	.logisticgdm01a8matbmimatagei.sex12i.PET12i.ethnicityi.paritycodei.intervention	a8	adj	0.860565	0.0516617	-2.5	0.012	0.76504	0.968018
348	TG_oxid(48:2)+Cl-37 & TG_oxid(47:6)+Acetate	0.00227966	.logisticgdm01a9	+ve	notadj	0.746533	0.0703386	-3.1	0.002	0.620652	0.897945	.logisticgdm01a9matbmimatagei.sex12i.PET12i.ethnicityi.paritycodei.intervention	a9	adj	0.721644	0.0700113	-3.36	0.001	0.596682	0.872778
390	PI(36:1)	0.00230479	.logisticgdm01a10	+ve	notadj	0.78104	0.0669532	-2.88	0.004	0.660246	0.923934	.logisticgdm01a10matbmimatagei.sex12i.PET12i.ethnicityi.paritycodei.intervention	a10	adj	0.811156	0.0722777	-2.35	0.019	0.681174	0.96594
432	PC(36:6)_[M+OAC]1- & PS(40:5)	0.00253417	.logisticgdm01a11	+ve	notadj	0.835067	0.0540256	-2.79	0.005	0.735618	0.947962	.logisticgdm01a11matbmimatagei.sex12i.PET12i.ethnicityi.paritycodei.intervention	a11	adj	0.860075	0.0569648	-2.28	0.023	0.755369	0.979295
474	LPE(18:2)_[M-H]1-	0.00305656	.logisticgdm01a12	+ve	notadj	0.894571	0.0376741	-2.65	0.008	0.823696	0.971544	.logisticgdm01a12matbmimatagei.sex12i.PET12i.ethnicityi.paritycodei.intervention	a12	adj	0.886158	0.0390388	-2.74	0.006	0.812853	0.966073
516	PE(34:0)_[M-H]1-	0.00403487	.logisticgdm01a13	+ve	notadj	1.21496	0.0696872	3.39	0.001	1.08577	1.35952	.logisticgdm01a13matbmimatagei.sex12i.PET12i.ethnicityi.paritycodei.intervention	a13	adj	1.17492	0.0693288	2.73	0.006	1.04661	1.31898
558	PE-O(36:5)_[M-H]1-	0.00513468	.logisticgdm01a14	+ve	notadj	1.17764	0.0613039	3.14	0.002	1.06342	1.30414	.logisticgdm01a14matbmimatagei.sex12i.PET12i.ethnicityi.paritycodei.intervention	a14	adj	1.15301	0.0647318	2.54	0.011	1.03287	1.28713
600	PI(38:5)	0.00610803	.logisticgdm01a15	+ve	notadj	0.807088	0.0639326	-2.71	0.007	0.691025	0.942644	.logisticgdm01a15matbmimatagei.sex12i.PET12i.ethnicityi.paritycodei.intervention	a15	adj	0.797712	0.0660256	-2.73	0.006	0.678255	0.938207
642	PC(38:5)_[M+Cl]1-	0.00668758	.logisticgdm01a16	+ve	notadj	1.08985	0.0315112	2.98	0.003	1.0298	1.15339	.logisticgdm01a16matbmimatagei.sex12i.PET12i.ethnicityi.paritycodei.intervention	a16	adj	1.09533	0.0313977	3.18	0.001	1.03549	1.15863
684	PC(35:1)_[M+OAC]1- / PS(39:0)_[M-H]1-	0.00671401	.logisticgdm01a17	+ve	notadj	0.79293	0.0778071	-2.36	0.018	0.654199	0.961081	.logisticgdm01a17matbmimatagei.sex12i.PET12i.ethnicityi.paritycodei.intervention	a17	adj	0.832219	0.0850605	-1.8	0.072	0.681141	1.01681
726	PE-P_40:6)_[M-H]1- & LBPA(18:1(9Z)/18:1(9Z)	0.00677586	.logisticgdm01a18	+ve	notadj	1.15657	0.0575219	2.92	0.003	1.04915	1.27499	.logisticgdm01a18matbmimatagei.sex12i.PET12i.ethnicityi.paritycodei.intervention	a18	adj	1.14729	0.063787	2.47	0.013	1.02884	1.27938
768	LPE(18:1)_[M-H]1-	0.00757857	.logisticgdm01a19	+ve	notadj	0.864032	0.0451901	-2.79	0.005	0.779849	0.957302	.logisticgdm01a19matbmimatagei.sex12i.PET12i.ethnicityi.paritycodei.intervention	a19	adj	0.883011	0.0475484	-2.31	0.021	0.794567	0.9813
810	PG(36:2)	0.00765387	.logisticgdm01a20	+ve	notadj	1.19326	0.0753952	2.8	0.005	1.05428	1.35058	.logisticgdm01a20matbmimatagei.sex12i.PET12i.ethnicityi.paritycodei.intervention	a20	adj	1.16757	0.0788881	2.29	0.022	1.02275	1.33289
852	TG_oxid(57:1)+Cl-37 & TG_oxid(56:5)+Acetate	0.00792056	.logisticgdm01a21	+ve	notadj	0.868101	0.0560217	-2.19	0.028	0.764961	0.985148	.logisticgdm01a21matbmimatagei.sex12i.PET12i.ethnicityi.paritycodei.intervention	a21	adj	0.849442	0.0571637	-2.42	0.015	0.744478	0.969205
894	LPS(22:1)_[M-H]1- & LPC(18:2)_[M+OAC]1- & PIP(52:6)	0.00793213	.logisticgdm01a22	+ve	notadj	0.880711	0.0482827	-2.32	0.021	0.790986	0.980615	.logisticgdm01a22matbmimatagei.sex12i.PET12i.ethnicityi.paritycodei.intervention	a22	adj	0.879122	0.0492914	-2.3	0.022	0.787632	0.98124
936	SM(33:1)_[M+OAC]1- & TG_oxid(40:0)+Cl-37	0.0084536	.logisticgdm01a23	+ve	notadj	0.803826	0.07225	-2.43	0.015	0.673991	0.958673	.logisticgdm01a23matbmimatagei.sex12i.PET12i.ethnicityi.paritycodei.intervention	a23	adj	0.783905	0.0730113	-2.61	0.009	0.653107	0.940898
978	SM(39:2)_[M+OAC]1- & TG_oxid(46:1)+Cl-37 & TG_oxid(45:5)+Acetate	0.00853312	.logisticgdm01a24	+ve	notadj	0.765716	0.0738592	-2.77	0.006	0.633816	0.925066	.logisticgdm01a24matbmimatagei.sex12i.PET12i.ethnicityi.paritycodei.intervention	a24	adj	0.747301	0.0740525	-2.94	0.003	0.615386	0.907495
1020	TG_oxid(54:7)+Cl-35	0.00912699	.logisticgdm01a25	+ve	notadj	1.1508	0.0548227	2.95	0.003	1.04821	1.26343	.logisticgdm01a25matbmimatagei.sex12i.PET12i.ethnicityi.paritycodei.intervention	a25	adj	1.16474	0.0578595	3.07	0.002	1.05668	1.28385
1062	PC(40:6)_[M+OAC]1- & PS(44:5)_[M-H]1-	0.00970225	.logisticgdm01a26	+ve	notadj	1.23155	0.101458	2.53	0.011	1.04792	1.44736	.logisticgdm01a26matbmimatagei.sex12i.PET12i.ethnicityi.paritycodei.intervention	a26	adj	1.1602	0.102493	1.68	0.093	0.975752	1.37953
1104	PI(34:1)	0.0139885	.logisticgdm01a27	+ve	notadj	0.864953	0.0577942	-2.17	0.03	0.758783	0.98598	.logisticgdm01a27matbmimatagei.sex12i.PET12i.ethnicityi.paritycodei.intervention	a27	adj	0.881084	0.0602295	-1.85	0.064	0.770602	1.0074
1146	TG_oxid(55:8)+Cl-35	0.0145188	.logisticgdm01a28	+ve	notadj	0.930227	0.0299226	-2.25	0.025	0.87339	0.990762	.logisticgdm01a28matbmimatagei.sex12i.PET12i.ethnicityi.paritycodei.intervention	a28	adj	0.945585	0.0307566	-1.72	0.085	0.887184	1.00783
1188	PE(40:6)_[M-H]1-	0.0157038	.logisticgdm01a29	+ve	notadj	1.24072	0.119285	2.24	0.025	1.02763	1.49799	.logisticgdm01a29matbmimatagei.sex12i.PET12i.ethnicityi.paritycodei.intervention	a29	adj	1.13703	0.11424	1.28	0.201	0.933788	1.3845
1230	PA(47:9) & TG_oxid(48:9)+Cl-35	0.016192	.logisticgdm01a30	+ve	notadj	1.08873	0.0392298	2.36	0.018	1.01449	1.1684	.logisticgdm01a30matbmimatagei.sex12i.PET12i.ethnicityi.paritycodei.intervention	a30	adj	1.06766	0.0405374	1.72	0.085	0.991092	1.15014
1272	TG(46:8)+Cl-35	0.0170936	.logisticgdm01a31	+ve	notadj	1.07309	0.0308287	2.46	0.014	1.01434	1.13525	.logisticgdm01a31matbmimatagei.sex12i.PET12i.ethnicityi.paritycodei.intervention	a31	adj	1.08464	0.0325921	2.7	0.007	1.0226	1.15044
1314	PC(40:6)_[M+Cl]1-	0.0199148	.logisticgdm01a32	+ve	notadj	1.05628	0.0225554	2.56	0.01	1.01299	1.10143	.logisticgdm01a32matbmimatagei.sex12i.PET12i.ethnicityi.paritycodei.intervention	a32	adj	1.05477	0.0238836	2.35	0.019	1.00898	1.10264
1356	PC(36:5)_[M+OAC]1- & PS(40:4)	0.0199321	.logisticgdm01a33	+ve	notadj	1.08696	0.038942	2.33	0.02	1.01325	1.16603	.logisticgdm01a33matbmimatagei.sex12i.PET12i.ethnicityi.paritycodei.intervention	a33	adj	1.06349	0.0402963	1.62	0.104	0.987368	1.14547
1398	PC(48:4) & PS(52:3)	0.0221475	.logisticgdm01a34	+ve	notadj	0.925578	0.0416572	-1.72	0.086	0.847428	1.01093	.logisticgdm01a34matbmimatagei.sex12i.PET12i.ethnicityi.paritycodei.intervention	a34	adj	0.92365	0.0433863	-1.69	0.091	0.842411	1.01272
1440	PC(38:1)_[M+OAC]1- & PS(42:0)_[M-H]1-	0.0224628	.logisticgdm01a35	+ve	notadj	1.1483	0.0556218	2.85	0.004	1.0443	1.26266	.logisticgdm01a35matbmimatagei.sex12i.PET12i.ethnicityi.paritycodei.intervention	a35	adj	1.16961	0.0607376	3.02	0.003	1.05642	1.29492
1482	PC-O(38:6)_[M+OAC]1- & PS-P_42:1)_[M-H]1-	0.0232549	.logisticgdm01a36	+ve	notadj	1.12237	0.0626127	2.07	0.039	1.00612	1.25205	.logisticgdm01a36matbmimatagei.sex12i.PET12i.ethnicityi.paritycodei.intervention	a36	adj	1.11168	0.0655053	1.8	0.072	0.990432	1.24778
1524	TG(64:16)+Acetate & PI(50:2)	0.0247452	.logisticgdm01a37	+ve	notadj	0.94491	0.0264475	-2.02	0.043	0.89447	0.998195	.logisticgdm01a37matbmimatagei.sex12i.PET12i.ethnicityi.paritycodei.intervention	a37	adj	0.95383	0.0263526	-1.71	0.087	0.903553	1.0069
1566	PC-O(32:0)_[M+OAC]1-	0.0253314	.logisticgdm01a38	+ve	notadj	0.837099	0.0673876	-2.21	0.027	0.714915	0.980166	.logisticgdm01a38matbmimatagei.sex12i.PET12i.ethnicityi.paritycodei.intervention	a38	adj	0.865107	0.0721876	-1.74	0.082	0.734586	1.01882
1608	PC(46:2)_[M+OAC]1- & PS(50:1)	0.0265627	.logisticgdm01a39	+ve	notadj	0.890648	0.0555058	-1.86	0.063	0.78824	1.00636	.logisticgdm01a39matbmimatagei.sex12i.PET12i.ethnicityi.paritycodei.intervention	a39	adj	0.896719	0.0573054	-1.71	0.088	0.791152	1.01637
1650	PC(35:5)_[M+OAC]1- / PS(39:4)_[M-H]1-	0.0272794	.logisticgdm01a40	+ve	notadj	1.09221	0.0432504	2.23	0.026	1.01064	1.18035	.logisticgdm01a40matbmimatagei.sex12i.PET12i.ethnicityi.paritycodei.intervention	a40	adj	1.06474	0.0446127	1.5	0.134	0.980792	1.15587
1692	PC-O(34:2)_[M+OAC]1- & PS-O(38:1)_[M-H]1-	0.0298149	.logisticgdm01a41	+ve	notadj	0.882342	0.0626122	-1.76	0.078	0.767776	1.014	.logisticgdm01a41matbmimatagei.sex12i.PET12i.ethnicityi.paritycodei.intervention	a41	adj	0.889689	0.0662298	-1.57	0.116	0.768906	1.02944
1734	TG(65:10)+Cl-37 & TG(64:14)+Acetate & PI(50:0) & TG_oxid(64:10)+Cl-35	0.0325757	.logisticgdm01a42	+ve	notadj	0.892273	0.0608968	-1.67	0.095	0.780556	1.01998	.logisticgdm01a42matbmimatagei.sex12i.PET12i.ethnicityi.paritycodei.intervention	a42	adj	0.906715	0.0641256	-1.38	0.166	0.789353	1.04153
1776	PC(33:1)_[M+OAC]1- / PS(37:0)_[M-H]1-	0.032667	.logisticgdm01a43	+ve	notadj	0.852928	0.0783098	-1.73	0.083	0.712461	1.02109	.logisticgdm01a43matbmimatagei.sex12i.PET12i.ethnicityi.paritycodei.intervention	a43	adj	0.886228	0.0831303	-1.29	0.198	0.737396	1.0651
1818	PG-O(41:0)_[M-H]1-	0.0335124	.logisticgdm01a44	+ve	notadj	1.09062	0.0500529	1.89	0.059	0.9968	1.19327	.logisticgdm01a44matbmimatagei.sex12i.PET12i.ethnicityi.paritycodei.intervention	a44	adj	1.09611	0.0523101	1.92	0.055	0.99823	1.20358
1860	PI(52:2) & TG_oxid(66:12)+Cl-35	0.0345376	.logisticgdm01a45	+ve	notadj	0.895466	0.0407093	-2.43	0.015	0.819129	0.978917	.logisticgdm01a45matbmimatagei.sex12i.PET12i.ethnicityi.paritycodei.intervention	a45	adj	0.906014	0.0417437	-2.14	0.032	0.827784	0.991638
1902	PI(35:1)	0.0354171	.logisticgdm01a46	+ve	notadj	0.936337	0.0343178	-1.79	0.073	0.871435	1.00607	.logisticgdm01a46matbmimatagei.sex12i.PET12i.ethnicityi.paritycodei.intervention	a46	adj	0.937832	0.0355338	-1.69	0.09	0.87071	1.01013
1944	PC-O(36:3)_[M+OAC]1- & PS-O(40:2)_[M-H]1-	0.0364489	.logisticgdm01a47	+ve	notadj	0.907469	0.0499316	-1.76	0.078	0.814697	1.0108	.logisticgdm01a47matbmimatagei.sex12i.PET12i.ethnicityi.paritycodei.intervention	a47	adj	0.907013	0.0523281	-1.69	0.091	0.810038	1.0156
1986	PE(40:4)_[M-H]1-	0.0364783	.logisticgdm01a48	+ve	notadj	1.07919	0.0400788	2.05	0.04	1.00342	1.16067	.logisticgdm01a48matbmimatagei.sex12i.PET12i.ethnicityi.paritycodei.intervention	a48	adj	1.08247	0.0396822	2.16	0.031	1.00743	1.16311
2028	LPE(16:0)_[M-H]1-	0.0396311	.logisticgdm01a49	+ve	notadj	0.88112	0.0496904	-2.24	0.025	0.788918	0.984098	.logisticgdm01a49matbmimatagei.sex12i.PET12i.ethnicityi.paritycodei.intervention	a49	adj	0.890793	0.0511694	-2.01	0.044	0.795942	0.996947
2070	TG_oxid(49:5)+Cl-37 & TG_oxid(48:9)+Acetate	0.0445737	.logisticgdm01a50	+ve	notadj	1.04836	0.0266121	1.86	0.063	0.997476	1.10184	.logisticgdm01a50matbmimatagei.sex12i.PET12i.ethnicityi.paritycodei.intervention	a50	adj	1.03489	0.0238646	1.49	0.137	0.989158	1.08274
2112	TG_oxid(61:7)+Cl-37 & TG_oxid(60:11)+Acetate	0.0469926	.logisticgdm01a51	+ve	notadj	0.968423	0.0215662	-1.44	0.15	0.927064	1.01163	.logisticgdm01a51matbmimatagei.sex12i.PET12i.ethnicityi.paritycodei.intervention	a51	adj	0.97251	0.0202393	-1.34	0.18	0.93364	1.013
2154	PC(39:1)_[M+Cl]1-	0.0476625	.logisticgdm01a52	+ve	notadj	1.04239	0.0218221	1.98	0.047	1.00048	1.08605	.logisticgdm01a52matbmimatagei.sex12i.PET12i.ethnicityi.paritycodei.intervention	a52	adj	1.04283	0.0224015	1.95	0.051	0.999833	1.08767
2196	PC(32:1)_[M+OAC]1- & PS(36:0)	0.0515279	.logisticgdm01a53	+ve	notadj	1.16322	0.0828742	2.12	0.034	1.01162	1.33754	.logisticgdm01a53matbmimatagei.sex12i.PET12i.ethnicityi.paritycodei.intervention	a53	adj	1.18044	0.0874723	2.24	0.025	1.02087	1.36496
2238	PC-O(16:0)_[M+OAC]1- & PIP(48:2)	0.0563641	.logisticgdm01a54	+ve	notadj	0.866384	0.0651318	-1.91	0.056	0.747687	1.00392	.logisticgdm01a54matbmimatagei.sex12i.PET12i.ethnicityi.paritycodei.intervention	a54	adj	0.8836	0.0678838	-1.61	0.107	0.760083	1.02719
2280	PI(36:2)	0.0564619	.logisticgdm01a55	+ve	notadj	0.859141	0.069471	-1.88	0.06	0.733222	1.00669	.logisticgdm01a55matbmimatagei.sex12i.PET12i.ethnicityi.paritycodei.intervention	a55	adj	0.839125	0.0706592	-2.08	0.037	0.71146	0.989698
2322	PC(38:7)_[M+OAC]1- & PS(42:6)_[M-H]1-	0.0575827	.logisticgdm01a56	+ve	notadj	0.848055	0.0712215	-1.96	0.05	0.719346	0.999792	.logisticgdm01a56matbmimatagei.sex12i.PET12i.ethnicityi.paritycodei.intervention	a56	adj	0.832262	0.0724405	-2.11	0.035	0.701732	0.987073
2364	PC-P_40:6)_[M+OAC]1-	0.0578551	.logisticgdm01a57	+ve	notadj	1.07222	0.0410232	1.82	0.068	0.994758	1.15572	.logisticgdm01a57matbmimatagei.sex12i.PET12i.ethnicityi.paritycodei.intervention	a57	adj	1.07714	0.0428654	1.87	0.062	0.996321	1.16452
2406	PC(35:2)_[M+OAC]1- / PS(39:1)_[M-H]1-	0.0592973	.logisticgdm01a58	+ve	notadj	0.847899	0.0823554	-1.7	0.089	0.700919	1.0257	.logisticgdm01a58matbmimatagei.sex12i.PET12i.ethnicityi.paritycodei.intervention	a58	adj	0.830487	0.0842336	-1.83	0.067	0.680767	1.01313
2448	LPE(20:2)_[M-H]1-	0.060554	.logisticgdm01a59	+ve	notadj	0.909726	0.0449116	-1.92	0.055	0.825826	1.00215	.logisticgdm01a59matbmimatagei.sex12i.PET12i.ethnicityi.paritycodei.intervention	a59	adj	0.899485	0.0456461	-2.09	0.037	0.814325	0.99355
2490	Cer(41:1)_[M-H]1-	0.0626366	.logisticgdm01a60	+ve	notadj	1.08614	0.042037	2.13	0.033	1.0068	1.17174	.logisticgdm01a60matbmimatagei.sex12i.PET12i.ethnicityi.paritycodei.intervention	a60	adj	1.08443	0.043559	2.02	0.044	1.00233	1.17325
2532	SM(38:2)_[M+OAC]1- & TG_oxid(45:1)+Cl-37 & TG_oxid(44:5)+Acetate	0.0628498	.logisticgdm01a61	+ve	notadj	0.822492	0.0807365	-1.99	0.047	0.678542	0.996979	.logisticgdm01a61matbmimatagei.sex12i.PET12i.ethnicityi.paritycodei.intervention	a61	adj	0.801768	0.0805523	-2.2	0.028	0.658461	0.976265
2574	PE(37:2)_[M-H]1-	0.0651062	.logisticgdm01a62	+ve	notadj	1.06407	0.0524852	1.26	0.208	0.96602	1.17208	.logisticgdm01a62matbmimatagei.sex12i.PET12i.ethnicityi.paritycodei.intervention	a62	adj	1.06002	0.054918	1.13	0.261	0.957666	1.17331
2616	SM(35:1)_[M+OAC]1- & TG_oxid(42:0)+Cl-37	0.0654616	.logisticgdm01a63	+ve	notadj	0.833098	0.0817529	-1.86	0.063	0.687332	1.00978	.logisticgdm01a63matbmimatagei.sex12i.PET12i.ethnicityi.paritycodei.intervention	a63	adj	0.817291	0.0824626	-2	0.046	0.670645	0.996003
2658	PC(32:2)_[M+OAC]1- & PS(36:1)	0.0657109	.logisticgdm01a64	+ve	notadj	1.1344	0.0770475	1.86	0.063	0.993006	1.29592	.logisticgdm01a64matbmimatagei.sex12i.PET12i.ethnicityi.paritycodei.intervention	a64	adj	1.14868	0.0801219	1.99	0.047	1.0019	1.31696
2700	PA(51:8) & TG_oxid(52:8)+Cl-35	0.0682193	.logisticgdm01a65	+ve	notadj	1.08384	0.0473556	1.84	0.065	0.994893	1.18075	.logisticgdm01a65matbmimatagei.sex12i.PET12i.ethnicityi.paritycodei.intervention	a65	adj	1.07275	0.047715	1.58	0.114	0.983188	1.17046
2742	PS(43:6)	0.0689106	.logisticgdm01a66	+ve	notadj	1.04124	0.0225523	1.87	0.062	0.997965	1.08639	.logisticgdm01a66matbmimatagei.sex12i.PET12i.ethnicityi.paritycodei.intervention	a66	adj	1.04429	0.0234335	1.93	0.053	0.999352	1.09124
2784	PC(36:7)_[M+OAC]1- & PS(40:6)_[M-H]1-	0.0696171	.logisticgdm01a67	+ve	notadj	0.861509	0.0711195	-1.81	0.071	0.73281	1.01281	.logisticgdm01a67matbmimatagei.sex12i.PET12i.ethnicityi.paritycodei.intervention	a67	adj	0.852766	0.0736304	-1.84	0.065	0.720003	1.01001
2826	PC(46:4) & PS(50:3)	0.070098	.logisticgdm01a68	+ve	notadj	0.922672	0.0446521	-1.66	0.096	0.839178	1.01447	.logisticgdm01a68matbmimatagei.sex12i.PET12i.ethnicityi.paritycodei.intervention	a68	adj	0.925876	0.0470815	-1.51	0.13	0.838047	1.02291
2868	PC(48:1) & PS(52:0)	0.0701039	.logisticgdm01a69	+ve	notadj	0.909503	0.0635466	-1.36	0.175	0.793106	1.04298	.logisticgdm01a69matbmimatagei.sex12i.PET12i.ethnicityi.paritycodei.intervention	a69	adj	0.931119	0.068285	-0.97	0.33	0.806457	1.07505
2910	PC(35:3)_[M+OAC]1- / PS(39:2)_[M-H]1-	0.0704087	.logisticgdm01a70	+ve	notadj	0.874825	0.0768577	-1.52	0.128	0.736443	1.03921	.logisticgdm01a70matbmimatagei.sex12i.PET12i.ethnicityi.paritycodei.intervention	a70	adj	0.888179	0.0818183	-1.29	0.198	0.741461	1.06393
2952	SM(42:0)_[M+OAC]1- & TG_oxid(48:3)+Acetate	0.0802751	.logisticgdm01a71	+ve	notadj	1.0637	0.0351604	1.87	0.062	0.996971	1.13489	.logisticgdm01a71matbmimatagei.sex12i.PET12i.ethnicityi.paritycodei.intervention	a71	adj	1.07004	0.0342183	2.12	0.034	1.00503	1.13925
2994	TG_oxid(55:1)+Cl-37 & TG_oxid(54:5)+Acetate	0.0831971	.logisticgdm01a72	+ve	notadj	0.932834	0.0618604	-1.05	0.294	0.819138	1.06231	.logisticgdm01a72matbmimatagei.sex12i.PET12i.ethnicityi.paritycodei.intervention	a72	adj	0.927765	0.0638295	-1.09	0.276	0.81073	1.0617
3036	SM(41:1)_[M+OAC]1- & TG_oxid(48:1)+Cl-37 & TG_oxid(47:5)+Acetate	0.0835683	.logisticgdm01a73	+ve	notadj	0.848848	0.0857608	-1.62	0.105	0.696356	1.03473	.logisticgdm01a73matbmimatagei.sex12i.PET12i.ethnicityi.paritycodei.intervention	a73	adj	0.834546	0.0868777	-1.74	0.082	0.680516	1.02344
3078	PE(35:1)_[M-H]1-	0.0842175	.logisticgdm01a74	+ve	notadj	1.04458	0.0365073	1.25	0.212	0.97542	1.11864	.logisticgdm01a74matbmimatagei.sex12i.PET12i.ethnicityi.paritycodei.intervention	a74	adj	1.06547	0.0389025	1.74	0.082	0.991887	1.14451
3120	PC(36:7) & PS(40:6)	0.0866983	.logisticgdm01a75	+ve	notadj	0.86879	0.0715792	-1.71	0.088	0.739239	1.02104	.logisticgdm01a75matbmimatagei.sex12i.PET12i.ethnicityi.paritycodei.intervention	a75	adj	0.857324	0.0739092	-1.79	0.074	0.724042	1.01514
3162	TG(61:6)+Cl-37 & TG(60:10)+Acetate	0.0903628	.logisticgdm01a76	+ve	notadj	0.911988	0.0713551	-1.18	0.239	0.78233	1.06313	.logisticgdm01a76matbmimatagei.sex12i.PET12i.ethnicityi.paritycodei.intervention	a76	adj	0.893053	0.0733024	-1.38	0.168	0.760344	1.04893
3204	PC(33:2)_[M+OAC]1- / PS(37:1)_[M-H]1-	0.0910383	.logisticgdm01a77	+ve	notadj	0.877935	0.079672	-1.43	0.151	0.73488	1.04884	.logisticgdm01a77matbmimatagei.sex12i.PET12i.ethnicityi.paritycodei.intervention	a77	adj	0.856672	0.0814856	-1.63	0.104	0.710967	1.03224
3246	PC(38:3)_[M+OAC]1- & PS(42:2)_[M-H]1-	0.0923331	.logisticgdm01a78	+ve	notadj	1.14868	0.0846805	1.88	0.06	0.994142	1.32724	.logisticgdm01a78matbmimatagei.sex12i.PET12i.ethnicityi.paritycodei.intervention	a78	adj	1.18595	0.0939927	2.15	0.031	1.01532	1.38525
3288	TG(48:4)+Cl-37	0.0968325	.logisticgdm01a79	+ve	notadj	1.05712	0.0379058	1.55	0.121	0.985376	1.13409	.logisticgdm01a79matbmimatagei.sex12i.PET12i.ethnicityi.paritycodei.intervention	a79	adj	1.06263	0.0391723	1.65	0.099	0.988564	1.14225
3330	PC-P_28:0)_[M+OAC]1- / PS-O(32:0)_[M-H]1-	0.0972122	.logisticgdm01a80	+ve	notadj	0.932307	0.0318626	-2.05	0.04	0.871903	0.996896	.logisticgdm01a80matbmimatagei.sex12i.PET12i.ethnicityi.paritycodei.intervention	a80	adj	0.952573	0.0328303	-1.41	0.159	0.890352	1.01914
3372	PG(48:10)	0.0975222	.logisticgdm01a81	+ve	notadj	1.14061	0.0776776	1.93	0.053	0.998093	1.30349	.logisticgdm01a81matbmimatagei.sex12i.PET12i.ethnicityi.paritycodei.intervention	a81	adj	1.18086	0.0857173	2.29	0.022	1.02426	1.3614
3414	PC(40:1)_[M+OAC]1- & PS(44:0)_[M-H]1-	0.0977459	.logisticgdm01a82	+ve	notadj	0.941681	0.0443827	-1.27	0.202	0.85859	1.03281	.logisticgdm01a82matbmimatagei.sex12i.PET12i.ethnicityi.paritycodei.intervention	a82	adj	0.951141	0.0457204	-1.04	0.297	0.865622	1.04511
3456	SM(44:1)_[M+OAC]1- & TG_oxid(51:0)+Cl-37 & TG_oxid(50:4)+Acetate	0.0981274	.logisticgdm01a83	+ve	notadj	0.923355	0.051133	-1.44	0.15	0.828383	1.02921	.logisticgdm01a83matbmimatagei.sex12i.PET12i.ethnicityi.paritycodei.intervention	a83	adj	0.929654	0.052983	-1.28	0.201	0.831399	1.03952
3498	PT(18:0/18:1(9Z)	0.0986531	.logisticgdm01a84	+ve	notadj	0.874695	0.0812492	-1.44	0.15	0.729104	1.04936	.logisticgdm01a84matbmimatagei.sex12i.PET12i.ethnicityi.paritycodei.intervention	a84	adj	0.856743	0.0833207	-1.59	0.112	0.708058	1.03665
3540	PA(49:7) & TG_oxid(50:7)+Cl-35	0.100769	.logisticgdm01a85	+ve	notadj	1.15164	0.088047	1.85	0.065	0.991381	1.33781	.logisticgdm01a85matbmimatagei.sex12i.PET12i.ethnicityi.paritycodei.intervention	a85	adj	1.18507	0.0966942	2.08	0.037	1.00993	1.39058
3582	PI(32:0) & PA(45:10)	0.104371	.logisticgdm01a86	+ve	notadj	0.925167	0.0442135	-1.63	0.104	0.842445	1.01601	.logisticgdm01a86matbmimatagei.sex12i.PET12i.ethnicityi.paritycodei.intervention	a86	adj	0.930614	0.0458003	-1.46	0.144	0.84504	1.02485
3624	TG(61:5)+Cl-37 & TG(60:9)+Acetate	0.105894	.logisticgdm01a87	+ve	notadj	0.921333	0.0625021	-1.21	0.227	0.806625	1.05235	.logisticgdm01a87matbmimatagei.sex12i.PET12i.ethnicityi.paritycodei.intervention	a87	adj	0.946636	0.0670841	-0.77	0.439	0.823877	1.08769
3666	PC-O(34:1)_[M+OAC]1- & PS-O(38:0)_[M-H]1-	0.11301	.logisticgdm01a88	+ve	notadj	0.875569	0.0797542	-1.46	0.145	0.732412	1.04671	.logisticgdm01a88matbmimatagei.sex12i.PET12i.ethnicityi.paritycodei.intervention	a88	adj	0.927168	0.0874859	-0.8	0.423	0.77062	1.11552
3708	PC-O(34:0)_[M+OAC]1-	0.115335	.logisticgdm01a89	+ve	notadj	0.958737	0.0298309	-1.35	0.176	0.902016	1.01902	.logisticgdm01a89matbmimatagei.sex12i.PET12i.ethnicityi.paritycodei.intervention	a89	adj	0.964862	0.0295245	-1.17	0.242	0.908696	1.0245
3750	TG_oxid(50:7)+Cl-37	0.117584	.logisticgdm01a90	+ve	notadj	0.941371	0.0436147	-1.3	0.192	0.859654	1.03086	.logisticgdm01a90matbmimatagei.sex12i.PET12i.ethnicityi.paritycodei.intervention	a90	adj	0.943344	0.0462802	-1.19	0.235	0.856861	1.03856
3792	PC(42:11)_[M+OAC]1- & PS(46:10)	0.122813	.logisticgdm01a91	+ve	notadj	0.901398	0.0520707	-1.8	0.072	0.804906	1.00946	.logisticgdm01a91matbmimatagei.sex12i.PET12i.ethnicityi.paritycodei.intervention	a91	adj	0.900373	0.0538861	-1.75	0.08	0.800717	1.01243
3834	LPE(20:1)_[M-H]1-	0.1229	.logisticgdm01a92	+ve	notadj	0.910664	0.0470984	-1.81	0.07	0.822878	1.00782	.logisticgdm01a92matbmimatagei.sex12i.PET12i.ethnicityi.paritycodei.intervention	a92	adj	0.931959	0.0455071	-1.44	0.149	0.846902	1.02556
3876	PI(38:4)	0.12395	.logisticgdm01a93	+ve	notadj	0.894898	0.0713322	-1.39	0.164	0.765463	1.04622	.logisticgdm01a93matbmimatagei.sex12i.PET12i.ethnicityi.paritycodei.intervention	a93	adj	0.894655	0.0744448	-1.34	0.181	0.760023	1.05314
3918	PC(44:4)_[M+OAC]1- & PS(48:3)	0.124327	.logisticgdm01a94	+ve	notadj	1.10068	0.0701832	1.5	0.132	0.971372	1.2472	.logisticgdm01a94matbmimatagei.sex12i.PET12i.ethnicityi.paritycodei.intervention	a94	adj	1.08947	0.0729513	1.28	0.201	0.955473	1.24226
3960	PE(38:4)_[M-H]1-	0.128854	.logisticgdm01a95	+ve	notadj	1.18375	0.116644	1.71	0.087	0.975849	1.43593	.logisticgdm01a95matbmimatagei.sex12i.PET12i.ethnicityi.paritycodei.intervention	a95	adj	1.11283	0.113617	1.05	0.295	0.911013	1.35936
4002	TG_oxid(53:0)+Cl-37 & TG_oxid(52:4)+Acetate	0.137527	.logisticgdm01a96	+ve	notadj	0.944935	0.0525125	-1.02	0.308	0.847419	1.05367	.logisticgdm01a96matbmimatagei.sex12i.PET12i.ethnicityi.paritycodei.intervention	a96	adj	0.939598	0.0542392	-1.08	0.28	0.839085	1.05215
4044	PC-O(38:5)_[M+OAC]1- & PS-O(42:4)_[M-H]1-	0.14011	.logisticgdm01a97	+ve	notadj	0.871137	0.0832219	-1.44	0.149	0.722386	1.05052	.logisticgdm01a97matbmimatagei.sex12i.PET12i.ethnicityi.paritycodei.intervention	a97	adj	0.873465	0.086513	-1.37	0.172	0.719345	1.0606
4086	SM(32:1)_[M+OAC]1- & TG_oxid(39:0)+Cl-37 & TG_oxid(38:4)+Acetate	0.14496	.logisticgdm01a98	+ve	notadj	0.87241	0.0808164	-1.47	0.141	0.72756	1.0461	.logisticgdm01a98matbmimatagei.sex12i.PET12i.ethnicityi.paritycodei.intervention	a98	adj	0.837558	0.0811152	-1.83	0.067	0.692753	1.01263
4128	TG_oxid(61:1)+Cl-37 & TG_oxid(60:5)+Acetate	0.145827	.logisticgdm01a99	+ve	notadj	0.963331	0.0382005	-0.94	0.346	0.891295	1.04119	.logisticgdm01a99matbmimatagei.sex12i.PET12i.ethnicityi.paritycodei.intervention	a99	adj	0.952082	0.0398316	-1.17	0.241	0.877128	1.03344
4170	TG(63:8)+Cl-37 & TG(62:12)+Acetate	0.147444	.logisticgdm01a100	+ve	notadj	0.942059	0.0681986	-0.82	0.41	0.817442	1.08567	.logisticgdm01a100matbmimatagei.sex12i.PET12i.ethnicityi.paritycodei.intervention	a100	adj	0.915084	0.0690328	-1.18	0.239	0.789309	1.0609
4212	PA(46:9)	0.15107	.logisticgdm01a101	+ve	notadj	1.03348	0.0281653	1.21	0.227	0.979726	1.09018	.logisticgdm01a101matbmimatagei.sex12i.PET12i.ethnicityi.paritycodei.intervention	a101	adj	1.0087	0.0290235	0.3	0.763	0.953391	1.06722
4254	PC(33:2)_[M+Cl]1- & PG(P-16:0/22:6)	0.151528	.logisticgdm01a102	+ve	notadj	1.03355	0.0381522	0.89	0.371	0.961418	1.1111	.logisticgdm01a102matbmimatagei.sex12i.PET12i.ethnicityi.paritycodei.intervention	a102	adj	1.04055	0.0413138	1	0.317	0.962649	1.12476
4296	PC(48:1)_[M+OAC]1- & PS(52:1)	0.153064	.logisticgdm01a103	+ve	notadj	0.935825	0.0717828	-0.86	0.387	0.805198	1.08764	.logisticgdm01a103matbmimatagei.sex12i.PET12i.ethnicityi.paritycodei.intervention	a103	adj	0.912904	0.0736156	-1.13	0.258	0.779444	1.06922
4338	PC-P_42:4)_[M+OAC]1-	0.153673	.logisticgdm01a104	+ve	notadj	0.918048	0.046544	-1.69	0.092	0.831209	1.01396	.logisticgdm01a104matbmimatagei.sex12i.PET12i.ethnicityi.paritycodei.intervention	a104	adj	0.936397	0.0485236	-1.27	0.205	0.845963	1.0365
4380	PE-O(38:5)_[M-H]1-	0.154438	.logisticgdm01a105	+ve	notadj	1.0941	0.0616706	1.6	0.111	0.979662	1.2219	.logisticgdm01a105matbmimatagei.sex12i.PET12i.ethnicityi.paritycodei.intervention	a105	adj	1.05189	0.0659498	0.81	0.42	0.930254	1.18942
4422	PE-O(38:4)_[M-H]1-	0.154636	.logisticgdm01a106	+ve	notadj	1.09187	0.0630179	1.52	0.128	0.975083	1.22264	.logisticgdm01a106matbmimatagei.sex12i.PET12i.ethnicityi.paritycodei.intervention	a106	adj	1.06398	0.0645482	1.02	0.307	0.944703	1.19832
4464	PG(O-20:0/22:0)	0.157897	.logisticgdm01a107	+ve	notadj	1.02296	0.0154907	1.5	0.134	0.993045	1.05378	.logisticgdm01a107matbmimatagei.sex12i.PET12i.ethnicityi.paritycodei.intervention	a107	adj	1.02771	0.0154767	1.82	0.069	0.997824	1.0585
4506	PI(52:3)	0.159469	.logisticgdm01a108	+ve	notadj	0.961559	0.0299619	-1.26	0.208	0.904592	1.02211	.logisticgdm01a108matbmimatagei.sex12i.PET12i.ethnicityi.paritycodei.intervention	a108	adj	0.962834	0.0296692	-1.23	0.219	0.906405	1.02278
4548	LPE(22:6)_[M-H]1-	0.161573	.logisticgdm01a109	+ve	notadj	0.932836	0.0444526	-1.46	0.145	0.849656	1.02416	.logisticgdm01a109matbmimatagei.sex12i.PET12i.ethnicityi.paritycodei.intervention	a109	adj	0.924384	0.0471304	-1.54	0.123	0.836476	1.02153
4590	LPE(20:4)_[M-H]1-	0.164685	.logisticgdm01a110	+ve	notadj	0.919873	0.0453863	-1.69	0.091	0.835083	1.01327	.logisticgdm01a110matbmimatagei.sex12i.PET12i.ethnicityi.paritycodei.intervention	a110	adj	0.902752	0.0464589	-1.99	0.047	0.816136	0.99856
4632	PC(32:3)_[M+OAC]1- & PS(36:2)	0.165459	.logisticgdm01a111	+ve	notadj	1.01868	0.0122027	1.54	0.122	0.995041	1.04288	.logisticgdm01a111matbmimatagei.sex12i.PET12i.ethnicityi.paritycodei.intervention	a111	adj	1.0286	0.0137064	2.12	0.034	1.00209	1.05582
4674	PA(49:8) & TG_oxid(50:8)+Cl-35	0.171059	.logisticgdm01a112	+ve	notadj	1.14702	0.102219	1.54	0.124	0.9632	1.36593	.logisticgdm01a112matbmimatagei.sex12i.PET12i.ethnicityi.paritycodei.intervention	a112	adj	1.10025	0.101206	1.04	0.299	0.918747	1.31762
4716	TG(62:12)+Cl-35	0.172618	.logisticgdm01a113	+ve	notadj	0.970556	0.0213478	-1.36	0.174	0.929604	1.01331	.logisticgdm01a113matbmimatagei.sex12i.PET12i.ethnicityi.paritycodei.intervention	a113	adj	0.970483	0.0219163	-1.33	0.185	0.928465	1.0144
4758	TG_oxid(63:1)+Cl-37 & TG_oxid(62:5)+Acetate	0.177349	.logisticgdm01a114	+ve	notadj	0.944859	0.0508821	-1.05	0.292	0.850215	1.05004	.logisticgdm01a114matbmimatagei.sex12i.PET12i.ethnicityi.paritycodei.intervention	a114	adj	0.930604	0.0516713	-1.3	0.195	0.834646	1.03759
4800	PE-O(36:4)_[M-H]1-	0.177999	.logisticgdm01a115	+ve	notadj	1.04874	0.0439155	1.14	0.256	0.9661	1.13844	.logisticgdm01a115matbmimatagei.sex12i.PET12i.ethnicityi.paritycodei.intervention	a115	adj	1.01998	0.045429	0.44	0.657	0.93472	1.11302
4842	LPS(20:0)_[M-H]1- & LPC(16:1)_[M+OAC]1-	0.185066	.logisticgdm01a116	+ve	notadj	0.954096	0.026215	-1.71	0.087	0.904074	1.00689	.logisticgdm01a116matbmimatagei.sex12i.PET12i.ethnicityi.paritycodei.intervention	a116	adj	0.961586	0.0270243	-1.39	0.163	0.910052	1.01604
4884	TG_oxid(55:7)+Cl-35	0.188046	.logisticgdm01a117	+ve	notadj	1.03426	0.0395375	0.88	0.378	0.959603	1.11473	.logisticgdm01a117matbmimatagei.sex12i.PET12i.ethnicityi.paritycodei.intervention	a117	adj	1.04688	0.0420263	1.14	0.254	0.967662	1.13257
4926	PG-O(40:0)_[M-H]1-	0.188096	.logisticgdm01a118	+ve	notadj	1.1106	0.0834926	1.4	0.163	0.95844	1.28691	.logisticgdm01a118matbmimatagei.sex12i.PET12i.ethnicityi.paritycodei.intervention	a118	adj	1.11239	0.0859531	1.38	0.168	0.956063	1.29428
4968	PIP(48:4) & LPS(20:0)	0.188352	.logisticgdm01a119	+ve	notadj	0.954492	0.0261533	-1.7	0.089	0.904584	1.00715	.logisticgdm01a119matbmimatagei.sex12i.PET12i.ethnicityi.paritycodei.intervention	a119	adj	0.961916	0.0269587	-1.39	0.166	0.910503	1.01623
5010	TG_oxid(42:2)+Cl-37	0.19312	.logisticgdm01a120	+ve	notadj	0.890028	0.0864099	-1.2	0.23	0.735806	1.07657	.logisticgdm01a120matbmimatagei.sex12i.PET12i.ethnicityi.paritycodei.intervention	a120	adj	0.882791	0.0892753	-1.23	0.218	0.724064	1.07631
5052	PC(44:2)_[M+OAC]1- & PS(48:1)	0.204098	.logisticgdm01a121	+ve	notadj	0.930471	0.0542486	-1.24	0.216	0.829996	1.04311	.logisticgdm01a121matbmimatagei.sex12i.PET12i.ethnicityi.paritycodei.intervention	a121	adj	0.937371	0.0564771	-1.07	0.283	0.832964	1.05486
5094	PC(44:1)_[M+OAC]1- & PS(48:0)	0.211517	.logisticgdm01a122	+ve	notadj	0.952151	0.0419775	-1.11	0.266	0.873331	1.03808	.logisticgdm01a122matbmimatagei.sex12i.PET12i.ethnicityi.paritycodei.intervention	a122	adj	0.972843	0.0432358	-0.62	0.536	0.891688	1.06138
5136	CL(74:5)_[M]2-	0.211822	.logisticgdm01a123	+ve	notadj	0.918953	0.0740269	-1.05	0.294	0.784737	1.07612	.logisticgdm01a123matbmimatagei.sex12i.PET12i.ethnicityi.paritycodei.intervention	a123	adj	0.909808	0.0760826	-1.13	0.258	0.772268	1.07184
5178	CL(78:1)_[M]2- & TG_oxid(42:1)+Cl-37	0.212689	.logisticgdm01a124	+ve	notadj	0.923489	0.0668824	-1.1	0.272	0.801281	1.06434	.logisticgdm01a124matbmimatagei.sex12i.PET12i.ethnicityi.paritycodei.intervention	a124	adj	0.888964	0.0689469	-1.52	0.129	0.7636	1.03491
5220	PA(22:6(4Z,7Z,10Z,13Z,16Z,19Z)/22:4(7Z,10Z,13Z,16Z)	0.214818	.logisticgdm01a125	+ve	notadj	1.01421	0.0360463	0.4	0.691	0.945962	1.08737	.logisticgdm01a125matbmimatagei.sex12i.PET12i.ethnicityi.paritycodei.intervention	a125	adj	1.0275	0.0385903	0.72	0.47	0.954585	1.10599
5262	PI-O(38:1)_[M-H]1-	0.215236	.logisticgdm01a126	+ve	notadj	1.03968	0.0405813	1	0.319	0.96311	1.12234	.logisticgdm01a126matbmimatagei.sex12i.PET12i.ethnicityi.paritycodei.intervention	a126	adj	1.03538	0.0435782	0.83	0.409	0.953401	1.12442
5304	LPE(18:0)_[M-H]1-	0.224493	.logisticgdm01a127	+ve	notadj	0.907976	0.0714644	-1.23	0.22	0.778177	1.05943	.logisticgdm01a127matbmimatagei.sex12i.PET12i.ethnicityi.paritycodei.intervention	a127	adj	0.922826	0.0743292	-1	0.319	0.788061	1.08064
5346	TG(63:6)+Cl-37	0.225012	.logisticgdm01a128	+ve	notadj	0.946316	0.0713493	-0.73	0.464	0.816315	1.09702	.logisticgdm01a128matbmimatagei.sex12i.PET12i.ethnicityi.paritycodei.intervention	a128	adj	0.929855	0.0734861	-0.92	0.357	0.796426	1.08564
5388	PA(49:9) & TG_oxid(50:9)+Cl-35	0.225104	.logisticgdm01a129	+ve	notadj	1.13662	0.117506	1.24	0.215	0.928151	1.39192	.logisticgdm01a129matbmimatagei.sex12i.PET12i.ethnicityi.paritycodei.intervention	a129	adj	1.08246	0.116287	0.74	0.461	0.87694	1.33615
5430	PG(O-20:0/16:0)	0.225604	.logisticgdm01a130	+ve	notadj	0.945133	0.0574397	-0.93	0.353	0.839	1.06469	.logisticgdm01a130matbmimatagei.sex12i.PET12i.ethnicityi.paritycodei.intervention	a130	adj	0.918971	0.0587232	-1.32	0.186	0.810791	1.04158
5472	TG_oxid(59:0)+Cl-37 & TG_oxid(58:4)+Acetate	0.226934	.logisticgdm01a131	+ve	notadj	0.964558	0.057381	-0.61	0.544	0.858402	1.08384	.logisticgdm01a131matbmimatagei.sex12i.PET12i.ethnicityi.paritycodei.intervention	a131	adj	0.954716	0.0583517	-0.76	0.448	0.846933	1.07621
5514	PC(32:1)_[M+OAC]1- & PS(36:0)_[M-H]1-	0.22708	.logisticgdm01a132	+ve	notadj	1.10294	0.0794607	1.36	0.174	0.957699	1.27022	.logisticgdm01a132matbmimatagei.sex12i.PET12i.ethnicityi.paritycodei.intervention	a132	adj	1.1332	0.0856789	1.65	0.098	0.97712	1.31421
5556	TG_oxid(53:8)+Cl-37	0.228774	.logisticgdm01a133	+ve	notadj	1.00935	0.0108512	0.87	0.387	0.988301	1.03084	.logisticgdm01a133matbmimatagei.sex12i.PET12i.ethnicityi.paritycodei.intervention	a133	adj	1.00838	0.0109978	0.77	0.444	0.987053	1.03017
5598	PC(24:3)_[M+OAC]1- & PS(28:2)	0.22931	.logisticgdm01a134	+ve	notadj	1.01859	0.0182042	1.03	0.303	0.983526	1.0549	.logisticgdm01a134matbmimatagei.sex12i.PET12i.ethnicityi.paritycodei.intervention	a134	adj	1.01954	0.0191948	1.03	0.304	0.982609	1.05787
5640	SM(39:1)_[M+OAC]1- & TG_oxid(46:0)+Cl-37 & TG_oxid(45:4)+Acetate	0.230044	.logisticgdm01a135	+ve	notadj	0.874585	0.0894325	-1.31	0.19	0.715749	1.06867	.logisticgdm01a135matbmimatagei.sex12i.PET12i.ethnicityi.paritycodei.intervention	a135	adj	0.862154	0.0910069	-1.41	0.16	0.701026	1.06032
5682	Cer(42:2)_[M+Cl]1-	0.230506	.logisticgdm01a136	+ve	notadj	1.03263	0.0311827	1.06	0.288	0.97329	1.0956	.logisticgdm01a136matbmimatagei.sex12i.PET12i.ethnicityi.paritycodei.intervention	a136	adj	1.04958	0.0326911	1.55	0.12	0.987425	1.11565
5724	PA(47:8) & TG_oxid(48:8)+Cl-35	0.238107	.logisticgdm01a137	+ve	notadj	1.13934	0.107874	1.38	0.168	0.946366	1.37166	.logisticgdm01a137matbmimatagei.sex12i.PET12i.ethnicityi.paritycodei.intervention	a137	adj	1.08564	0.106245	0.84	0.401	0.896156	1.31519
5766	CL(76:3)_[M]2- & TG_oxid(41:2)+Cl-37 & TG_oxid(40:6)+Ac	0.240307	.logisticgdm01a138	+ve	notadj	1.02565	0.0324581	0.8	0.424	0.963967	1.09128	.logisticgdm01a138matbmimatagei.sex12i.PET12i.ethnicityi.paritycodei.intervention	a138	adj	1.01863	0.033517	0.56	0.575	0.955009	1.08648
5808	PC(40:4)_[M+OAC]1- & PS(44:3)_[M-H]1-	0.244998	.logisticgdm01a139	+ve	notadj	1.13911	0.0775139	1.91	0.056	0.996877	1.30163	.logisticgdm01a139matbmimatagei.sex12i.PET12i.ethnicityi.paritycodei.intervention	a139	adj	1.13352	0.0798879	1.78	0.075	0.987273	1.30142
5850	PC(41:1)_[M+OAC]1- & PS(45:0)	0.250262	.logisticgdm01a140	+ve	notadj	0.944968	0.0385581	-1.39	0.165	0.872338	1.02364	.logisticgdm01a140matbmimatagei.sex12i.PET12i.ethnicityi.paritycodei.intervention	a140	adj	0.959234	0.033402	-1.2	0.232	0.895951	1.02699
5892	PC(52:4)_[M+OAC]1-	0.252703	.logisticgdm01a141	+ve	notadj	0.941723	0.0646622	-0.87	0.382	0.823145	1.07738	.logisticgdm01a141matbmimatagei.sex12i.PET12i.ethnicityi.paritycodei.intervention	a141	adj	0.916449	0.065491	-1.22	0.222	0.796673	1.05423
5934	PS-O(32:1)_[M-H]1-	0.254995	.logisticgdm01a142	+ve	notadj	0.946925	0.0302066	-1.71	0.087	0.889534	1.00802	.logisticgdm01a142matbmimatagei.sex12i.PET12i.ethnicityi.paritycodei.intervention	a142	adj	0.946297	0.031834	-1.64	0.101	0.885916	1.01079
5976	PI(34:2)	0.255767	.logisticgdm01a143	+ve	notadj	0.923967	0.0696266	-1.05	0.294	0.797101	1.07102	.logisticgdm01a143matbmimatagei.sex12i.PET12i.ethnicityi.paritycodei.intervention	a143	adj	0.903096	0.0711987	-1.29	0.196	0.773796	1.054
6018	PC(33:3)_[M+OAC]1- / PS(37:2)_[M-H]1-	0.260011	.logisticgdm01a144	+ve	notadj	0.953633	0.0620445	-0.73	0.466	0.839463	1.08333	.logisticgdm01a144matbmimatagei.sex12i.PET12i.ethnicityi.paritycodei.intervention	a144	adj	0.986491	0.0678926	-0.2	0.843	0.862008	1.12895
6060	PC(31:0)_[M+OAC]1-	0.260102	.logisticgdm01a145	+ve	notadj	1.15047	0.0980383	1.64	0.1	0.973512	1.3596	.logisticgdm01a145matbmimatagei.sex12i.PET12i.ethnicityi.paritycodei.intervention	a145	adj	1.13795	0.100461	1.46	0.143	0.957147	1.35292
6102	PC-O(17:0)_[M+OAC]1- & PIP(50:2)	0.260892	.logisticgdm01a146	+ve	notadj	0.941219	0.0365189	-1.56	0.118	0.872297	1.01559	.logisticgdm01a146matbmimatagei.sex12i.PET12i.ethnicityi.paritycodei.intervention	a146	adj	0.948302	0.0370787	-1.36	0.175	0.878344	1.02383
6144	PC-O(36:5)_[M+OAC]1- & PS-O(40:4)_[M-H]1-	0.26102	.logisticgdm01a147	+ve	notadj	1.05645	0.0642498	0.9	0.367	0.937737	1.19019	.logisticgdm01a147matbmimatagei.sex12i.PET12i.ethnicityi.paritycodei.intervention	a147	adj	1.02759	0.0664163	0.42	0.674	0.90532	1.16636
6186	PI(38:6)	0.263096	.logisticgdm01a148	+ve	notadj	0.95022	0.0386321	-1.26	0.209	0.877441	1.02904	.logisticgdm01a148matbmimatagei.sex12i.PET12i.ethnicityi.paritycodei.intervention	a148	adj	0.93854	0.0398194	-1.5	0.135	0.863653	1.01992
6228	PC(38:4)_[M+OAC]1- & PS(42:3)_[M-H]1-	0.264525	.logisticgdm01a149	+ve	notadj	1.11952	0.0979051	1.29	0.197	0.943173	1.32884	.logisticgdm01a149matbmimatagei.sex12i.PET12i.ethnicityi.paritycodei.intervention	a149	adj	1.07665	0.0971876	0.82	0.413	0.902066	1.28503
6270	PC(40:8)_[M+OAC]1- & PS(44:7)_[M-H]1-	0.264666	.logisticgdm01a150	+ve	notadj	0.934721	0.0614204	-1.03	0.304	0.821769	1.0632	.logisticgdm01a150matbmimatagei.sex12i.PET12i.ethnicityi.paritycodei.intervention	a150	adj	0.963556	0.0680397	-0.53	0.599	0.839017	1.10658
6312	SM(42:3)_[M+OAC]1- & TG_oxid(49:2)+Cl-37 & TG_oxid(48:6)+Acetate	0.264792	.logisticgdm01a151	+ve	notadj	0.903498	0.0865178	-1.06	0.289	0.748889	1.09003	.logisticgdm01a151matbmimatagei.sex12i.PET12i.ethnicityi.paritycodei.intervention	a151	adj	0.871175	0.0861803	-1.39	0.163	0.717631	1.05757
6354	PI(38:1)	0.272073	.logisticgdm01a152	+ve	notadj	0.950848	0.0442552	-1.08	0.279	0.867949	1.04167	.logisticgdm01a152matbmimatagei.sex12i.PET12i.ethnicityi.paritycodei.intervention	a152	adj	0.971016	0.0463773	-0.62	0.538	0.884243	1.0663
6396	PC(42:6) & PS(46:5)	0.272507	.logisticgdm01a153	+ve	notadj	0.960408	0.030747	-1.26	0.207	0.901997	1.0226	.logisticgdm01a153matbmimatagei.sex12i.PET12i.ethnicityi.paritycodei.intervention	a153	adj	0.989043	0.0315288	-0.35	0.73	0.929139	1.05281
6438	PC(37:4)_[M+OAC]1- / PS(41:3)_[M-H]1-	0.272792	.logisticgdm01a154	+ve	notadj	0.917573	0.0811721	-0.97	0.331	0.771508	1.09129	.logisticgdm01a154matbmimatagei.sex12i.PET12i.ethnicityi.paritycodei.intervention	a154	adj	0.880281	0.080731	-1.39	0.164	0.735457	1.05362
6480	TG_oxid(49:6)+Cl-37	0.275336	.logisticgdm01a155	+ve	notadj	1.03539	0.0293512	1.23	0.22	0.979433	1.09455	.logisticgdm01a155matbmimatagei.sex12i.PET12i.ethnicityi.paritycodei.intervention	a155	adj	1.0315	0.0299655	1.07	0.286	0.974406	1.09193
6522	TG(52:6)+Cl-35	0.281069	.logisticgdm01a156	+ve	notadj	0.988784	0.0198504	-0.56	0.574	0.950633	1.02847	.logisticgdm01a156matbmimatagei.sex12i.PET12i.ethnicityi.paritycodei.intervention	a156	adj	0.987693	0.0210612	-0.58	0.561	0.947265	1.02985
6564	PI(36:5)	0.284868	.logisticgdm01a157	+ve	notadj	1.01748	0.0132324	1.33	0.183	0.991869	1.04374	.logisticgdm01a157matbmimatagei.sex12i.PET12i.ethnicityi.paritycodei.intervention	a157	adj	1.00882	0.014307	0.62	0.536	0.981163	1.03725
6606	PC(42:6)_[M+OAC]1-	0.29193	.logisticgdm01a158	+ve	notadj	0.96195	0.0306528	-1.22	0.223	0.903709	1.02394	.logisticgdm01a158matbmimatagei.sex12i.PET12i.ethnicityi.paritycodei.intervention	a158	adj	0.990952	0.031402	-0.29	0.774	0.931277	1.05445
6648	PS(47:2)	0.297271	.logisticgdm01a159	+ve	notadj	1.06109	0.0501333	1.26	0.209	0.967245	1.16404	.logisticgdm01a159matbmimatagei.sex12i.PET12i.ethnicityi.paritycodei.intervention	a159	adj	1.0671	0.0527493	1.31	0.189	0.968562	1.17566
6690	PC(36:4)_[M+OAC]1- & PS(40:3)	0.31089	.logisticgdm01a160	+ve	notadj	1.11781	0.103179	1.21	0.228	0.932822	1.33949	.logisticgdm01a160matbmimatagei.sex12i.PET12i.ethnicityi.paritycodei.intervention	a160	adj	1.06804	0.101854	0.69	0.49	0.885954	1.28754
6732	Cer(42:1)_[M+OAC]1-	0.312535	.logisticgdm01a161	+ve	notadj	1.04614	0.0401543	1.18	0.24	0.970329	1.12788	.logisticgdm01a161matbmimatagei.sex12i.PET12i.ethnicityi.paritycodei.intervention	a161	adj	1.04505	0.041109	1.12	0.263	0.967502	1.12881
6774	PIP(45:5)	0.31463	.logisticgdm01a162	+ve	notadj	1.02117	0.0164095	1.3	0.192	0.989505	1.05384	.logisticgdm01a162matbmimatagei.sex12i.PET12i.ethnicityi.paritycodei.intervention	a162	adj	1.02235	0.0167466	1.35	0.177	0.990051	1.05571
6816	PC-O(16:0)_[M+Cl]1-	0.315682	.logisticgdm01a163	+ve	notadj	1.0211	0.0163938	1.3	0.193	0.989474	1.05375	.logisticgdm01a163matbmimatagei.sex12i.PET12i.ethnicityi.paritycodei.intervention	a163	adj	1.0223	0.0167308	1.35	0.178	0.990027	1.05562
6858	PC(36:1)_[M+OAC]1- & PS(40:0)	0.319989	.logisticgdm01a164	+ve	notadj	0.938235	0.0775695	-0.77	0.441	0.79788	1.10328	.logisticgdm01a164matbmimatagei.sex12i.PET12i.ethnicityi.paritycodei.intervention	a164	adj	0.941681	0.0804921	-0.7	0.482	0.796427	1.11343
6900	PE(38:1)_[M-H]1-	0.320765	.logisticgdm01a165	+ve	notadj	0.982778	0.0488877	-0.35	0.727	0.891483	1.08342	.logisticgdm01a165matbmimatagei.sex12i.PET12i.ethnicityi.paritycodei.intervention	a165	adj	0.988069	0.0513528	-0.23	0.817	0.892375	1.09402
6942	FA(18:3)_[M-H]1-	0.321876	.logisticgdm01a166	+ve	notadj	0.966991	0.0333294	-0.97	0.33	0.903824	1.03457	.logisticgdm01a166matbmimatagei.sex12i.PET12i.ethnicityi.paritycodei.intervention	a166	adj	0.953178	0.035257	-1.3	0.195	0.886521	1.02485
6984	PE(36:3)_[M-H]1-	0.322611	.logisticgdm01a167	+ve	notadj	0.912265	0.096106	-0.87	0.383	0.742075	1.12149	.logisticgdm01a167matbmimatagei.sex12i.PET12i.ethnicityi.paritycodei.intervention	a167	adj	0.923545	0.101144	-0.73	0.468	0.745139	1.14467
7026	PA(52:6) & TG_oxid(53:6)+Cl-35	0.324152	.logisticgdm01a168	+ve	notadj	0.922677	0.0618763	-1.2	0.23	0.809034	1.05228	.logisticgdm01a168matbmimatagei.sex12i.PET12i.ethnicityi.paritycodei.intervention	a168	adj	0.914416	0.0634529	-1.29	0.197	0.798137	1.04764
7068	PC(36:4)_[M+Cl]1-	0.334106	.logisticgdm01a169	+ve	notadj	1.05408	0.0515703	1.08	0.282	0.957699	1.16016	.logisticgdm01a169matbmimatagei.sex12i.PET12i.ethnicityi.paritycodei.intervention	a169	adj	1.0474	0.0537244	0.9	0.367	0.947227	1.15818
7110	CL(72:2)_[M]2-	0.334147	.logisticgdm01a170	+ve	notadj	0.973199	0.0284553	-0.93	0.353	0.918996	1.0306	.logisticgdm01a170matbmimatagei.sex12i.PET12i.ethnicityi.paritycodei.intervention	a170	adj	0.96978	0.0292198	-1.02	0.308	0.914168	1.02877
7152	PC(38:5)_[M+OAC]1- & PS(42:4)_[M-H]1-	0.334617	.logisticgdm01a171	+ve	notadj	1.09029	0.0951369	0.99	0.322	0.9189	1.29365	.logisticgdm01a171matbmimatagei.sex12i.PET12i.ethnicityi.paritycodei.intervention	a171	adj	1.05491	0.0961338	0.59	0.557	0.88236	1.2612
7194	SM(34:1)_[M+OAC]1- & TG_oxid(41:0)+Cl-37 & TG_oxid(40:4)+Acetate	0.336012	.logisticgdm01a172	+ve	notadj	0.918726	0.0876267	-0.89	0.374	0.762078	1.10757	.logisticgdm01a172matbmimatagei.sex12i.PET12i.ethnicityi.paritycodei.intervention	a172	adj	0.890756	0.0877347	-1.17	0.24	0.734379	1.08043
7236	TG(52:10)+Cl-35	0.339905	.logisticgdm01a173	+ve	notadj	1.0257	0.038375	0.68	0.498	0.953179	1.10374	.logisticgdm01a173matbmimatagei.sex12i.PET12i.ethnicityi.paritycodei.intervention	a173	adj	1.02514	0.0412881	0.62	0.538	0.947324	1.10934
7278	PG-O(36:0)_[M-H]1- & LPG(36:0)_[M]-	0.341979	.logisticgdm01a174	+ve	notadj	0.908885	0.0892606	-0.97	0.331	0.749745	1.1018	.logisticgdm01a174matbmimatagei.sex12i.PET12i.ethnicityi.paritycodei.intervention	a174	adj	0.887908	0.0900588	-1.17	0.241	0.727834	1.08319
7320	PI(38:3)	0.342473	.logisticgdm01a175	+ve	notadj	0.951632	0.0559057	-0.84	0.399	0.848132	1.06776	.logisticgdm01a175matbmimatagei.sex12i.PET12i.ethnicityi.paritycodei.intervention	a175	adj	0.964864	0.0592079	-0.58	0.56	0.855526	1.08818
7362	PC(37:1)_[M+Cl]1-	0.342602	.logisticgdm01a176	+ve	notadj	1.00778	0.0202873	0.39	0.7	0.968796	1.04834	.logisticgdm01a176matbmimatagei.sex12i.PET12i.ethnicityi.paritycodei.intervention	a176	adj	1.00103	0.0212353	0.05	0.961	0.960258	1.04352
7404	TG(65:11)+Cl-37 & TG(64:15)+Acetate & PI(50:1) & TG_oxid(64:11)+Cl-35	0.345058	.logisticgdm01a177	+ve	notadj	0.949862	0.0434966	-1.12	0.261	0.868324	1.03906	.logisticgdm01a177matbmimatagei.sex12i.PET12i.ethnicityi.paritycodei.intervention	a177	adj	0.962246	0.0462668	-0.8	0.423	0.875707	1.05734
7446	Cer(42:2)_[M+OAC]1-	0.347394	.logisticgdm01a178	+ve	notadj	1.07688	0.0591101	1.35	0.177	0.967036	1.19919	.logisticgdm01a178matbmimatagei.sex12i.PET12i.ethnicityi.paritycodei.intervention	a178	adj	1.08845	0.0629821	1.46	0.143	0.971753	1.21917
7488	PC(41:7)_[M+OAC]1- & PS(45:6)	0.357931	.logisticgdm01a179	+ve	notadj	0.933288	0.0444098	-1.45	0.147	0.850182	1.02452	.logisticgdm01a179matbmimatagei.sex12i.PET12i.ethnicityi.paritycodei.intervention	a179	adj	0.945187	0.0464143	-1.15	0.251	0.858457	1.04068
7530	PC-O(38:4)_[M+OAC]1- & PS-P_42:0)_[M-H]1-	0.365791	.logisticgdm01a180	+ve	notadj	0.968816	0.0445171	-0.69	0.491	0.885378	1.06012	.logisticgdm01a180matbmimatagei.sex12i.PET12i.ethnicityi.paritycodei.intervention	a180	adj	0.972555	0.0437353	-0.62	0.536	0.890505	1.06217
7572	SM(34:2)_[M+OAC]1- & TG_oxid(41:1)+Cl-37 & TG_oxid(40:5)+Ac & CL(76:1)_[M]2-	0.36955	.logisticgdm01a181	+ve	notadj	0.916619	0.0895121	-0.89	0.373	0.756946	1.10997	.logisticgdm01a181matbmimatagei.sex12i.PET12i.ethnicityi.paritycodei.intervention	a181	adj	0.837406	0.0855656	-1.74	0.082	0.685426	1.02308
7614	TG(62:6)+Cl-37	0.372499	.logisticgdm01a182	+ve	notadj	0.979863	0.0207613	-0.96	0.337	0.940005	1.02141	.logisticgdm01a182matbmimatagei.sex12i.PET12i.ethnicityi.paritycodei.intervention	a182	adj	0.976144	0.0226235	-1.04	0.298	0.932795	1.02151
7656	PS-P_30:1)_[M-H]1-	0.372887	.logisticgdm01a183	+ve	notadj	0.97525	0.0313129	-0.78	0.435	0.915769	1.03859	.logisticgdm01a183matbmimatagei.sex12i.PET12i.ethnicityi.paritycodei.intervention	a183	adj	0.970309	0.031835	-0.92	0.358	0.909878	1.03476
7698	PC(43:4)_[M+OAC]1- & PS(47:3)	0.384949	.logisticgdm01a184	+ve	notadj	1.03004	0.0376049	0.81	0.418	0.958911	1.10644	.logisticgdm01a184matbmimatagei.sex12i.PET12i.ethnicityi.paritycodei.intervention	a184	adj	1.01835	0.0386616	0.48	0.632	0.945327	1.09702
7740	PC(42:3)_[M+OAC]1- & PS(46:2)	0.387208	.logisticgdm01a185	+ve	notadj	1.04859	0.0527068	0.94	0.345	0.950213	1.15715	.logisticgdm01a185matbmimatagei.sex12i.PET12i.ethnicityi.paritycodei.intervention	a185	adj	1.0603	0.0551689	1.13	0.26	0.957501	1.17413
7782	PC-O(36:4)_[M+OAC]1- & PS-O(40:3)_[M-H]1-	0.392848	.logisticgdm01a186	+ve	notadj	0.931055	0.0841984	-0.79	0.43	0.779827	1.11161	.logisticgdm01a186matbmimatagei.sex12i.PET12i.ethnicityi.paritycodei.intervention	a186	adj	0.926516	0.0863387	-0.82	0.413	0.771849	1.11217
7824	PC(42:4)_[M+OAC]1- & PS(46:3)	0.394528	.logisticgdm01a187	+ve	notadj	1.05635	0.0675805	0.86	0.392	0.931862	1.19747	.logisticgdm01a187matbmimatagei.sex12i.PET12i.ethnicityi.paritycodei.intervention	a187	adj	1.0309	0.0693976	0.45	0.651	0.903479	1.1763
7866	TG_oxid(61:0)+Cl-37 & TG_oxid(60:4)+Acetate	0.396185	.logisticgdm01a188	+ve	notadj	0.988293	0.0224734	-0.52	0.605	0.945213	1.03334	.logisticgdm01a188matbmimatagei.sex12i.PET12i.ethnicityi.paritycodei.intervention	a188	adj	0.987401	0.0240124	-0.52	0.602	0.941442	1.0356
7908	PC(46:6) & PS(50:5)	0.40004	.logisticgdm01a189	+ve	notadj	0.984591	0.0239645	-0.64	0.523	0.938724	1.0327	.logisticgdm01a189matbmimatagei.sex12i.PET12i.ethnicityi.paritycodei.intervention	a189	adj	0.981923	0.0288601	-0.62	0.535	0.926956	1.04015
7950	PS(49:1)	0.400537	.logisticgdm01a190	+ve	notadj	0.915075	0.0461208	-1.76	0.078	0.829002	1.01009	.logisticgdm01a190matbmimatagei.sex12i.PET12i.ethnicityi.paritycodei.intervention	a190	adj	0.928604	0.0495764	-1.39	0.165	0.836347	1.03104
7992	PC(40:9)_[M+OAC]1- & PS(44:8)_[M-H]1- & Glc-GP(18:0/20:4(5Z,8Z,11Z,14Z)	0.400877	.logisticgdm01a191	+ve	notadj	0.945366	0.0702342	-0.76	0.45	0.817263	1.09355	.logisticgdm01a191matbmimatagei.sex12i.PET12i.ethnicityi.paritycodei.intervention	a191	adj	0.945121	0.0728652	-0.73	0.464	0.812575	1.09929
8034	TG(60:0)+Cl-37 & TG(59:4)+Acetate	0.410259	.logisticgdm01a192	+ve	notadj	1.01045	0.0107888	0.97	0.33	0.989528	1.03182	.logisticgdm01a192matbmimatagei.sex12i.PET12i.ethnicityi.paritycodei.intervention	a192	adj	1.00991	0.010835	0.92	0.358	0.988891	1.03137
8076	SM(43_1)_[M+OAC]1- & TG_oxid(50:0)+Cl-37 & TG_oxid(49:4)+Acetate	0.411295	.logisticgdm01a193	+ve	notadj	0.942869	0.0615281	-0.9	0.367	0.82967	1.07151	.logisticgdm01a193matbmimatagei.sex12i.PET12i.ethnicityi.paritycodei.intervention	a193	adj	0.943879	0.0643171	-0.85	0.397	0.825875	1.07874
8118	PC(48:3) & PS(52:2)	0.41356	.logisticgdm01a194	+ve	notadj	0.992299	0.056333	-0.14	0.892	0.887809	1.10909	.logisticgdm01a194matbmimatagei.sex12i.PET12i.ethnicityi.paritycodei.intervention	a194	adj	1.01065	0.0607657	0.18	0.86	0.898301	1.13705
8160	PC(50:0)_[M+OAC]1-	0.417989	.logisticgdm01a195	+ve	notadj	1.04123	0.0405947	1.04	0.3	0.964633	1.12392	.logisticgdm01a195matbmimatagei.sex12i.PET12i.ethnicityi.paritycodei.intervention	a195	adj	1.05096	0.0423548	1.23	0.217	0.971142	1.13734
8202	SM(40:3)_[M+OAC]1- & TG_oxid(47:2)+Cl-37 & TG_oxid(46:6)+Acetate	0.421402	.logisticgdm01a196	+ve	notadj	1.0622	0.0718647	0.89	0.372	0.930289	1.21282	.logisticgdm01a196matbmimatagei.sex12i.PET12i.ethnicityi.paritycodei.intervention	a196	adj	1.0336	0.071903	0.47	0.635	0.901853	1.18458
8244	PC(46:3) & PS(50:2)	0.421543	.logisticgdm01a197	+ve	notadj	0.960292	0.0387879	-1	0.316	0.8872	1.0394	.logisticgdm01a197matbmimatagei.sex12i.PET12i.ethnicityi.paritycodei.intervention	a197	adj	0.974649	0.0403472	-0.62	0.535	0.898694	1.05703
8286	PC-O(38:2)_[M+Cl]1-	0.423263	.logisticgdm01a198	+ve	notadj	0.959861	0.0395787	-0.99	0.32	0.885339	1.04065	.logisticgdm01a198matbmimatagei.sex12i.PET12i.ethnicityi.paritycodei.intervention	a198	adj	0.969767	0.0395465	-0.75	0.452	0.895274	1.05046
8328	PC-O(40:6)_[M+OAC]1-	0.429291	.logisticgdm01a199	+ve	notadj	1.02585	0.0481034	0.54	0.586	0.935767	1.1246	.logisticgdm01a199matbmimatagei.sex12i.PET12i.ethnicityi.paritycodei.intervention	a199	adj	1.05402	0.052122	1.06	0.287	0.956653	1.16129
8370	PG(O-20:0/22:6)	0.432828	.logisticgdm01a200	+ve	notadj	1.0059	0.0198438	0.3	0.766	0.967749	1.04555	.logisticgdm01a200matbmimatagei.sex12i.PET12i.ethnicityi.paritycodei.intervention	a200	adj	0.998759	0.0207869	-0.06	0.952	0.958838	1.04034
8411	TG(63:5)+Cl-37 & TG(62:9)+Acetate	0.442627	.logisticgdm01a201	+ve	notadj	0.978157	0.052857	-0.41	0.683	0.879856	1.08744	.logisticgdm01a201matbmimatagei.sex12i.PET12i.ethnicityi.paritycodei.intervention	a201	adj	0.994399	0.0553276	-0.1	0.92	0.891662	1.10897
8453	PE(41:5)_[M-H]1-	0.449141	.logisticgdm01a202	+ve	notadj	0.977341	0.0648946	-0.35	0.73	0.858079	1.11318	.logisticgdm01a202matbmimatagei.sex12i.PET12i.ethnicityi.paritycodei.intervention	a202	adj	0.997353	0.0682106	-0.04	0.969	0.872236	1.14042
8495	PC(22:2)_[M+OAC]1- & PS(26:1)	0.453035	.logisticgdm01a203	+ve	notadj	1.01433	0.0213737	0.68	0.5	0.97329	1.0571	.logisticgdm01a203matbmimatagei.sex12i.PET12i.ethnicityi.paritycodei.intervention	a203	adj	1.0118	0.022184	0.54	0.593	0.96924	1.05623
8537	TG_oxid(63:2)+Cl-37 & TG_oxid(62:6)+Acetate	0.455957	.logisticgdm01a204	+ve	notadj	0.987578	0.036224	-0.34	0.733	0.919073	1.06119	.logisticgdm01a204matbmimatagei.sex12i.PET12i.ethnicityi.paritycodei.intervention	a204	adj	0.959694	0.0373438	-1.06	0.29	0.889223	1.03575
8579	PC-O(18:0)_[M+OAC]1- & PIP(52:2)	0.456955	.logisticgdm01a205	+ve	notadj	0.960662	0.0631377	-0.61	0.541	0.844554	1.09273	.logisticgdm01a205matbmimatagei.sex12i.PET12i.ethnicityi.paritycodei.intervention	a205	adj	0.971399	0.0656297	-0.43	0.668	0.85092	1.10894
8621	PE-O(36:3)_[M-H]1-	0.460671	.logisticgdm01a206	+ve	notadj	1.02855	0.0643028	0.45	0.652	0.909936	1.16263	.logisticgdm01a206matbmimatagei.sex12i.PET12i.ethnicityi.paritycodei.intervention	a206	adj	1.01386	0.0666485	0.21	0.834	0.891298	1.15328
8663	PC-O(29:0)_[M+OAC]1-	0.460747	.logisticgdm01a207	+ve	notadj	1.00956	0.0199172	0.48	0.63	0.971264	1.04936	.logisticgdm01a207matbmimatagei.sex12i.PET12i.ethnicityi.paritycodei.intervention	a207	adj	1.00413	0.0207491	0.2	0.842	0.964274	1.04563
8705	PA(45:7) & TG_oxid(46:7)+Cl-35	0.461564	.logisticgdm01a208	+ve	notadj	0.947168	0.0926274	-0.56	0.579	0.78196	1.14728	.logisticgdm01a208matbmimatagei.sex12i.PET12i.ethnicityi.paritycodei.intervention	a208	adj	1.01588	0.105156	0.15	0.879	0.829339	1.24438
8747	SM(32:2)_[M+OAC]1- & TG_oxid(39:1)+Cl-37 & TG_oxid(38:5)+Acetate	0.462397	.logisticgdm01a209	+ve	notadj	0.953749	0.0532684	-0.85	0.397	0.854856	1.06408	.logisticgdm01a209matbmimatagei.sex12i.PET12i.ethnicityi.paritycodei.intervention	a209	adj	0.909446	0.0533305	-1.62	0.106	0.810703	1.02022
8789	SM(40:2)_[M+OAC]1- & TG_oxid(47:1)+Cl-37 & TG_oxid(46:5)+Acetate	0.469401	.logisticgdm01a210	+ve	notadj	0.927643	0.0956967	-0.73	0.467	0.757826	1.13551	.logisticgdm01a210matbmimatagei.sex12i.PET12i.ethnicityi.paritycodei.intervention	a210	adj	0.888226	0.0941712	-1.12	0.264	0.721569	1.09337
8831	PS(27:0)	0.471156	.logisticgdm01a211	+ve	notadj	0.981267	0.0318247	-0.58	0.56	0.920833	1.04567	.logisticgdm01a211matbmimatagei.sex12i.PET12i.ethnicityi.paritycodei.intervention	a211	adj	0.98563	0.0342432	-0.42	0.677	0.920749	1.05508
8873	PC(44:3)_[M+OAC]1- & PS(48:2)	0.471481	.logisticgdm01a212	+ve	notadj	1.10288	0.0693965	1.56	0.12	0.974917	1.24764	.logisticgdm01a212matbmimatagei.sex12i.PET12i.ethnicityi.paritycodei.intervention	a212	adj	1.1316	0.0748125	1.87	0.061	0.994071	1.28815
8915	PG-O(42:0)_[M-H]1-	0.474677	.logisticgdm01a213	+ve	notadj	1.03061	0.0493309	0.63	0.529	0.938324	1.13198	.logisticgdm01a213matbmimatagei.sex12i.PET12i.ethnicityi.paritycodei.intervention	a213	adj	1.06647	0.0520602	1.32	0.187	0.969162	1.17355
8957	PC-P_36:5)_[M+OAC]1- & PS-O(40:5)_[M-H]1-	0.48313	.logisticgdm01a214	+ve	notadj	1.03553	0.041171	0.88	0.38	0.9579	1.11945	.logisticgdm01a214matbmimatagei.sex12i.PET12i.ethnicityi.paritycodei.intervention	a214	adj	1.04054	0.0428457	0.97	0.334	0.959863	1.128
8999	TG(65:6)+Cl-37 & TG(64:10)+Acetate	0.486132	.logisticgdm01a215	+ve	notadj	0.974534	0.055947	-0.45	0.653	0.870824	1.09059	.logisticgdm01a215matbmimatagei.sex12i.PET12i.ethnicityi.paritycodei.intervention	a215	adj	0.96784	0.057936	-0.55	0.585	0.860695	1.08832
9041	CL(74:3)_[M]2-	0.490256	.logisticgdm01a216	+ve	notadj	1.1007	0.115729	0.91	0.361	0.895718	1.35258	.logisticgdm01a216matbmimatagei.sex12i.PET12i.ethnicityi.paritycodei.intervention	a216	adj	1.06947	0.11736	0.61	0.541	0.862501	1.3261
9083	PC(34:2)_[M+Cl]1-	0.492541	.logisticgdm01a217	+ve	notadj	1.0417	0.0544037	0.78	0.434	0.940344	1.15397	.logisticgdm01a217matbmimatagei.sex12i.PET12i.ethnicityi.paritycodei.intervention	a217	adj	1.043	0.0576402	0.76	0.446	0.935932	1.16232
9125	FA(22:6)_[M-H]1-	0.492551	.logisticgdm01a218	+ve	notadj	1.01355	0.0269886	0.51	0.613	0.962009	1.06785	.logisticgdm01a218matbmimatagei.sex12i.PET12i.ethnicityi.paritycodei.intervention	a218	adj	0.998606	0.0298309	-0.05	0.963	0.941818	1.05882
9167	PC(34:3)_[M+OAC]1- & PS(38:2)	0.494078	.logisticgdm01a219	+ve	notadj	0.938609	0.0957476	-0.62	0.535	0.768517	1.14635	.logisticgdm01a219matbmimatagei.sex12i.PET12i.ethnicityi.paritycodei.intervention	a219	adj	1.00283	0.108383	0.03	0.979	0.811396	1.23943
9209	SM(38:3)_[M+OAC]1- & TG_oxid(45:2)+Cl-37 & TG_oxid(44:6)+Ac	0.497026	.logisticgdm01a220	+ve	notadj	1.01852	0.0350072	0.53	0.594	0.952162	1.08949	.logisticgdm01a220matbmimatagei.sex12i.PET12i.ethnicityi.paritycodei.intervention	a220	adj	1.01183	0.036082	0.33	0.742	0.943524	1.08508
9251	PS(31:3)_[M-H]1-	0.497209	.logisticgdm01a221	+ve	notadj	1.01356	0.0161179	0.85	0.397	0.982454	1.04564	.logisticgdm01a221matbmimatagei.sex12i.PET12i.ethnicityi.paritycodei.intervention	a221	adj	1.01454	0.016958	0.86	0.388	0.981842	1.04833
9293	PC(37:2)_[M+OAC]1- / PS(41:1)_[M-H]1-	0.502855	.logisticgdm01a222	+ve	notadj	1.10046	0.0911883	1.16	0.248	0.935492	1.29452	.logisticgdm01a222matbmimatagei.sex12i.PET12i.ethnicityi.paritycodei.intervention	a222	adj	1.09481	0.0942499	1.05	0.293	0.92483	1.29604
9335	PE(35:2)_[M-H]1-	0.503212	.logisticgdm01a223	+ve	notadj	0.981959	0.0280343	-0.64	0.524	0.928521	1.03847	.logisticgdm01a223matbmimatagei.sex12i.PET12i.ethnicityi.paritycodei.intervention	a223	adj	0.976554	0.028884	-0.8	0.422	0.921553	1.03484
9377	PC-P_34:4)_[M+OAC]1- & PS-O(38:4)_[M-H]1-	0.514334	.logisticgdm01a224	+ve	notadj	1.03256	0.0471219	0.7	0.483	0.944218	1.12918	.logisticgdm01a224matbmimatagei.sex12i.PET12i.ethnicityi.paritycodei.intervention	a224	adj	1.0572	0.0501514	1.17	0.241	0.963332	1.1602
9419	TG_oxid(58:3)+Acetate	0.521252	.logisticgdm01a225	+ve	notadj	0.94	0.039076	-1.49	0.137	0.86645	1.0198	.logisticgdm01a225matbmimatagei.sex12i.PET12i.ethnicityi.paritycodei.intervention	a225	adj	0.93315	0.04048	-1.59	0.111	0.85709	1.01596
9461	PC-P_39:1)_[M+Cl]1-	0.522124	.logisticgdm01a226	+ve	notadj	1.02774	0.0431009	0.65	0.514	0.946646	1.11579	.logisticgdm01a226matbmimatagei.sex12i.PET12i.ethnicityi.paritycodei.intervention	a226	adj	1.05222	0.0455893	1.17	0.24	0.96656	1.14548
9503	PC(35:4)_[M+OAC]1- / PS(39:3)_[M-H]1-	0.524205	.logisticgdm01a227	+ve	notadj	0.959339	0.0761744	-0.52	0.601	0.821078	1.12088	.logisticgdm01a227matbmimatagei.sex12i.PET12i.ethnicityi.paritycodei.intervention	a227	adj	0.934492	0.0770157	-0.82	0.411	0.795104	1.09831
9545	SM(38:1)_[M+OAC]1- & TG_oxid(45:0)+Cl-37 & TG_oxid(44:4)+Acetate	0.528889	.logisticgdm01a228	+ve	notadj	0.943277	0.096424	-0.57	0.568	0.772018	1.15253	.logisticgdm01a228matbmimatagei.sex12i.PET12i.ethnicityi.paritycodei.intervention	a228	adj	0.952338	0.0993413	-0.47	0.64	0.776247	1.16838
9587	PA(49:5) & TG_oxid(50:5)+Cl-35	0.532581	.logisticgdm01a229	+ve	notadj	1.00327	0.0284049	0.12	0.908	0.949116	1.06052	.logisticgdm01a229matbmimatagei.sex12i.PET12i.ethnicityi.paritycodei.intervention	a229	adj	1.00776	0.0298748	0.26	0.794	0.950874	1.06805
9629	PC(33:4)_[M+OAC]1- / PS(37:3)_[M-H]1-	0.5394	.logisticgdm01a230	+ve	notadj	0.979682	0.02372	-0.85	0.397	0.934277	1.02729	.logisticgdm01a230matbmimatagei.sex12i.PET12i.ethnicityi.paritycodei.intervention	a230	adj	0.982614	0.0238756	-0.72	0.47	0.936916	1.03054
9671	PI(36:3)	0.543244	.logisticgdm01a231	+ve	notadj	0.976281	0.035645	-0.66	0.511	0.908859	1.0487	.logisticgdm01a231matbmimatagei.sex12i.PET12i.ethnicityi.paritycodei.intervention	a231	adj	0.972584	0.0359626	-0.75	0.452	0.904592	1.04569
9713	PS-P_32:1)_[M-H]1-	0.554827	.logisticgdm01a232	+ve	notadj	0.990815	0.0139945	-0.65	0.514	0.963763	1.01863	.logisticgdm01a232matbmimatagei.sex12i.PET12i.ethnicityi.paritycodei.intervention	a232	adj	0.991617	0.0161801	-0.52	0.606	0.960406	1.02384
9755	TG(61:8)+Cl-37 & TG(60:12)+Acetate	0.554956	.logisticgdm01a233	+ve	notadj	0.986516	0.037059	-0.36	0.718	0.916492	1.06189	.logisticgdm01a233matbmimatagei.sex12i.PET12i.ethnicityi.paritycodei.intervention	a233	adj	0.990708	0.0388359	-0.24	0.812	0.917442	1.06983
9797	TG(64:11)+Acetate	0.556918	.logisticgdm01a234	+ve	notadj	1.04787	0.046174	1.06	0.289	0.961171	1.1424	.logisticgdm01a234matbmimatagei.sex12i.PET12i.ethnicityi.paritycodei.intervention	a234	adj	1.04879	0.0488703	1.02	0.307	0.957255	1.14909
9839	PS(31:3)	0.561231	.logisticgdm01a235	+ve	notadj	1.01235	0.0162126	0.77	0.443	0.981066	1.04463	.logisticgdm01a235matbmimatagei.sex12i.PET12i.ethnicityi.paritycodei.intervention	a235	adj	1.0133	0.0171362	0.78	0.435	0.980261	1.04745
9881	PC-O(32:1)_[M+OAC]1- & PS-O(36:0)_[M-H]1-	0.562233	.logisticgdm01a236	+ve	notadj	0.996149	0.0667648	-0.06	0.954	0.873523	1.13599	.logisticgdm01a236matbmimatagei.sex12i.PET12i.ethnicityi.paritycodei.intervention	a236	adj	1.0147	0.0703459	0.21	0.833	0.885784	1.16238
9923	PC(46:1)_[M+OAC]1- & PS(50:0)	0.56392	.logisticgdm01a237	+ve	notadj	0.999411	0.039034	-0.02	0.988	0.925761	1.07892	.logisticgdm01a237matbmimatagei.sex12i.PET12i.ethnicityi.paritycodei.intervention	a237	adj	0.998875	0.0382912	-0.03	0.977	0.926575	1.07682
9965	FA(22:4)_[M-H]1-	0.570094	.logisticgdm01a238	+ve	notadj	1.01805	0.0260031	0.7	0.484	0.96834	1.07031	.logisticgdm01a238matbmimatagei.sex12i.PET12i.ethnicityi.paritycodei.intervention	a238	adj	1.00389	0.0271677	0.14	0.886	0.952034	1.05858
10007	TG_oxid(56:8)+Cl-35	0.570174	.logisticgdm01a239	+ve	notadj	1.05276	0.0695829	0.78	0.437	0.924847	1.19837	.logisticgdm01a239matbmimatagei.sex12i.PET12i.ethnicityi.paritycodei.intervention	a239	adj	1.07331	0.0738869	1.03	0.304	0.937839	1.22835
10049	TG_oxid(65:1)+Cl-37 & TG_oxid(64:5)+Acetate	0.572422	.logisticgdm01a240	+ve	notadj	1.05077	0.0378913	1.37	0.17	0.979065	1.12772	.logisticgdm01a240matbmimatagei.sex12i.PET12i.ethnicityi.paritycodei.intervention	a240	adj	1.04663	0.0387466	1.23	0.218	0.973377	1.12539
10091	PA(45:6) & TG_oxid(46:6)+Cl-35	0.57507	.logisticgdm01a241	+ve	notadj	1.08367	0.112592	0.77	0.439	0.884013	1.32842	.logisticgdm01a241matbmimatagei.sex12i.PET12i.ethnicityi.paritycodei.intervention	a241	adj	1.04321	0.112363	0.39	0.695	0.844671	1.28841
10133	PI(40:6)	0.582269	.logisticgdm01a242	+ve	notadj	0.955034	0.067183	-0.65	0.513	0.832032	1.09622	.logisticgdm01a242matbmimatagei.sex12i.PET12i.ethnicityi.paritycodei.intervention	a242	adj	0.928045	0.0690787	-1	0.316	0.802066	1.07381
10175	TG(63:7)+Cl-37 & TG(62:11)+Acetate	0.588802	.logisticgdm01a243	+ve	notadj	1.00024	0.0612695	0	0.997	0.887082	1.12783	.logisticgdm01a243matbmimatagei.sex12i.PET12i.ethnicityi.paritycodei.intervention	a243	adj	0.988994	0.0641508	-0.17	0.865	0.870925	1.12307
10217	PE(40:7)_[M-H]1-	0.593454	.logisticgdm01a244	+ve	notadj	1.03278	0.0521608	0.64	0.523	0.935445	1.14025	.logisticgdm01a244matbmimatagei.sex12i.PET12i.ethnicityi.paritycodei.intervention	a244	adj	1.03103	0.0539129	0.58	0.559	0.930597	1.1423
10259	PG(46:9)	0.594486	.logisticgdm01a245	+ve	notadj	1.06047	0.0942283	0.66	0.509	0.890971	1.26221	.logisticgdm01a245matbmimatagei.sex12i.PET12i.ethnicityi.paritycodei.intervention	a245	adj	1.05512	0.098635	0.57	0.566	0.878473	1.26728
10301	PA(47:6) & TG_oxid(48:6)+Cl-35	0.602067	.logisticgdm01a246	+ve	notadj	0.966003	0.0941992	-0.35	0.723	0.797947	1.16945	.logisticgdm01a246matbmimatagei.sex12i.PET12i.ethnicityi.paritycodei.intervention	a246	adj	0.946917	0.0960105	-0.54	0.591	0.776258	1.15509
10343	TG(42:4)+Cl-37	0.602357	.logisticgdm01a247	+ve	notadj	1.03371	0.068297	0.5	0.616	0.908157	1.17663	.logisticgdm01a247matbmimatagei.sex12i.PET12i.ethnicityi.paritycodei.intervention	a247	adj	0.978637	0.0717023	-0.29	0.768	0.847727	1.12976
10385	PC(48:6) & PS(52:5)	0.613639	.logisticgdm01a248	+ve	notadj	0.985179	0.0359355	-0.41	0.682	0.917206	1.05819	.logisticgdm01a248matbmimatagei.sex12i.PET12i.ethnicityi.paritycodei.intervention	a248	adj	0.984725	0.0376715	-0.4	0.687	0.913591	1.0614
10427	PC(42:2)_[M+OAC]1- & PS(46:1)	0.61526	.logisticgdm01a249	+ve	notadj	1.07295	0.0860618	0.88	0.38	0.916862	1.25561	.logisticgdm01a249matbmimatagei.sex12i.PET12i.ethnicityi.paritycodei.intervention	a249	adj	1.06221	0.0886575	0.72	0.47	0.901918	1.251
10469	PC(32:0)_[M+OAC]1-	0.620168	.logisticgdm01a250	+ve	notadj	1.07275	0.113658	0.66	0.507	0.871589	1.32033	.logisticgdm01a250matbmimatagei.sex12i.PET12i.ethnicityi.paritycodei.intervention	a250	adj	1.01103	0.11043	0.1	0.92	0.816186	1.25238
10511	PC(44:0)_[M+OAC]1-	0.62324	.logisticgdm01a251	+ve	notadj	1.03905	0.0431431	0.92	0.356	0.957836	1.12714	.logisticgdm01a251matbmimatagei.sex12i.PET12i.ethnicityi.paritycodei.intervention	a251	adj	1.06898	0.0474875	1.5	0.133	0.979842	1.16623
10553	TG_oxid(47:5)+Cl-37	0.62512	.logisticgdm01a252	+ve	notadj	0.976852	0.0276711	-0.83	0.408	0.924096	1.03262	.logisticgdm01a252matbmimatagei.sex12i.PET12i.ethnicityi.paritycodei.intervention	a252	adj	0.987167	0.0287928	-0.44	0.658	0.932317	1.04524
10595	PC(36:3)_[M+Cl]1-	0.62972	.logisticgdm01a253	+ve	notadj	1.03045	0.0484995	0.64	0.524	0.939647	1.13003	.logisticgdm01a253matbmimatagei.sex12i.PET12i.ethnicityi.paritycodei.intervention	a253	adj	1.05017	0.0522296	0.98	0.325	0.952629	1.15769
10637	PE-O(34:3)_[M-H]1-	0.630204	.logisticgdm01a254	+ve	notadj	1.02022	0.0446638	0.46	0.647	0.93633	1.11162	.logisticgdm01a254matbmimatagei.sex12i.PET12i.ethnicityi.paritycodei.intervention	a254	adj	1.01423	0.0459317	0.31	0.755	0.92809	1.10838
10679	PC-P_33:2)_[M+OAC]1- / PS-O(37:2)_[M-H]1-	0.633204	.logisticgdm01a255	+ve	notadj	0.989279	0.0158243	-0.67	0.5	0.958745	1.02079	.logisticgdm01a255matbmimatagei.sex12i.PET12i.ethnicityi.paritycodei.intervention	a255	adj	0.991444	0.0167284	-0.51	0.611	0.959193	1.02478
10721	PC(28:2)_[M+OAc]1- & PS(32:1)	0.635393	.logisticgdm01a256	+ve	notadj	0.984099	0.0221511	-0.71	0.476	0.941627	1.02849	.logisticgdm01a256matbmimatagei.sex12i.PET12i.ethnicityi.paritycodei.intervention	a256	adj	0.982879	0.0229904	-0.74	0.46	0.938836	1.02899
10763	PC-O(34:3)_[M+OAC]1- & PS-O(38:2)_[M-H]1-	0.639415	.logisticgdm01a257	+ve	notadj	0.983015	0.03852	-0.44	0.662	0.910344	1.06149	.logisticgdm01a257matbmimatagei.sex12i.PET12i.ethnicityi.paritycodei.intervention	a257	adj	0.973141	0.0450533	-0.59	0.556	0.888726	1.06557
10805	SM(40:1)_[M+OAC]1- & TG_oxid(47:0)+Cl-37 & TG_oxid(46:4)+Acetate	0.63959	.logisticgdm01a258	+ve	notadj	1.06075	0.104104	0.6	0.548	0.875128	1.28573	.logisticgdm01a258matbmimatagei.sex12i.PET12i.ethnicityi.paritycodei.intervention	a258	adj	1.04864	0.105651	0.47	0.637	0.860728	1.27757
10847	TG_oxid(56:3)+Acetate	0.639933	.logisticgdm01a259	+ve	notadj	1.02148	0.0274133	0.79	0.428	0.969139	1.07665	.logisticgdm01a259matbmimatagei.sex12i.PET12i.ethnicityi.paritycodei.intervention	a259	adj	1.02364	0.0294624	0.81	0.417	0.967488	1.08304
10889	PA(50:7) & TG_oxid(51:7)+Cl-35	0.640722	.logisticgdm01a260	+ve	notadj	0.980529	0.0338407	-0.57	0.569	0.916396	1.04915	.logisticgdm01a260matbmimatagei.sex12i.PET12i.ethnicityi.paritycodei.intervention	a260	adj	0.983729	0.0354159	-0.46	0.649	0.916707	1.05565
10931	PS(29:0)	0.644541	.logisticgdm01a261	+ve	notadj	0.988611	0.0247638	-0.46	0.647	0.941248	1.03836	.logisticgdm01a261matbmimatagei.sex12i.PET12i.ethnicityi.paritycodei.intervention	a261	adj	0.987099	0.0255905	-0.5	0.616	0.938196	1.03855
10973	Cer(42:1)_[M+Cl]1-	0.644699	.logisticgdm01a262	+ve	notadj	1.01499	0.0276958	0.55	0.586	0.962132	1.07075	.logisticgdm01a262matbmimatagei.sex12i.PET12i.ethnicityi.paritycodei.intervention	a262	adj	1.0249	0.0291471	0.86	0.387	0.96934	1.08365
11015	PC(34:2)_[M+OAC]1- & PS(38:1)_[M-H]1-	0.648228	.logisticgdm01a263	+ve	notadj	1.07051	0.109939	0.66	0.507	0.875331	1.3092	.logisticgdm01a263matbmimatagei.sex12i.PET12i.ethnicityi.paritycodei.intervention	a263	adj	1.03121	0.10991	0.29	0.773	0.836799	1.27078
11057	PE(36:2) & CL(74:4)	0.656734	.logisticgdm01a264	+ve	notadj	1.07233	0.113292	0.66	0.509	0.871761	1.31904	.logisticgdm01a264matbmimatagei.sex12i.PET12i.ethnicityi.paritycodei.intervention	a264	adj	1.03991	0.114635	0.36	0.723	0.837849	1.29071
11099	PC(39:6)_[M+OAC]1- & PS(43:5)	0.656978	.logisticgdm01a265	+ve	notadj	0.944625	0.0933214	-0.58	0.564	0.778337	1.14644	.logisticgdm01a265matbmimatagei.sex12i.PET12i.ethnicityi.paritycodei.intervention	a265	adj	0.88123	0.0943506	-1.18	0.238	0.71442	1.08699
11141	PC(39:2)_[M+Cl]1-	0.65872	.logisticgdm01a266	+ve	notadj	1.01751	0.0241107	0.73	0.464	0.971337	1.06588	.logisticgdm01a266matbmimatagei.sex12i.PET12i.ethnicityi.paritycodei.intervention	a266	adj	1.02165	0.0247554	0.88	0.377	0.974264	1.07134
11183	PC(37:5)_[M+OAC]1- / PS(41:4)_[M-H]1-	0.660239	.logisticgdm01a267	+ve	notadj	0.945568	0.0780066	-0.68	0.497	0.804398	1.11151	.logisticgdm01a267matbmimatagei.sex12i.PET12i.ethnicityi.paritycodei.intervention	a267	adj	0.919577	0.07923	-0.97	0.331	0.776693	1.08875
11225	PG(36:1) & TG(44:6)+Cl-37	0.6626	.logisticgdm01a268	+ve	notadj	1.01544	0.0414206	0.38	0.707	0.937419	1.09996	.logisticgdm01a268matbmimatagei.sex12i.PET12i.ethnicityi.paritycodei.intervention	a268	adj	0.973658	0.0439459	-0.59	0.554	0.891226	1.06371
11267	TG_oxid(66:8)+Cl-35	0.663167	.logisticgdm01a269	+ve	notadj	1.04121	0.0414202	1.02	0.31	0.963111	1.12564	.logisticgdm01a269matbmimatagei.sex12i.PET12i.ethnicityi.paritycodei.intervention	a269	adj	1.05754	0.0432545	1.37	0.171	0.976069	1.1458
11309	PC(38:2)_[M+OAC]1- & PS(42:1)_[M-H]1-	0.666738	.logisticgdm01a270	+ve	notadj	0.974271	0.0875955	-0.29	0.772	0.816864	1.16201	.logisticgdm01a270matbmimatagei.sex12i.PET12i.ethnicityi.paritycodei.intervention	a270	adj	0.950612	0.0895942	-0.54	0.591	0.790275	1.14348
11351	TG_oxid(46:4)+Cl-37	0.671462	.logisticgdm01a271	+ve	notadj	0.991927	0.0238728	-0.34	0.736	0.946223	1.03984	.logisticgdm01a271matbmimatagei.sex12i.PET12i.ethnicityi.paritycodei.intervention	a271	adj	0.992301	0.0234351	-0.33	0.743	0.947416	1.03931
11393	PE(37:1)_[M-H]1-	0.671634	.logisticgdm01a272	+ve	notadj	1.00075	0.0276448	0.03	0.978	0.948005	1.05642	.logisticgdm01a272matbmimatagei.sex12i.PET12i.ethnicityi.paritycodei.intervention	a272	adj	1.01269	0.0286883	0.45	0.656	0.957994	1.07051
11435	PC(26:0)_[M+OAC]1- & PS(30:1)	0.675343	.logisticgdm01a273	+ve	notadj	0.992004	0.0345301	-0.23	0.818	0.926584	1.06204	.logisticgdm01a273matbmimatagei.sex12i.PET12i.ethnicityi.paritycodei.intervention	a273	adj	0.987805	0.0353827	-0.34	0.732	0.920835	1.05965
11477	LPE(20:3)_[M-H]1-	0.682617	.logisticgdm01a274	+ve	notadj	0.985041	0.0224542	-0.66	0.508	0.942	1.03005	.logisticgdm01a274matbmimatagei.sex12i.PET12i.ethnicityi.paritycodei.intervention	a274	adj	0.991077	0.0231852	-0.38	0.702	0.946661	1.03758
11519	TG_oxid(53:1)+Cl-37 & TG_oxid(52:5)+Acetate	0.709475	.logisticgdm01a275	+ve	notadj	0.941476	0.0548071	-1.04	0.3	0.839958	1.05526	.logisticgdm01a275matbmimatagei.sex12i.PET12i.ethnicityi.paritycodei.intervention	a275	adj	0.955951	0.0593455	-0.73	0.468	0.846434	1.07964
11561	PC(36:2)_[M+Cl]1-	0.710655	.logisticgdm01a276	+ve	notadj	1.0205	0.0472836	0.44	0.661	0.931911	1.11751	.logisticgdm01a276matbmimatagei.sex12i.PET12i.ethnicityi.paritycodei.intervention	a276	adj	1.02651	0.0504405	0.53	0.594	0.932255	1.13028
11603	PC-O(37:2)_[M+Cl]1-	0.711296	.logisticgdm01a277	+ve	notadj	1.06553	0.107681	0.63	0.53	0.874063	1.29893	.logisticgdm01a277matbmimatagei.sex12i.PET12i.ethnicityi.paritycodei.intervention	a277	adj	1.11687	0.11889	1.04	0.299	0.906554	1.37598
11645	PC(40:2)_[M+OAC]1- & PS(44:1)_[M-H]1-	0.711744	.logisticgdm01a278	+ve	notadj	1.05495	0.0785946	0.72	0.473	0.911628	1.22081	.logisticgdm01a278matbmimatagei.sex12i.PET12i.ethnicityi.paritycodei.intervention	a278	adj	1.05384	0.0818323	0.68	0.499	0.905064	1.22708
11687	CL(72:1)_[M]2-	0.711966	.logisticgdm01a279	+ve	notadj	0.984074	0.0526621	-0.3	0.764	0.886087	1.0929	.logisticgdm01a279matbmimatagei.sex12i.PET12i.ethnicityi.paritycodei.intervention	a279	adj	0.950097	0.0540484	-0.9	0.368	0.849857	1.06216
11729	PC(34:1)_[M+Cl]1-	0.718264	.logisticgdm01a280	+ve	notadj	1.02468	0.0510724	0.49	0.625	0.929318	1.12984	.logisticgdm01a280matbmimatagei.sex12i.PET12i.ethnicityi.paritycodei.intervention	a280	adj	1.05185	0.0552945	0.96	0.336	0.948877	1.16601
11771	PI(40:5)	0.7197	.logisticgdm01a281	+ve	notadj	0.991547	0.0208721	-0.4	0.687	0.951471	1.03331	.logisticgdm01a281matbmimatagei.sex12i.PET12i.ethnicityi.paritycodei.intervention	a281	adj	0.989483	0.0210093	-0.5	0.619	0.94915	1.03153
11813	PC(37:3)_[M+OAC]1- / PS(41:2)_[M-H]1-	0.723426	.logisticgdm01a282	+ve	notadj	0.986899	0.0800541	-0.16	0.871	0.841833	1.15696	.logisticgdm01a282matbmimatagei.sex12i.PET12i.ethnicityi.paritycodei.intervention	a282	adj	1.01363	0.0869373	0.16	0.875	0.856792	1.19919
11855	TG(60:14)+Acetate & PI(46:0)	0.727479	.logisticgdm01a283	+ve	notadj	1.01135	0.033288	0.34	0.732	0.948164	1.07874	.logisticgdm01a283matbmimatagei.sex12i.PET12i.ethnicityi.paritycodei.intervention	a283	adj	1.01286	0.0349416	0.37	0.711	0.946644	1.08372
11897	SM(36:1)_[M+OAC]1- & TG_oxid(43:0)+Cl-37 & TG_oxid(42:4)+Acetate	0.728908	.logisticgdm01a284	+ve	notadj	1.04351	0.0962993	0.46	0.644	0.870851	1.2504	.logisticgdm01a284matbmimatagei.sex12i.PET12i.ethnicityi.paritycodei.intervention	a284	adj	1.02724	0.0977482	0.28	0.778	0.85246	1.23785
11939	TG(61:9)+Cl-37 & TG(60:13)+Acetate	0.731715	.logisticgdm01a285	+ve	notadj	0.990814	0.0312027	-0.29	0.769	0.931507	1.0539	.logisticgdm01a285matbmimatagei.sex12i.PET12i.ethnicityi.paritycodei.intervention	a285	adj	0.99626	0.0329148	-0.11	0.91	0.933793	1.06291
11981	PA(52:7) & TG_oxid(53:7)+Cl-35	0.73216	.logisticgdm01a286	+ve	notadj	0.964928	0.0372534	-0.92	0.355	0.894606	1.04078	.logisticgdm01a286matbmimatagei.sex12i.PET12i.ethnicityi.paritycodei.intervention	a286	adj	0.97589	0.0388962	-0.61	0.54	0.902556	1.05518
12023	PC(22:1)_[M+Cl]1-	0.732351	.logisticgdm01a287	+ve	notadj	0.987409	0.0236914	-0.53	0.597	0.94205	1.03495	.logisticgdm01a287matbmimatagei.sex12i.PET12i.ethnicityi.paritycodei.intervention	a287	adj	0.986521	0.0244371	-0.55	0.584	0.93977	1.0356
12065	PC(40:3)_[M+OAC]1- & PS(44:2)_[M-H]1-	0.734865	.logisticgdm01a288	+ve	notadj	0.99379	0.0165449	-0.37	0.708	0.961886	1.02675	.logisticgdm01a288matbmimatagei.sex12i.PET12i.ethnicityi.paritycodei.intervention	a288	adj	0.998275	0.0165464	-0.1	0.917	0.966366	1.03124
12107	CL(70:1)_[M]2-	0.73502	.logisticgdm01a289	+ve	notadj	0.960695	0.084427	-0.46	0.648	0.808687	1.14127	.logisticgdm01a289matbmimatagei.sex12i.PET12i.ethnicityi.paritycodei.intervention	a289	adj	0.973822	0.0922729	-0.28	0.78	0.80877	1.17256
12149	TG(46:7)+Cl-35	0.735391	.logisticgdm01a290	+ve	notadj	0.983961	0.0661324	-0.24	0.81	0.862518	1.1225	.logisticgdm01a290matbmimatagei.sex12i.PET12i.ethnicityi.paritycodei.intervention	a290	adj	0.96695	0.0673061	-0.48	0.629	0.843635	1.10829
12191	PC(39:2)_[M+OAC]1- / PS(43:1)_[M-H]1-	0.739009	.logisticgdm01a291	+ve	notadj	1.00269	0.050115	0.05	0.957	0.909122	1.10588	.logisticgdm01a291matbmimatagei.sex12i.PET12i.ethnicityi.paritycodei.intervention	a291	adj	0.990571	0.0520173	-0.18	0.857	0.89369	1.09795
12233	PE(38:2)_[M-H]1-	0.744874	.logisticgdm01a292	+ve	notadj	0.987717	0.0973106	-0.13	0.9	0.814276	1.1981	.logisticgdm01a292matbmimatagei.sex12i.PET12i.ethnicityi.paritycodei.intervention	a292	adj	0.990153	0.102077	-0.1	0.924	0.809003	1.21186
12275	SM(42:2)_[M+OAC]1- & TG_oxid(49:1)+Cl-37 & TG_oxid(48:5)+Acetate	0.745933	.logisticgdm01a293	+ve	notadj	0.98291	0.0939928	-0.18	0.857	0.814921	1.18553	.logisticgdm01a293matbmimatagei.sex12i.PET12i.ethnicityi.paritycodei.intervention	a293	adj	0.979577	0.0964698	-0.21	0.834	0.807628	1.18813
12317	SM(36:2)_[M+OAC]1- & TG_oxid(43:1)+Cl-37 & TG_oxid(42:5)+Acetate	0.746227	.logisticgdm01a294	+ve	notadj	0.974526	0.0911447	-0.28	0.783	0.811303	1.17059	.logisticgdm01a294matbmimatagei.sex12i.PET12i.ethnicityi.paritycodei.intervention	a294	adj	0.919543	0.089799	-0.86	0.39	0.759358	1.11352
12359	TG(65:8)+Cl-37	0.749241	.logisticgdm01a295	+ve	notadj	0.996932	0.0561114	-0.05	0.956	0.892804	1.1132	.logisticgdm01a295matbmimatagei.sex12i.PET12i.ethnicityi.paritycodei.intervention	a295	adj	0.975316	0.0572076	-0.43	0.67	0.869396	1.09414
12401	TG(52:5)+Cl-35	0.753076	.logisticgdm01a296	+ve	notadj	0.991325	0.0360743	-0.24	0.811	0.923083	1.06461	.logisticgdm01a296matbmimatagei.sex12i.PET12i.ethnicityi.paritycodei.intervention	a296	adj	0.983992	0.038028	-0.42	0.676	0.912211	1.06142
12443	PE(34:1)_[M-H]1-	0.753691	.logisticgdm01a297	+ve	notadj	1.04335	0.102941	0.43	0.667	0.859897	1.26594	.logisticgdm01a297matbmimatagei.sex12i.PET12i.ethnicityi.paritycodei.intervention	a297	adj	1.07822	0.111584	0.73	0.467	0.88027	1.32068
12485	SM(43_2)_[M+OAC]1- & TG_oxid(50:1)+Cl-37 & TG_oxid(49:5)+Acetate	0.754459	.logisticgdm01a298	+ve	notadj	0.98504	0.0674189	-0.22	0.826	0.861381	1.12645	.logisticgdm01a298matbmimatagei.sex12i.PET12i.ethnicityi.paritycodei.intervention	a298	adj	0.991235	0.0705938	-0.12	0.902	0.862097	1.13972
12527	PA(47:7) & TG_oxid(48:7)+Cl-35	0.754914	.logisticgdm01a299	+ve	notadj	1.05402	0.0980482	0.57	0.572	0.878349	1.26482	.logisticgdm01a299matbmimatagei.sex12i.PET12i.ethnicityi.paritycodei.intervention	a299	adj	1.07869	0.10719	0.76	0.446	0.887791	1.31063
12569	SM(42:1)_[M+OAC]1- & TG_oxid(49:0)+Cl-37 & TG_oxid(48:4)+Acetate	0.76539	.logisticgdm01a300	+ve	notadj	0.973099	0.0947505	-0.28	0.779	0.804036	1.17771	.logisticgdm01a300matbmimatagei.sex12i.PET12i.ethnicityi.paritycodei.intervention	a300	adj	0.942547	0.0950403	-0.59	0.557	0.773523	1.1485
12611	TG(41:3)+Cl-37	0.76646	.logisticgdm01a301	+ve	notadj	0.986708	0.0354686	-0.37	0.71	0.919584	1.05873	.logisticgdm01a301matbmimatagei.sex12i.PET12i.ethnicityi.paritycodei.intervention	a301	adj	0.991767	0.0371648	-0.22	0.825	0.921536	1.06735
12653	TG(52:4)+Cl-35	0.777855	.logisticgdm01a302	+ve	notadj	0.999737	0.0254	-0.01	0.992	0.951173	1.05078	.logisticgdm01a302matbmimatagei.sex12i.PET12i.ethnicityi.paritycodei.intervention	a302	adj	0.990127	0.0295501	-0.33	0.74	0.933871	1.04977
12695	PS(35:0)	0.778207	.logisticgdm01a303	+ve	notadj	1.01228	0.0492715	0.25	0.802	0.920171	1.1136	.logisticgdm01a303matbmimatagei.sex12i.PET12i.ethnicityi.paritycodei.intervention	a303	adj	0.994672	0.0492759	-0.11	0.914	0.902634	1.0961
12737	PA(22:1(11Z)/18:0)	0.778561	.logisticgdm01a304	+ve	notadj	0.978425	0.028489	-0.75	0.454	0.924151	1.03589	.logisticgdm01a304matbmimatagei.sex12i.PET12i.ethnicityi.paritycodei.intervention	a304	adj	0.992187	0.0291277	-0.27	0.789	0.936709	1.05095
12779	PG(48:8)	0.780432	.logisticgdm01a305	+ve	notadj	1.00011	0.0143975	0.01	0.994	0.972286	1.02873	.logisticgdm01a305matbmimatagei.sex12i.PET12i.ethnicityi.paritycodei.intervention	a305	adj	1.01094	0.0145034	0.76	0.448	0.982914	1.03977
12821	PS(41:6)	0.783129	.logisticgdm01a306	+ve	notadj	1.0051	0.0235292	0.22	0.828	0.960024	1.05229	.logisticgdm01a306matbmimatagei.sex12i.PET12i.ethnicityi.paritycodei.intervention	a306	adj	1.00519	0.0241856	0.21	0.83	0.958884	1.05373
12863	PC-O(35:0)_[M+OAC]1-	0.788694	.logisticgdm01a307	+ve	notadj	0.994283	0.0119799	-0.48	0.634	0.971078	1.01804	.logisticgdm01a307matbmimatagei.sex12i.PET12i.ethnicityi.paritycodei.intervention	a307	adj	0.995142	0.0122429	-0.4	0.692	0.971433	1.01943
12905	PC(43:2)_[M+OAC]1- & PS(47:1)	0.790705	.logisticgdm01a308	+ve	notadj	0.933565	0.0667848	-0.96	0.337	0.811432	1.07408	.logisticgdm01a308matbmimatagei.sex12i.PET12i.ethnicityi.paritycodei.intervention	a308	adj	0.952871	0.0712424	-0.65	0.518	0.822987	1.10325
12947	PS(51:8)	0.795112	.logisticgdm01a309	+ve	notadj	0.987738	0.0196773	-0.62	0.536	0.949914	1.02707	.logisticgdm01a309matbmimatagei.sex12i.PET12i.ethnicityi.paritycodei.intervention	a309	adj	0.983274	0.0210998	-0.79	0.432	0.942776	1.02551
12989	SM(44:2)_[M+OAC]1- & TG_oxid(51:1)+Cl-37 & TG_oxid(50:5)+Acetate	0.803667	.logisticgdm01a310	+ve	notadj	0.954298	0.0543587	-0.82	0.412	0.853489	1.06701	.logisticgdm01a310matbmimatagei.sex12i.PET12i.ethnicityi.paritycodei.intervention	a310	adj	0.948245	0.0575539	-0.88	0.381	0.841893	1.06803
13031	PC(31:1)_[M+OAC]1- / PS(35:0)_[M-H]1-	0.812212	.logisticgdm01a311	+ve	notadj	1.01045	0.0494196	0.21	0.832	0.918089	1.11211	.logisticgdm01a311matbmimatagei.sex12i.PET12i.ethnicityi.paritycodei.intervention	a311	adj	0.992382	0.0493449	-0.15	0.878	0.900231	1.09397
13073	PC(42:1)_[M+OAC]1- & PS(46:0)	0.819448	.logisticgdm01a312	+ve	notadj	1.01332	0.0426642	0.31	0.753	0.933061	1.10049	.logisticgdm01a312matbmimatagei.sex12i.PET12i.ethnicityi.paritycodei.intervention	a312	adj	1.04341	0.0459608	0.96	0.335	0.957105	1.13749
13115	PC-P_35:2)_[M+OAC]1- / PS-P_39:1)_[M-H]1-	0.82482	.logisticgdm01a313	+ve	notadj	1.00084	0.0109652	0.08	0.939	0.979575	1.02256	.logisticgdm01a313matbmimatagei.sex12i.PET12i.ethnicityi.paritycodei.intervention	a313	adj	1.0046	0.0113879	0.4	0.686	0.982524	1.02717
13157	TG_oxid(46:3)+Cl-37	0.826333	.logisticgdm01a314	+ve	notadj	0.994757	0.0115685	-0.45	0.651	0.97234	1.01769	.logisticgdm01a314matbmimatagei.sex12i.PET12i.ethnicityi.paritycodei.intervention	a314	adj	0.994795	0.0115965	-0.45	0.654	0.972324	1.01778
13199	Cer(42:2)_[M-H]1-	0.832901	.logisticgdm01a315	+ve	notadj	1.0201	0.0585885	0.35	0.729	0.911493	1.14164	.logisticgdm01a315matbmimatagei.sex12i.PET12i.ethnicityi.paritycodei.intervention	a315	adj	1.02229	0.0609092	0.37	0.711	0.909617	1.14892
13241	PC(48:5) & PS(52:4)	0.833448	.logisticgdm01a316	+ve	notadj	0.985749	0.0334121	-0.42	0.672	0.92239	1.05346	.logisticgdm01a316matbmimatagei.sex12i.PET12i.ethnicityi.paritycodei.intervention	a316	adj	0.992498	0.035853	-0.21	0.835	0.924657	1.06532
13283	PA(P-20:0/18:1(9Z)	0.834463	.logisticgdm01a317	+ve	notadj	1.0033	0.0386089	0.09	0.932	0.930416	1.0819	.logisticgdm01a317matbmimatagei.sex12i.PET12i.ethnicityi.paritycodei.intervention	a317	adj	0.99048	0.0440232	-0.22	0.83	0.907848	1.08063
13325	PC(37:7)_[M+OAC]1- / PS(41:6)_[M-H]1-	0.837216	.logisticgdm01a318	+ve	notadj	1.00372	0.0239253	0.16	0.876	0.957902	1.05172	.logisticgdm01a318matbmimatagei.sex12i.PET12i.ethnicityi.paritycodei.intervention	a318	adj	1.00441	0.0247366	0.18	0.858	0.957076	1.05408
13367	PC-O(38:1)_[M+Cl]1-	0.856837	.logisticgdm01a319	+ve	notadj	0.998711	0.0150677	-0.09	0.932	0.969611	1.02868	.logisticgdm01a319matbmimatagei.sex12i.PET12i.ethnicityi.paritycodei.intervention	a319	adj	0.997927	0.0153534	-0.13	0.893	0.968284	1.02848
13409	LPE(20:0)_[M-H]1-	0.862043	.logisticgdm01a320	+ve	notadj	1.01849	0.0644069	0.29	0.772	0.899765	1.15288	.logisticgdm01a320matbmimatagei.sex12i.PET12i.ethnicityi.paritycodei.intervention	a320	adj	1.03011	0.067189	0.45	0.649	0.906491	1.17058
13451	LPA(36:0)_[M]-	0.86675	.logisticgdm01a321	+ve	notadj	0.997512	0.0830058	-0.03	0.976	0.847398	1.17422	.logisticgdm01a321matbmimatagei.sex12i.PET12i.ethnicityi.paritycodei.intervention	a321	adj	0.957969	0.0824338	-0.5	0.618	0.809292	1.13396
13493	PC(34:1)_[M+OAC]1- & PS(38:0)	0.867379	.logisticgdm01a322	+ve	notadj	1.00648	0.0972906	0.07	0.947	0.832764	1.21642	.logisticgdm01a322matbmimatagei.sex12i.PET12i.ethnicityi.paritycodei.intervention	a322	adj	1.05737	0.107659	0.55	0.584	0.866081	1.2909
13535	PC(28:3)_[M+OAC]1- & PS(32:2)	0.874471	.logisticgdm01a323	+ve	notadj	0.998628	0.0211559	-0.06	0.948	0.958012	1.04096	.logisticgdm01a323matbmimatagei.sex12i.PET12i.ethnicityi.paritycodei.intervention	a323	adj	1.00169	0.0222915	0.08	0.94	0.958936	1.04634
13577	TG(49:0)+Cl-37 & TG(48:4)+Acetate	0.87965	.logisticgdm01a324	+ve	notadj	0.997901	0.0164252	-0.13	0.898	0.966222	1.03062	.logisticgdm01a324matbmimatagei.sex12i.PET12i.ethnicityi.paritycodei.intervention	a324	adj	0.997569	0.0171526	-0.14	0.887	0.964511	1.03176
13619	PI(39:0) & PA(52:10)	0.894387	.logisticgdm01a325	+ve	notadj	0.985731	0.0346832	-0.41	0.683	0.920044	1.05611	.logisticgdm01a325matbmimatagei.sex12i.PET12i.ethnicityi.paritycodei.intervention	a325	adj	0.970398	0.0353924	-0.82	0.41	0.903452	1.04231
13661	PC(35:0)_[M+OAC]1-	0.898081	.logisticgdm01a326	+ve	notadj	0.996623	0.0220555	-0.15	0.879	0.954319	1.0408	.logisticgdm01a326matbmimatagei.sex12i.PET12i.ethnicityi.paritycodei.intervention	a326	adj	1.00336	0.0207746	0.16	0.871	0.963454	1.04491
13703	LPS(26:1) & LPC(22:2)_[M+OAC]1-	0.899706	.logisticgdm01a327	+ve	notadj	0.999814	0.0274292	-0.01	0.995	0.947474	1.05505	.logisticgdm01a327matbmimatagei.sex12i.PET12i.ethnicityi.paritycodei.intervention	a327	adj	1.00105	0.0283724	0.04	0.971	0.946954	1.05823
13745	TG(61:7)+Cl-37 & TG(60:11)+Acetate	0.905414	.logisticgdm01a328	+ve	notadj	1.01409	0.0515506	0.28	0.783	0.917921	1.12033	.logisticgdm01a328matbmimatagei.sex12i.PET12i.ethnicityi.paritycodei.intervention	a328	adj	1.03399	0.0552679	0.63	0.532	0.931146	1.14819
13787	PS(29:2)_[M-H]1-	0.906704	.logisticgdm01a329	+ve	notadj	0.99663	0.0280144	-0.12	0.904	0.943208	1.05308	.logisticgdm01a329matbmimatagei.sex12i.PET12i.ethnicityi.paritycodei.intervention	a329	adj	0.991949	0.0290001	-0.28	0.782	0.936707	1.05045
13829	PG(48:9)	0.907148	.logisticgdm01a330	+ve	notadj	1.04149	0.082066	0.52	0.606	0.892446	1.21542	.logisticgdm01a330matbmimatagei.sex12i.PET12i.ethnicityi.paritycodei.intervention	a330	adj	1.06037	0.0869325	0.71	0.475	0.902965	1.2452
13871	PC(41:2)_[M+OAC]1- & PS(45:1)	0.90951	.logisticgdm01a331	+ve	notadj	1.09625	0.0835509	1.21	0.228	0.944139	1.27287	.logisticgdm01a331matbmimatagei.sex12i.PET12i.ethnicityi.paritycodei.intervention	a331	adj	1.06631	0.0844255	0.81	0.417	0.913039	1.24531
13913	CL(78:5)_[M]2-	0.917515	.logisticgdm01a332	+ve	notadj	1.02613	0.0967679	0.27	0.784	0.852963	1.23445	.logisticgdm01a332matbmimatagei.sex12i.PET12i.ethnicityi.paritycodei.intervention	a332	adj	1.03899	0.10446	0.38	0.704	0.853162	1.26529
13955	SM(36:3)_[M+OAC]1- & TG_oxid(43:2)+Cl-37 & TG_oxid(42:6)+Ac	0.923649	.logisticgdm01a333	+ve	notadj	1.00653	0.055465	0.12	0.906	0.903482	1.12132	.logisticgdm01a333matbmimatagei.sex12i.PET12i.ethnicityi.paritycodei.intervention	a333	adj	0.976732	0.056082	-0.41	0.682	0.872773	1.09307
13997	PA(45:5) & TG_oxid(46:5)+Cl-35	0.923922	.logisticgdm01a334	+ve	notadj	1.03482	0.10328	0.34	0.732	0.85096	1.2584	.logisticgdm01a334matbmimatagei.sex12i.PET12i.ethnicityi.paritycodei.intervention	a334	adj	1.08091	0.113346	0.74	0.458	0.880096	1.32754
14039	PC-P_42:6)_[M+OAC]1-	0.928658	.logisticgdm01a335	+ve	notadj	0.993189	0.0302727	-0.22	0.823	0.935593	1.05433	.logisticgdm01a335matbmimatagei.sex12i.PET12i.ethnicityi.paritycodei.intervention	a335	adj	0.98504	0.0308949	-0.48	0.631	0.926311	1.04749
14081	PI(36:4)	0.930444	.logisticgdm01a336	+ve	notadj	1.00016	0.0327367	0	0.996	0.938011	1.06642	.logisticgdm01a336matbmimatagei.sex12i.PET12i.ethnicityi.paritycodei.intervention	a336	adj	0.997049	0.0334555	-0.09	0.93	0.933587	1.06482
14123	PE(38:3)_[M-H]1-	0.931124	.logisticgdm01a337	+ve	notadj	1.03373	0.0985809	0.35	0.728	0.8575	1.24618	.logisticgdm01a337matbmimatagei.sex12i.PET12i.ethnicityi.paritycodei.intervention	a337	adj	1.05999	0.108531	0.57	0.569	0.867256	1.29555
14165	PC-O(35:4)_[M+OAC]1-	0.940081	.logisticgdm01a338	+ve	notadj	0.963421	0.0394444	-0.91	0.363	0.889132	1.04392	.logisticgdm01a338matbmimatagei.sex12i.PET12i.ethnicityi.paritycodei.intervention	a338	adj	0.972923	0.0410773	-0.65	0.516	0.895654	1.05686
14207	PA(45:4) & TG_oxid(46:4)+Cl-35	0.94027	.logisticgdm01a339	+ve	notadj	0.998778	0.059479	-0.02	0.984	0.888747	1.12243	.logisticgdm01a339matbmimatagei.sex12i.PET12i.ethnicityi.paritycodei.intervention	a339	adj	1.0153	0.0629676	0.24	0.807	0.899086	1.14652
14249	Cer(42:1)_[M-H]1-	0.9447	.logisticgdm01a340	+ve	notadj	1.01608	0.0477761	0.34	0.734	0.926627	1.11417	.logisticgdm01a340matbmimatagei.sex12i.PET12i.ethnicityi.paritycodei.intervention	a340	adj	1.02156	0.0496449	0.44	0.661	0.928752	1.12365
14291	TG(60:1)+Cl-37 & TG(59:5)+Acetate	0.951282	.logisticgdm01a341	+ve	notadj	0.997183	0.0081721	-0.34	0.731	0.981294	1.01333	.logisticgdm01a341matbmimatagei.sex12i.PET12i.ethnicityi.paritycodei.intervention	a341	adj	0.995759	0.0084832	-0.5	0.618	0.97927	1.01253
14333	PC(36:3)_[M+OAC]1- & PS(40:2)	0.966149	.logisticgdm01a342	+ve	notadj	1.02675	0.0939199	0.29	0.773	0.858231	1.22837	.logisticgdm01a342matbmimatagei.sex12i.PET12i.ethnicityi.paritycodei.intervention	a342	adj	1.0503	0.102712	0.5	0.616	0.867102	1.27219
14375	TG_oxid(47:6)+Cl-37	0.9666	.logisticgdm01a343	+ve	notadj	0.999625	0.0257703	-0.01	0.988	0.950371	1.05143	.logisticgdm01a343matbmimatagei.sex12i.PET12i.ethnicityi.paritycodei.intervention	a343	adj	1.00254	0.0270533	0.09	0.925	0.950891	1.05699
14417	TG_oxid(50:6)+Cl-37	0.969055	.logisticgdm01a344	+ve	notadj	0.999182	0.0273177	-0.03	0.976	0.947049	1.05418	.logisticgdm01a344matbmimatagei.sex12i.PET12i.ethnicityi.paritycodei.intervention	a344	adj	1.00522	0.0282914	0.19	0.853	0.951276	1.06223
14459	TG(50:10)+Cl-35	0.972843	.logisticgdm01a345	+ve	notadj	0.984074	0.0269259	-0.59	0.557	0.93269	1.03829	.logisticgdm01a345matbmimatagei.sex12i.PET12i.ethnicityi.paritycodei.intervention	a345	adj	0.985463	0.028955	-0.5	0.618	0.930315	1.04388
14501	PC(36:2)_[M+OAC]1- & PS(40:1)	0.973829	.logisticgdm01a346	+ve	notadj	1.02129	0.0990497	0.22	0.828	0.844487	1.2351	.logisticgdm01a346matbmimatagei.sex12i.PET12i.ethnicityi.paritycodei.intervention	a346	adj	1.00831	0.101645	0.08	0.935	0.827537	1.22858
14543	PE(36:1)_[M-H]1-	0.975703	.logisticgdm01a347	+ve	notadj	1.02694	0.10251	0.27	0.79	0.844456	1.24886	.logisticgdm01a347matbmimatagei.sex12i.PET12i.ethnicityi.paritycodei.intervention	a347	adj	1.07182	0.1118	0.66	0.506	0.873642	1.31495
14585	PC(41:6)_[M+OAC]1-	0.984904	.logisticgdm01a348	+ve	notadj	0.991216	0.0668816	-0.13	0.896	0.868428	1.13136	.logisticgdm01a348matbmimatagei.sex12i.PET12i.ethnicityi.paritycodei.intervention	a348	adj	0.986379	0.0693685	-0.2	0.845	0.859374	1.13216
14627	TG_oxid(65:2)+Cl-37 & TG_oxid(64:6)+Acetate	0.994297	.logisticgdm01a349	+ve	notadj	0.996718	0.0242457	-0.14	0.892	0.950312	1.04539	.logisticgdm01a349matbmimatagei.sex12i.PET12i.ethnicityi.paritycodei.intervention	a349	adj	0.984523	0.0247673	-0.62	0.535	0.937157	1.03428
14669	SM(41:0)_[M+OAC]1- & TG_oxid(48:0)+Cl-37 & TG_oxid(47:4)+Acetate	0.99736	.logisticgdm01a350	+ve	notadj	1.00893	0.101172	0.09	0.929	0.828903	1.22805	.logisticgdm01a350matbmimatagei.sex12i.PET12i.ethnicityi.paritycodei.intervention	a350	adj	0.984835	0.102002	-0.15	0.883	0.803901	1.20649
14711	PC(39:3)_[M+OAC]1- / PS(43:2)_[M-H]1-	0.999204	.logisticgdm01a351	+ve	notadj	1.01291	0.0291794	0.45	0.656	0.9573	1.07174	.logisticgdm01a351matbmimatagei.sex12i.PET12i.ethnicityi.paritycodei.intervention	a351	adj	1.0265	0.0305073	0.88	0.379	0.968414	1.08807
14753	LysoPC(18:1) & PC-P(18:0)	3.46105e-08	.logisticgdm01b1	-ve	notadj	0.819399	0.0317759	-5.14	0	0.759427	0.884107	.logisticgdm01b1matbmimatagei.sex12i.PET12i.ethnicityi.paritycodei.intervention	b1	adj	0.832004	0.0332621	-4.6	0	0.7693	0.899819
14795	LysoPC(16:0)	0.000210756	.logisticgdm01b2	-ve	notadj	0.830061	0.0422456	-3.66	0	0.751257	0.917131	.logisticgdm01b2matbmimatagei.sex12i.PET12i.ethnicityi.paritycodei.intervention	b2	adj	0.835789	0.0439286	-3.41	0.001	0.753977	0.926478
14837	DG-H20(32:0)	0.000412223	.logisticgdm01b3	-ve	notadj	1.19418	0.0560599	3.78	0	1.08921	1.30927	.logisticgdm01b3matbmimatagei.sex12i.PET12i.ethnicityi.paritycodei.intervention	b3	adj	1.18002	0.0574174	3.4	0.001	1.07269	1.2981
14879	TG(50:1)	0.000484654	.logisticgdm01b4	-ve	notadj	1.19042	0.054126	3.83	0	1.08893	1.30138	.logisticgdm01b4matbmimatagei.sex12i.PET12i.ethnicityi.paritycodei.intervention	b4	adj	1.19301	0.0566784	3.71	0	1.08693	1.30943
14921	PC-O(34:1) & PC-P(34:0)	0.000593761	.logisticgdm01b5	-ve	notadj	0.840639	0.0437036	-3.34	0.001	0.759201	0.930812	.logisticgdm01b5matbmimatagei.sex12i.PET12i.ethnicityi.paritycodei.intervention	b5	adj	0.856415	0.0454447	-2.92	0.003	0.77182	0.950281
14963	PC(40:7)	0.00108183	.logisticgdm01b6	-ve	notadj	0.89653	0.031832	-3.08	0.002	0.836262	0.961142	.logisticgdm01b6matbmimatagei.sex12i.PET12i.ethnicityi.paritycodei.intervention	b6	adj	0.892672	0.0326329	-3.11	0.002	0.83095	0.958978
15005	DG-H20(38:6)	0.00127926	.logisticgdm01b7	-ve	notadj	1.09414	0.0345845	2.85	0.004	1.02842	1.16407	.logisticgdm01b7matbmimatagei.sex12i.PET12i.ethnicityi.paritycodei.intervention	b7	adj	1.06854	0.0339481	2.09	0.037	1.00403	1.13719
15047	TG(51:5)	0.0014572	.logisticgdm01b8	-ve	notadj	1.13126	0.0348392	4	0	1.065	1.20165	.logisticgdm01b8matbmimatagei.sex12i.PET12i.ethnicityi.paritycodei.intervention	b8	adj	1.14496	0.0373731	4.15	0	1.074	1.2206
15089	CE(20:5)	0.00146342	.logisticgdm01b9	-ve	notadj	1.04188	0.0127503	3.35	0.001	1.01719	1.06718	.logisticgdm01b9matbmimatagei.sex12i.PET12i.ethnicityi.paritycodei.intervention	b9	adj	1.03485	0.0130784	2.71	0.007	1.00953	1.06081
15131	TG(48:0)	0.00221029	.logisticgdm01b10	-ve	notadj	1.11238	0.0370859	3.19	0.001	1.04202	1.18749	.logisticgdm01b10matbmimatagei.sex12i.PET12i.ethnicityi.paritycodei.intervention	b10	adj	1.10888	0.0378963	3.02	0.002	1.03704	1.1857
15173	DG-H20(38:5)	0.0025621	.logisticgdm01b11	-ve	notadj	1.08498	0.033927	2.61	0.009	1.02048	1.15356	.logisticgdm01b11matbmimatagei.sex12i.PET12i.ethnicityi.paritycodei.intervention	b11	adj	1.08949	0.0349401	2.67	0.008	1.02311	1.16016
15215	TG_oxid(43:2)	0.00521473	.logisticgdm01b12	-ve	notadj	1.02543	0.0152581	1.69	0.092	0.995952	1.05577	.logisticgdm01b12matbmimatagei.sex12i.PET12i.ethnicityi.paritycodei.intervention	b12	adj	1.02408	0.0156203	1.56	0.119	0.993915	1.05516
15257	LysoPC(18:0) & PC-O(18:0)	0.00633764	.logisticgdm01b13	-ve	notadj	0.891844	0.0374978	-2.72	0.006	0.821296	0.968451	.logisticgdm01b13matbmimatagei.sex12i.PET12i.ethnicityi.paritycodei.intervention	b13	adj	0.88558	0.0388291	-2.77	0.006	0.812655	0.96505
15299	TG(46:5)	0.00655385	.logisticgdm01b14	-ve	notadj	0.829254	0.050551	-3.07	0.002	0.735866	0.934494	.logisticgdm01b14matbmimatagei.sex12i.PET12i.ethnicityi.paritycodei.intervention	b14	adj	0.798178	0.0508914	-3.54	0	0.704413	0.904423
15341	PC-P(38:3) & PC-O(38:4)	0.00694667	.logisticgdm01b15	-ve	notadj	0.886121	0.0416378	-2.57	0.01	0.808158	0.971606	.logisticgdm01b15matbmimatagei.sex12i.PET12i.ethnicityi.paritycodei.intervention	b15	adj	0.904967	0.0433777	-2.08	0.037	0.82382	0.994108
15383	TG_oxid(38:2)	0.00740969	.logisticgdm01b16	-ve	notadj	0.927955	0.0314774	-2.2	0.028	0.868267	0.991747	.logisticgdm01b16matbmimatagei.sex12i.PET12i.ethnicityi.paritycodei.intervention	b16	adj	0.919873	0.0329622	-2.33	0.02	0.857485	0.986801
15425	TG(48:4)	0.00741868	.logisticgdm01b17	-ve	notadj	0.846182	0.046343	-3.05	0.002	0.760056	0.942067	.logisticgdm01b17matbmimatagei.sex12i.PET12i.ethnicityi.paritycodei.intervention	b17	adj	0.844691	0.0486956	-2.93	0.003	0.754444	0.945734
15467	TG(48:6)	0.00761088	.logisticgdm01b18	-ve	notadj	0.853071	0.0482854	-2.81	0.005	0.763494	0.953157	.logisticgdm01b18matbmimatagei.sex12i.PET12i.ethnicityi.paritycodei.intervention	b18	adj	0.819105	0.0483243	-3.38	0.001	0.729662	0.919512
15509	SM(32:1)	0.00914834	.logisticgdm01b19	-ve	notadj	0.866296	0.0430283	-2.89	0.004	0.785937	0.954871	.logisticgdm01b19matbmimatagei.sex12i.PET12i.ethnicityi.paritycodei.intervention	b19	adj	0.841769	0.0434272	-3.34	0.001	0.760815	0.931336
15551	TG(48:5)	0.00949167	.logisticgdm01b20	-ve	notadj	0.832695	0.0584058	-2.61	0.009	0.725741	0.95541	.logisticgdm01b20matbmimatagei.sex12i.PET12i.ethnicityi.paritycodei.intervention	b20	adj	0.827068	0.0601438	-2.61	0.009	0.717204	0.953762
15593	PC(35:2)	0.00954643	.logisticgdm01b21	-ve	notadj	0.875864	0.0411652	-2.82	0.005	0.798786	0.96038	.logisticgdm01b21matbmimatagei.sex12i.PET12i.ethnicityi.paritycodei.intervention	b21	adj	0.852141	0.0425379	-3.21	0.001	0.772717	0.939728
15635	PE(39:6) & PC(36:6)	0.0107391	.logisticgdm01b22	-ve	notadj	0.937543	0.0258927	-2.34	0.02	0.888143	0.98969	.logisticgdm01b22matbmimatagei.sex12i.PET12i.ethnicityi.paritycodei.intervention	b22	adj	0.939957	0.0265231	-2.19	0.028	0.889385	0.993406
15677	PC-P(34:1) & PC-O(34:2)	0.0113142	.logisticgdm01b23	-ve	notadj	0.899957	0.0389785	-2.43	0.015	0.826714	0.97969	.logisticgdm01b23matbmimatagei.sex12i.PET12i.ethnicityi.paritycodei.intervention	b23	adj	0.902873	0.0403716	-2.29	0.022	0.827114	0.98557
15719	TG(46:4)	0.0115944	.logisticgdm01b24	-ve	notadj	0.812671	0.0576926	-2.92	0.003	0.70711	0.933991	.logisticgdm01b24matbmimatagei.sex12i.PET12i.ethnicityi.paritycodei.intervention	b24	adj	0.802765	0.0597397	-2.95	0.003	0.693816	0.928823
15761	TG(46:0)	0.0119804	.logisticgdm01b25	-ve	notadj	1.06891	0.026138	2.73	0.006	1.01889	1.12139	.logisticgdm01b25matbmimatagei.sex12i.PET12i.ethnicityi.paritycodei.intervention	b25	adj	1.06522	0.0269957	2.49	0.013	1.0136	1.11946
15803	DG-H20(34:3)	0.0120497	.logisticgdm01b26	-ve	notadj	1.13607	0.0588937	2.46	0.014	1.02632	1.25757	.logisticgdm01b26matbmimatagei.sex12i.PET12i.ethnicityi.paritycodei.intervention	b26	adj	1.20886	0.0671067	3.42	0.001	1.08424	1.34781
15845	LysoPC(17:0)	0.0128131	.logisticgdm01b27	-ve	notadj	0.959093	0.0149657	-2.68	0.007	0.930205	0.988878	.logisticgdm01b27matbmimatagei.sex12i.PET12i.ethnicityi.paritycodei.intervention	b27	adj	0.957667	0.0154252	-2.69	0.007	0.927906	0.988382
15887	TG(53:4)	0.013215	.logisticgdm01b28	-ve	notadj	1.12208	0.041874	3.09	0.002	1.04293	1.20722	.logisticgdm01b28matbmimatagei.sex12i.PET12i.ethnicityi.paritycodei.intervention	b28	adj	1.13648	0.0436189	3.33	0.001	1.05413	1.22527
15929	DG-H20(36:4)	0.0135304	.logisticgdm01b29	-ve	notadj	1.12326	0.0510619	2.56	0.011	1.02751	1.22793	.logisticgdm01b29matbmimatagei.sex12i.PET12i.ethnicityi.paritycodei.intervention	b29	adj	1.13186	0.0553115	2.53	0.011	1.02848	1.24562
15971	TG(50:2)	0.0136521	.logisticgdm01b30	-ve	notadj	1.16275	0.0626063	2.8	0.005	1.04629	1.29216	.logisticgdm01b30matbmimatagei.sex12i.PET12i.ethnicityi.paritycodei.intervention	b30	adj	1.20852	0.0695712	3.29	0.001	1.07957	1.35286
16013	SM(42:4)	0.0158978	.logisticgdm01b31	-ve	notadj	0.886162	0.0443489	-2.41	0.016	0.803366	0.97749	.logisticgdm01b31matbmimatagei.sex12i.PET12i.ethnicityi.paritycodei.intervention	b31	adj	0.857902	0.0447536	-2.94	0.003	0.774522	0.950259
16055	SM(44:5)	0.01743	.logisticgdm01b32	-ve	notadj	0.933064	0.0375451	-1.72	0.085	0.862304	1.00963	.logisticgdm01b32matbmimatagei.sex12i.PET12i.ethnicityi.paritycodei.intervention	b32	adj	0.93272	0.0386636	-1.68	0.093	0.859938	1.01166
16097	PE(34:1) & PC(31:1)	0.0179194	.logisticgdm01b33	-ve	notadj	1.09837	0.048259	2.14	0.033	1.00774	1.19715	.logisticgdm01b33matbmimatagei.sex12i.PET12i.ethnicityi.paritycodei.intervention	b33	adj	1.10083	0.0509633	2.08	0.038	1.00534	1.20539
16139	SM(36:4)	0.0182766	.logisticgdm01b34	-ve	notadj	0.926182	0.0355463	-2	0.046	0.859068	0.998539	.logisticgdm01b34matbmimatagei.sex12i.PET12i.ethnicityi.paritycodei.intervention	b34	adj	0.906551	0.0373592	-2.38	0.017	0.836208	0.982813
16181	TG(51:1)	0.0189918	.logisticgdm01b35	-ve	notadj	1.10537	0.0425664	2.6	0.009	1.02501	1.19203	.logisticgdm01b35matbmimatagei.sex12i.PET12i.ethnicityi.paritycodei.intervention	b35	adj	1.09647	0.0438405	2.3	0.021	1.01382	1.18585
16223	TG(50:9)	0.0217778	.logisticgdm01b36	-ve	notadj	0.945629	0.0275961	-1.92	0.055	0.89306	1.00129	.logisticgdm01b36matbmimatagei.sex12i.PET12i.ethnicityi.paritycodei.intervention	b36	adj	0.946023	0.0286702	-1.83	0.067	0.891466	1.00392
16265	SM(41:2)	0.0225217	.logisticgdm01b37	-ve	notadj	0.872199	0.0471735	-2.53	0.011	0.784472	0.969736	.logisticgdm01b37matbmimatagei.sex12i.PET12i.ethnicityi.paritycodei.intervention	b37	adj	0.843562	0.0473722	-3.03	0.002	0.755641	0.941712
16307	SM(34:1)	0.0231917	.logisticgdm01b38	-ve	notadj	0.870873	0.0488503	-2.46	0.014	0.780204	0.972079	.logisticgdm01b38matbmimatagei.sex12i.PET12i.ethnicityi.paritycodei.intervention	b38	adj	0.838195	0.0491786	-3.01	0.003	0.747143	0.940344
16349	SM(47:0)	0.0232608	.logisticgdm01b39	-ve	notadj	1.06558	0.0323892	2.09	0.037	1.00396	1.13099	.logisticgdm01b39matbmimatagei.sex12i.PET12i.ethnicityi.paritycodei.intervention	b39	adj	1.07095	0.0342759	2.14	0.032	1.00584	1.14028
16391	SM(42:3)	0.0235537	.logisticgdm01b40	-ve	notadj	0.89406	0.0401649	-2.49	0.013	0.818704	0.976351	.logisticgdm01b40matbmimatagei.sex12i.PET12i.ethnicityi.paritycodei.intervention	b40	adj	0.864123	0.0403523	-3.13	0.002	0.788546	0.946945
16433	PC-P(36:3) & PC-O(36:4)	0.0274751	.logisticgdm01b41	-ve	notadj	0.894026	0.0447925	-2.24	0.025	0.810407	0.986273	.logisticgdm01b41matbmimatagei.sex12i.PET12i.ethnicityi.paritycodei.intervention	b41	adj	0.883876	0.0453527	-2.41	0.016	0.79931	0.977389
16475	PC(34:3) & PE(37:3)	0.0277634	.logisticgdm01b42	-ve	notadj	0.867415	0.0532493	-2.32	0.021	0.769083	0.97832	.logisticgdm01b42matbmimatagei.sex12i.PET12i.ethnicityi.paritycodei.intervention	b42	adj	0.894854	0.0572682	-1.74	0.083	0.789364	1.01444
16517	DG-H20(34:2)	0.0277678	.logisticgdm01b43	-ve	notadj	1.153	0.069716	2.35	0.019	1.02415	1.29807	.logisticgdm01b43matbmimatagei.sex12i.PET12i.ethnicityi.paritycodei.intervention	b43	adj	1.15353	0.0728484	2.26	0.024	1.01923	1.30552
16559	TG(53:1)	0.029281	.logisticgdm01b44	-ve	notadj	1.03877	0.0198284	1.99	0.046	1.00063	1.07837	.logisticgdm01b44matbmimatagei.sex12i.PET12i.ethnicityi.paritycodei.intervention	b44	adj	1.03975	0.020405	1.99	0.047	1.00052	1.08052
16601	TG(54:6)	0.0293173	.logisticgdm01b45	-ve	notadj	1.10661	0.0436576	2.57	0.01	1.02427	1.19558	.logisticgdm01b45matbmimatagei.sex12i.PET12i.ethnicityi.paritycodei.intervention	b45	adj	1.0958	0.0460052	2.18	0.029	1.00924	1.18978
16643	TG(55:3)	0.0301791	.logisticgdm01b46	-ve	notadj	1.05023	0.0267864	1.92	0.055	0.999023	1.10407	.logisticgdm01b46matbmimatagei.sex12i.PET12i.ethnicityi.paritycodei.intervention	b46	adj	1.06204	0.0281913	2.27	0.023	1.0082	1.11875
16685	TG(40:4)	0.0321411	.logisticgdm01b47	-ve	notadj	0.878346	0.0487438	-2.34	0.019	0.787823	0.979272	.logisticgdm01b47matbmimatagei.sex12i.PET12i.ethnicityi.paritycodei.intervention	b47	adj	0.847173	0.0491483	-2.86	0.004	0.756119	0.949192
16727	TG(55:4)	0.0357653	.logisticgdm01b48	-ve	notadj	1.03877	0.0204872	1.93	0.054	0.999386	1.07971	.logisticgdm01b48matbmimatagei.sex12i.PET12i.ethnicityi.paritycodei.intervention	b48	adj	1.04506	0.0214026	2.15	0.031	1.00395	1.08786
16769	TG(50:5)	0.0393287	.logisticgdm01b49	-ve	notadj	1.06677	0.0290923	2.37	0.018	1.01125	1.12534	.logisticgdm01b49matbmimatagei.sex12i.PET12i.ethnicityi.paritycodei.intervention	b49	adj	1.07072	0.0303327	2.41	0.016	1.01288	1.13185
16811	LysoPC(18:3)	0.0457528	.logisticgdm01b50	-ve	notadj	0.945508	0.0275071	-1.93	0.054	0.893104	1.00099	.logisticgdm01b50matbmimatagei.sex12i.PET12i.ethnicityi.paritycodei.intervention	b50	adj	0.952653	0.0282817	-1.63	0.102	0.898804	1.00973
16853	SM(42:1)	0.0471073	.logisticgdm01b51	-ve	notadj	0.875816	0.0548702	-2.12	0.034	0.774613	0.990241	.logisticgdm01b51matbmimatagei.sex12i.PET12i.ethnicityi.paritycodei.intervention	b51	adj	0.846181	0.0569645	-2.48	0.013	0.741584	0.96553
16895	DG-H20(33:2)	0.0487555	.logisticgdm01b52	-ve	notadj	0.934946	0.0253373	-2.48	0.013	0.886582	0.985949	.logisticgdm01b52matbmimatagei.sex12i.PET12i.ethnicityi.paritycodei.intervention	b52	adj	0.945754	0.0264347	-2	0.046	0.895337	0.999011
16937	SM(46:0)	0.0516977	.logisticgdm01b53	-ve	notadj	1.09186	0.0502097	1.91	0.056	0.997757	1.19484	.logisticgdm01b53matbmimatagei.sex12i.PET12i.ethnicityi.paritycodei.intervention	b53	adj	1.0908	0.0535358	1.77	0.077	0.990759	1.20094
16979	TG(52:4)	0.0519217	.logisticgdm01b54	-ve	notadj	1.09321	0.0506916	1.92	0.055	0.998238	1.19722	.logisticgdm01b54matbmimatagei.sex12i.PET12i.ethnicityi.paritycodei.intervention	b54	adj	1.09164	0.0540502	1.77	0.077	0.990685	1.20289
17021	CE(18:3)	0.0538122	.logisticgdm01b55	-ve	notadj	1.08906	0.0329258	2.82	0.005	1.0264	1.15555	.logisticgdm01b55matbmimatagei.sex12i.PET12i.ethnicityi.paritycodei.intervention	b55	adj	1.11047	0.0360238	3.23	0.001	1.04206	1.18336
17063	SM(44:6)	0.0540369	.logisticgdm01b56	-ve	notadj	0.956851	0.0327404	-1.29	0.197	0.894786	1.02322	.logisticgdm01b56matbmimatagei.sex12i.PET12i.ethnicityi.paritycodei.intervention	b56	adj	0.952318	0.0338727	-1.37	0.17	0.88819	1.02108
17105	TG(56:8)	0.0586139	.logisticgdm01b57	-ve	notadj	1.0478	0.0241254	2.03	0.043	1.00157	1.09617	.logisticgdm01b57matbmimatagei.sex12i.PET12i.ethnicityi.paritycodei.intervention	b57	adj	1.03014	0.0254697	1.2	0.23	0.981412	1.08129
17147	TG(56:7)	0.0605074	.logisticgdm01b58	-ve	notadj	1.08312	0.0406818	2.13	0.034	1.00625	1.16587	.logisticgdm01b58matbmimatagei.sex12i.PET12i.ethnicityi.paritycodei.intervention	b58	adj	1.06251	0.0422034	1.53	0.127	0.982928	1.14853
17189	TG(52:6)	0.0639935	.logisticgdm01b59	-ve	notadj	1.07986	0.0337994	2.45	0.014	1.0156	1.14818	.logisticgdm01b59matbmimatagei.sex12i.PET12i.ethnicityi.paritycodei.intervention	b59	adj	1.0818	0.0353059	2.41	0.016	1.01477	1.15326
17231	DG(34:1)	0.0646445	.logisticgdm01b60	-ve	notadj	1.07421	0.0361481	2.13	0.033	1.00565	1.14745	.logisticgdm01b60matbmimatagei.sex12i.PET12i.ethnicityi.paritycodei.intervention	b60	adj	1.08573	0.0384081	2.33	0.02	1.013	1.16368
17273	LysoPC(15:0)	0.0662681	.logisticgdm01b61	-ve	notadj	0.977577	0.0148029	-1.5	0.134	0.94899	1.00703	.logisticgdm01b61matbmimatagei.sex12i.PET12i.ethnicityi.paritycodei.intervention	b61	adj	0.976959	0.0149462	-1.52	0.128	0.948099	1.0067
17315	DG-H20(34:1)	0.0677503	.logisticgdm01b62	-ve	notadj	1.12918	0.0657038	2.09	0.037	1.00747	1.26559	.logisticgdm01b62matbmimatagei.sex12i.PET12i.ethnicityi.paritycodei.intervention	b62	adj	1.16253	0.0714718	2.45	0.014	1.03056	1.3114
17357	TG(48:1)	0.0693427	.logisticgdm01b63	-ve	notadj	1.07577	0.0415571	1.89	0.059	0.997329	1.16038	.logisticgdm01b63matbmimatagei.sex12i.PET12i.ethnicityi.paritycodei.intervention	b63	adj	1.08971	0.0440894	2.12	0.034	1.00663	1.17964
17399	SM(40:2)	0.0697491	.logisticgdm01b64	-ve	notadj	0.894344	0.0484598	-2.06	0.039	0.804234	0.99455	.logisticgdm01b64matbmimatagei.sex12i.PET12i.ethnicityi.paritycodei.intervention	b64	adj	0.863727	0.0487122	-2.6	0.009	0.77334	0.964678
17441	SM(38:1)	0.0748249	.logisticgdm01b65	-ve	notadj	0.90043	0.0485819	-1.94	0.052	0.810073	1.00087	.logisticgdm01b65matbmimatagei.sex12i.PET12i.ethnicityi.paritycodei.intervention	b65	adj	0.895705	0.0495028	-1.99	0.046	0.803752	0.998179
17483	PC(37:4)	0.0835508	.logisticgdm01b66	-ve	notadj	0.948545	0.031611	-1.59	0.113	0.888569	1.01257	.logisticgdm01b66matbmimatagei.sex12i.PET12i.ethnicityi.paritycodei.intervention	b66	adj	0.940431	0.0325735	-1.77	0.076	0.878707	1.00649
17525	PE(43:6) & PC(40:6)	0.0844605	.logisticgdm01b67	-ve	notadj	1.08904	0.0521338	1.78	0.075	0.991505	1.19617	.logisticgdm01b67matbmimatagei.sex12i.PET12i.ethnicityi.paritycodei.intervention	b67	adj	1.03319	0.0552572	0.61	0.542	0.930369	1.14737
17567	SM(34:2)	0.0849717	.logisticgdm01b68	-ve	notadj	0.901878	0.0473479	-1.97	0.049	0.813692	0.99962	.logisticgdm01b68matbmimatagei.sex12i.PET12i.ethnicityi.paritycodei.intervention	b68	adj	0.847918	0.0469652	-2.98	0.003	0.760688	0.94515
17609	PC(42:11)	0.0857487	.logisticgdm01b69	-ve	notadj	0.967133	0.0168499	-1.92	0.055	0.934666	1.00073	.logisticgdm01b69matbmimatagei.sex12i.PET12i.ethnicityi.paritycodei.intervention	b69	adj	0.969698	0.0175532	-1.7	0.089	0.935897	1.00472
17651	PC-O(36:5) & PC-P(36:4)	0.0883286	.logisticgdm01b70	-ve	notadj	0.944765	0.0278268	-1.93	0.054	0.89177	1.00091	.logisticgdm01b70matbmimatagei.sex12i.PET12i.ethnicityi.paritycodei.intervention	b70	adj	0.925675	0.0293929	-2.43	0.015	0.869822	0.985115
17693	TG(53:5)	0.0895476	.logisticgdm01b71	-ve	notadj	1.04721	0.025198	1.92	0.055	0.998969	1.09778	.logisticgdm01b71matbmimatagei.sex12i.PET12i.ethnicityi.paritycodei.intervention	b71	adj	1.03981	0.0258564	1.57	0.116	0.990349	1.09174
17735	SM(33:1)	0.0904853	.logisticgdm01b72	-ve	notadj	0.930504	0.0399524	-1.68	0.093	0.855403	1.0122	.logisticgdm01b72matbmimatagei.sex12i.PET12i.ethnicityi.paritycodei.intervention	b72	adj	0.910756	0.0406584	-2.09	0.036	0.834454	0.994035
17777	PE(38:1) & PC(35:1)	0.0911683	.logisticgdm01b73	-ve	notadj	0.945148	0.0433162	-1.23	0.218	0.863951	1.03398	.logisticgdm01b73matbmimatagei.sex12i.PET12i.ethnicityi.paritycodei.intervention	b73	adj	0.954094	0.0461565	-0.97	0.331	0.867785	1.04899
17819	TG(40:5)	0.0971777	.logisticgdm01b74	-ve	notadj	0.926668	0.0458053	-1.54	0.123	0.841103	1.02094	.logisticgdm01b74matbmimatagei.sex12i.PET12i.ethnicityi.paritycodei.intervention	b74	adj	0.884873	0.0456211	-2.37	0.018	0.799827	0.978963
17861	Cer(36:5)	0.0975803	.logisticgdm01b75	-ve	notadj	0.979963	0.0131948	-1.5	0.133	0.95444	1.00617	.logisticgdm01b75matbmimatagei.sex12i.PET12i.ethnicityi.paritycodei.intervention	b75	adj	0.979141	0.0133961	-1.54	0.123	0.953234	1.00575
17903	TG(42:0)	0.100254	.logisticgdm01b76	-ve	notadj	1.01635	0.0138904	1.19	0.236	0.989482	1.04394	.logisticgdm01b76matbmimatagei.sex12i.PET12i.ethnicityi.paritycodei.intervention	b76	adj	1.01431	0.0143766	1	0.316	0.986521	1.04288
17945	TG(47:5)	0.102931	.logisticgdm01b77	-ve	notadj	0.92892	0.0452599	-1.51	0.13	0.844316	1.022	.logisticgdm01b77matbmimatagei.sex12i.PET12i.ethnicityi.paritycodei.intervention	b77	adj	0.910877	0.0460517	-1.85	0.065	0.824945	1.00576
17987	TG(53:3)	0.10937	.logisticgdm01b78	-ve	notadj	1.09327	0.0554211	1.76	0.079	0.989866	1.20747	.logisticgdm01b78matbmimatagei.sex12i.PET12i.ethnicityi.paritycodei.intervention	b78	adj	1.12577	0.0599084	2.23	0.026	1.01427	1.24954
18029	PE(43:4)	0.111298	.logisticgdm01b79	-ve	notadj	0.958835	0.0231138	-1.74	0.081	0.914586	1.00523	.logisticgdm01b79matbmimatagei.sex12i.PET12i.ethnicityi.paritycodei.intervention	b79	adj	0.9582	0.023786	-1.72	0.085	0.912697	1.00597
18071	TG(50:3)	0.112929	.logisticgdm01b80	-ve	notadj	1.105	0.062609	1.76	0.078	0.988854	1.23478	.logisticgdm01b80matbmimatagei.sex12i.PET12i.ethnicityi.paritycodei.intervention	b80	adj	1.15245	0.069363	2.36	0.018	1.02421	1.29674
18113	SM(44:0)	0.11443	.logisticgdm01b81	-ve	notadj	1.08893	0.0480248	1.93	0.053	0.998762	1.18725	.logisticgdm01b81matbmimatagei.sex12i.PET12i.ethnicityi.paritycodei.intervention	b81	adj	1.13748	0.052945	2.77	0.006	1.03831	1.24613
18155	TG(54:5)	0.114993	.logisticgdm01b82	-ve	notadj	1.07366	0.0480279	1.59	0.112	0.983539	1.17205	.logisticgdm01b82matbmimatagei.sex12i.PET12i.ethnicityi.paritycodei.intervention	b82	adj	1.07787	0.0507094	1.59	0.111	0.982923	1.18198
18197	PC-P(38:7) & PC-O(38:8)	0.122519	.logisticgdm01b83	-ve	notadj	0.979576	0.0117377	-1.72	0.085	0.956839	1.00285	.logisticgdm01b83matbmimatagei.sex12i.PET12i.ethnicityi.paritycodei.intervention	b83	adj	0.976588	0.0124727	-1.85	0.064	0.952446	1.00134
18239	SM(48:1)	0.124693	.logisticgdm01b84	-ve	notadj	1.07454	0.0488293	1.58	0.114	0.982974	1.17464	.logisticgdm01b84matbmimatagei.sex12i.PET12i.ethnicityi.paritycodei.intervention	b84	adj	1.07864	0.0516109	1.58	0.114	0.982087	1.1847
18281	TG(44:0)	0.132817	.logisticgdm01b85	-ve	notadj	1.02999	0.0194047	1.57	0.117	0.992655	1.06874	.logisticgdm01b85matbmimatagei.sex12i.PET12i.ethnicityi.paritycodei.intervention	b85	adj	1.0238	0.0199604	1.21	0.228	0.985417	1.06368
18323	PC(36:1) & PE(39:1)	0.137044	.logisticgdm01b86	-ve	notadj	0.939754	0.0446014	-1.31	0.19	0.85628	1.03137	.logisticgdm01b86matbmimatagei.sex12i.PET12i.ethnicityi.paritycodei.intervention	b86	adj	0.948763	0.0467292	-1.07	0.286	0.861458	1.04492
18365	TG(51:4)	0.14078	.logisticgdm01b87	-ve	notadj	1.03249	0.0296537	1.11	0.266	0.975973	1.09228	.logisticgdm01b87matbmimatagei.sex12i.PET12i.ethnicityi.paritycodei.intervention	b87	adj	1.02742	0.030739	0.9	0.366	0.968901	1.08946
18407	SM(47:1)	0.159051	.logisticgdm01b88	-ve	notadj	1.02757	0.0197125	1.42	0.156	0.989653	1.06694	.logisticgdm01b88matbmimatagei.sex12i.PET12i.ethnicityi.paritycodei.intervention	b88	adj	1.02963	0.0207571	1.45	0.148	0.989735	1.07112
18449	TG(50:8)	0.159317	.logisticgdm01b89	-ve	notadj	0.96052	0.0308312	-1.25	0.21	0.901954	1.02289	.logisticgdm01b89matbmimatagei.sex12i.PET12i.ethnicityi.paritycodei.intervention	b89	adj	0.966928	0.0319507	-1.02	0.309	0.90629	1.03162
18491	TG(54:1)	0.168146	.logisticgdm01b90	-ve	notadj	1.04167	0.0275354	1.54	0.122	0.989077	1.09706	.logisticgdm01b90matbmimatagei.sex12i.PET12i.ethnicityi.paritycodei.intervention	b90	adj	1.06024	0.0289066	2.15	0.032	1.00507	1.11844
18533	SM(42:2)	0.173581	.logisticgdm01b91	-ve	notadj	0.925602	0.0507753	-1.41	0.159	0.831247	1.03067	.logisticgdm01b91matbmimatagei.sex12i.PET12i.ethnicityi.paritycodei.intervention	b91	adj	0.911624	0.0514292	-1.64	0.101	0.816197	1.01821
18575	DG-H20(35:2)	0.176858	.logisticgdm01b92	-ve	notadj	1.04186	0.027739	1.54	0.123	0.988889	1.09767	.logisticgdm01b92matbmimatagei.sex12i.PET12i.ethnicityi.paritycodei.intervention	b92	adj	1.04871	0.0315817	1.58	0.114	0.9886	1.11247
18617	TG(52:3)	0.17705	.logisticgdm01b93	-ve	notadj	1.08053	0.0557657	1.5	0.133	0.976581	1.19555	.logisticgdm01b93matbmimatagei.sex12i.PET12i.ethnicityi.paritycodei.intervention	b93	adj	1.09519	0.0593026	1.68	0.093	0.984919	1.21782
18659	CE(18:1)	0.182295	.logisticgdm01b94	-ve	notadj	0.939288	0.0411898	-1.43	0.153	0.86193	1.02359	.logisticgdm01b94matbmimatagei.sex12i.PET12i.ethnicityi.paritycodei.intervention	b94	adj	0.951494	0.0435726	-1.09	0.278	0.869814	1.04085
18701	PE(39:2) & PC(36:2)	0.186895	.logisticgdm01b95	-ve	notadj	0.931754	0.0494147	-1.33	0.183	0.839766	1.03382	.logisticgdm01b95matbmimatagei.sex12i.PET12i.ethnicityi.paritycodei.intervention	b95	adj	0.910341	0.050299	-1.7	0.089	0.816907	1.01446
18743	PC(33:2) & PE(36:2)	0.188211	.logisticgdm01b96	-ve	notadj	0.936729	0.0424743	-1.44	0.149	0.857073	1.02379	.logisticgdm01b96matbmimatagei.sex12i.PET12i.ethnicityi.paritycodei.intervention	b96	adj	0.914819	0.0439881	-1.85	0.064	0.832542	1.00523
18785	LysoPC(20:5)	0.190129	.logisticgdm01b97	-ve	notadj	0.977894	0.0113508	-1.93	0.054	0.955898	1.0004	.logisticgdm01b97matbmimatagei.sex12i.PET12i.ethnicityi.paritycodei.intervention	b97	adj	0.976869	0.0117602	-1.94	0.052	0.954089	1.00019
18827	TG(54:7)	0.191313	.logisticgdm01b98	-ve	notadj	1.04978	0.0321122	1.59	0.112	0.988695	1.11465	.logisticgdm01b98matbmimatagei.sex12i.PET12i.ethnicityi.paritycodei.intervention	b98	adj	1.03965	0.0333957	1.21	0.226	0.976218	1.10721
18869	TG(55:2)	0.193729	.logisticgdm01b99	-ve	notadj	1.03642	0.0248003	1.49	0.135	0.988935	1.08619	.logisticgdm01b99matbmimatagei.sex12i.PET12i.ethnicityi.paritycodei.intervention	b99	adj	1.04256	0.0258428	1.68	0.093	0.99312	1.09446
18910	TG(47:4)	0.196517	.logisticgdm01b100	-ve	notadj	0.924627	0.0516753	-1.4	0.161	0.828696	1.03166	.logisticgdm01b100matbmimatagei.sex12i.PET12i.ethnicityi.paritycodei.intervention	b100	adj	0.90849	0.0528413	-1.65	0.099	0.810608	1.01819
18952	PC-O(44:5) & PC-P(44:4)	0.202653	.logisticgdm01b101	-ve	notadj	0.976157	0.0222789	-1.06	0.29	0.933453	1.02081	.logisticgdm01b101matbmimatagei.sex12i.PET12i.ethnicityi.paritycodei.intervention	b101	adj	0.987529	0.0226543	-0.55	0.584	0.944111	1.03294
18994	CE(18:2)	0.205142	.logisticgdm01b102	-ve	notadj	0.939424	0.0405706	-1.45	0.148	0.863179	1.0224	.logisticgdm01b102matbmimatagei.sex12i.PET12i.ethnicityi.paritycodei.intervention	b102	adj	0.928705	0.0420674	-1.63	0.102	0.849809	1.01493
19036	SM(36:2)	0.208952	.logisticgdm01b103	-ve	notadj	0.941048	0.0467836	-1.22	0.222	0.85368	1.03736	.logisticgdm01b103matbmimatagei.sex12i.PET12i.ethnicityi.paritycodei.intervention	b103	adj	0.901762	0.0473196	-1.97	0.049	0.813628	0.999444
19078	CE(16:1)	0.213165	.logisticgdm01b104	-ve	notadj	1.05174	0.0329417	1.61	0.107	0.989122	1.11833	.logisticgdm01b104matbmimatagei.sex12i.PET12i.ethnicityi.paritycodei.intervention	b104	adj	1.07879	0.0363539	2.25	0.024	1.00984	1.15244
19120	PC(38:7)	0.215695	.logisticgdm01b105	-ve	notadj	0.968163	0.0295182	-1.06	0.289	0.912003	1.02778	.logisticgdm01b105matbmimatagei.sex12i.PET12i.ethnicityi.paritycodei.intervention	b105	adj	0.948326	0.0307406	-1.64	0.102	0.889949	1.01053
19162	TG(56:2)	0.220109	.logisticgdm01b106	-ve	notadj	1.07442	0.0414604	1.86	0.063	0.996161	1.15884	.logisticgdm01b106matbmimatagei.sex12i.PET12i.ethnicityi.paritycodei.intervention	b106	adj	1.10577	0.0443761	2.51	0.012	1.02213	1.19626
19204	PC-P(40:3)	0.222554	.logisticgdm01b107	-ve	notadj	0.892655	0.0271067	-3.74	0	0.841077	0.947396	.logisticgdm01b107matbmimatagei.sex12i.PET12i.ethnicityi.paritycodei.intervention	b107	adj	0.908637	0.0281274	-3.1	0.002	0.855148	0.965473
19246	TG(42:4)	0.223088	.logisticgdm01b108	-ve	notadj	0.934941	0.0479474	-1.31	0.19	0.845535	1.0338	.logisticgdm01b108matbmimatagei.sex12i.PET12i.ethnicityi.paritycodei.intervention	b108	adj	0.917277	0.0485807	-1.63	0.103	0.826836	1.01761
19288	PC(34:1) & PE(37:1)	0.223659	.logisticgdm01b109	-ve	notadj	0.936504	0.0559239	-1.1	0.272	0.833067	1.05279	.logisticgdm01b109matbmimatagei.sex12i.PET12i.ethnicityi.paritycodei.intervention	b109	adj	0.953703	0.0593642	-0.76	0.446	0.844169	1.07745
19330	DG-H20(36:3)	0.226318	.logisticgdm01b110	-ve	notadj	1.06188	0.0559766	1.14	0.255	0.957648	1.17746	.logisticgdm01b110matbmimatagei.sex12i.PET12i.ethnicityi.paritycodei.intervention	b110	adj	1.06772	0.0591547	1.18	0.237	0.957849	1.19019
19372	TG(38:4)	0.229361	.logisticgdm01b111	-ve	notadj	0.953719	0.0386929	-1.17	0.243	0.880819	1.03265	.logisticgdm01b111matbmimatagei.sex12i.PET12i.ethnicityi.paritycodei.intervention	b111	adj	0.943288	0.0405849	-1.36	0.175	0.867005	1.02628
19414	TG(54:3)	0.23588	.logisticgdm01b112	-ve	notadj	0.949414	0.0436555	-1.13	0.259	0.867593	1.03895	.logisticgdm01b112matbmimatagei.sex12i.PET12i.ethnicityi.paritycodei.intervention	b112	adj	0.980631	0.0471147	-0.41	0.684	0.892502	1.07746
19456	PC(38:1) & PE(41:1)	0.236914	.logisticgdm01b113	-ve	notadj	1.00946	0.0071177	1.33	0.182	0.995602	1.0235	.logisticgdm01b113matbmimatagei.sex12i.PET12i.ethnicityi.paritycodei.intervention	b113	adj	1.01127	0.0074442	1.52	0.128	0.996785	1.02597
19498	SM(38:4)	0.238144	.logisticgdm01b114	-ve	notadj	0.968658	0.023011	-1.34	0.18	0.924591	1.01483	.logisticgdm01b114matbmimatagei.sex12i.PET12i.ethnicityi.paritycodei.intervention	b114	adj	0.968967	0.0241775	-1.26	0.206	0.92272	1.01753
19540	SM(39:1)	0.245431	.logisticgdm01b115	-ve	notadj	0.95374	0.0433578	-1.04	0.297	0.872437	1.04262	.logisticgdm01b115matbmimatagei.sex12i.PET12i.ethnicityi.paritycodei.intervention	b115	adj	0.944707	0.0446209	-1.2	0.228	0.861178	1.03634
19582	PC-P(36:1) & PC-O(36:2)	0.246604	.logisticgdm01b116	-ve	notadj	0.96987	0.0243668	-1.22	0.223	0.923269	1.01882	.logisticgdm01b116matbmimatagei.sex12i.PET12i.ethnicityi.paritycodei.intervention	b116	adj	0.982738	0.0253575	-0.67	0.5	0.934274	1.03372
19624	SM(45:0)	0.256245	.logisticgdm01b117	-ve	notadj	1.0317	0.0280759	1.15	0.252	0.97811	1.08822	.logisticgdm01b117matbmimatagei.sex12i.PET12i.ethnicityi.paritycodei.intervention	b117	adj	1.02956	0.0291514	1.03	0.304	0.97398	1.08831
19666	TG(53:2)	0.265609	.logisticgdm01b118	-ve	notadj	1.07893	0.0534409	1.53	0.125	0.979108	1.18892	.logisticgdm01b118matbmimatagei.sex12i.PET12i.ethnicityi.paritycodei.intervention	b118	adj	1.12819	0.0597082	2.28	0.023	1.01703	1.25151
19708	SM(32:2)	0.270357	.logisticgdm01b119	-ve	notadj	0.974651	0.0270451	-0.93	0.355	0.923059	1.02913	.logisticgdm01b119matbmimatagei.sex12i.PET12i.ethnicityi.paritycodei.intervention	b119	adj	0.961539	0.0278906	-1.35	0.176	0.908399	1.01779
19750	DG-H20(36:1)	0.274241	.logisticgdm01b120	-ve	notadj	1.05125	0.0392203	1.34	0.18	0.97712	1.131	.logisticgdm01b120matbmimatagei.sex12i.PET12i.ethnicityi.paritycodei.intervention	b120	adj	1.05439	0.0407579	1.37	0.171	0.977453	1.13737
19792	TG(58:7)	0.27431	.logisticgdm01b121	-ve	notadj	1.04083	0.0290005	1.44	0.151	0.985512	1.09925	.logisticgdm01b121matbmimatagei.sex12i.PET12i.ethnicityi.paritycodei.intervention	b121	adj	1.03865	0.0303994	1.3	0.195	0.98074	1.09997
19834	Cholesterol-loss OH	0.279077	.logisticgdm01b122	-ve	notadj	0.942374	0.0446021	-1.25	0.21	0.858887	1.03398	.logisticgdm01b122matbmimatagei.sex12i.PET12i.ethnicityi.paritycodei.intervention	b122	adj	0.929338	0.0461007	-1.48	0.14	0.843235	1.02423
19876	TG(56:4)	0.282831	.logisticgdm01b123	-ve	notadj	1.06128	0.0446199	1.41	0.157	0.977336	1.15244	.logisticgdm01b123matbmimatagei.sex12i.PET12i.ethnicityi.paritycodei.intervention	b123	adj	1.08231	0.0475622	1.8	0.072	0.992991	1.17966
19918	DG(34:2)	0.293032	.logisticgdm01b124	-ve	notadj	1.03769	0.039912	0.96	0.336	0.962338	1.11894	.logisticgdm01b124matbmimatagei.sex12i.PET12i.ethnicityi.paritycodei.intervention	b124	adj	1.04358	0.0419033	1.06	0.288	0.964603	1.12903
19960	TG(44:5)	0.30458	.logisticgdm01b125	-ve	notadj	0.973529	0.0351591	-0.74	0.458	0.907001	1.04494	.logisticgdm01b125matbmimatagei.sex12i.PET12i.ethnicityi.paritycodei.intervention	b125	adj	0.974396	0.0371806	-0.68	0.497	0.904182	1.05006
20002	TG(52:2)	0.309872	.logisticgdm01b126	-ve	notadj	1.06372	0.0508834	1.29	0.197	0.968519	1.16827	.logisticgdm01b126matbmimatagei.sex12i.PET12i.ethnicityi.paritycodei.intervention	b126	adj	1.10654	0.0568826	1.97	0.049	1.00049	1.22384
20044	DG-H20(46:7)	0.317652	.logisticgdm01b127	-ve	notadj	0.972295	0.0259671	-1.05	0.293	0.92271	1.02455	.logisticgdm01b127matbmimatagei.sex12i.PET12i.ethnicityi.paritycodei.intervention	b127	adj	0.967584	0.027056	-1.18	0.239	0.915982	1.02209
20086	TG(56:1)	0.321811	.logisticgdm01b128	-ve	notadj	1.00772	0.0081305	0.95	0.34	0.991913	1.02379	.logisticgdm01b128matbmimatagei.sex12i.PET12i.ethnicityi.paritycodei.intervention	b128	adj	1.00959	0.008133	1.18	0.236	0.993772	1.02565
20128	DG(38:0)	0.325043	.logisticgdm01b129	-ve	notadj	0.969249	0.0353738	-0.86	0.392	0.902339	1.04112	.logisticgdm01b129matbmimatagei.sex12i.PET12i.ethnicityi.paritycodei.intervention	b129	adj	0.987518	0.0373549	-0.33	0.74	0.916952	1.06351
20170	SM(36:1)	0.327721	.logisticgdm01b130	-ve	notadj	0.948509	0.0491701	-1.02	0.308	0.856872	1.04995	.logisticgdm01b130matbmimatagei.sex12i.PET12i.ethnicityi.paritycodei.intervention	b130	adj	0.927391	0.0498326	-1.4	0.161	0.834688	1.03039
20212	PC(36:3) & PE(39:3)	0.330027	.logisticgdm01b131	-ve	notadj	0.957005	0.0508946	-0.83	0.409	0.862277	1.06214	.logisticgdm01b131matbmimatagei.sex12i.PET12i.ethnicityi.paritycodei.intervention	b131	adj	0.95521	0.0532437	-0.82	0.411	0.856353	1.06548
20254	PC-O(32:0)	0.332464	.logisticgdm01b132	-ve	notadj	0.959362	0.0377578	-1.05	0.292	0.88814	1.03629	.logisticgdm01b132matbmimatagei.sex12i.PET12i.ethnicityi.paritycodei.intervention	b132	adj	0.966939	0.0403491	-0.81	0.42	0.891004	1.04935
20296	PC(31:0) & PE(34:0)	0.339545	.logisticgdm01b133	-ve	notadj	0.992347	0.0124175	-0.61	0.539	0.968305	1.01699	.logisticgdm01b133matbmimatagei.sex12i.PET12i.ethnicityi.paritycodei.intervention	b133	adj	0.992873	0.0127848	-0.56	0.579	0.968129	1.01825
20338	DG-H20(30:0)	0.340544	.logisticgdm01b134	-ve	notadj	1.03705	0.0377879	1	0.318	0.965567	1.11382	.logisticgdm01b134matbmimatagei.sex12i.PET12i.ethnicityi.paritycodei.intervention	b134	adj	1.0345	0.0390728	0.9	0.369	0.960688	1.11399
20380	PC(33:0) & PE(36:0)	0.342573	.logisticgdm01b135	-ve	notadj	1.01187	0.0168041	0.71	0.477	0.979462	1.04534	.logisticgdm01b135matbmimatagei.sex12i.PET12i.ethnicityi.paritycodei.intervention	b135	adj	1.00812	0.0174582	0.47	0.64	0.97448	1.04293
20422	DG(44:11)	0.342852	.logisticgdm01b136	-ve	notadj	1.05072	0.0446368	1.16	0.244	0.966777	1.14195	.logisticgdm01b136matbmimatagei.sex12i.PET12i.ethnicityi.paritycodei.intervention	b136	adj	1.08198	0.0504141	1.69	0.091	0.987553	1.18545
20464	PC(32:1) & PE(35:1)	0.34598	.logisticgdm01b137	-ve	notadj	1.05042	0.0446214	1.16	0.247	0.966502	1.14162	.logisticgdm01b137matbmimatagei.sex12i.PET12i.ethnicityi.paritycodei.intervention	b137	adj	1.08163	0.0503955	1.68	0.092	0.987237	1.18506
20506	PC(38:5) & PE(41:5)	0.366639	.logisticgdm01b138	-ve	notadj	0.94748	0.0559589	-0.91	0.361	0.843912	1.06376	.logisticgdm01b138matbmimatagei.sex12i.PET12i.ethnicityi.paritycodei.intervention	b138	adj	0.903653	0.0558588	-1.64	0.101	0.800544	1.02004
20548	PC(34:2)	0.377231	.logisticgdm01b139	-ve	notadj	0.948202	0.055327	-0.91	0.362	0.845734	1.06309	.logisticgdm01b139matbmimatagei.sex12i.PET12i.ethnicityi.paritycodei.intervention	b139	adj	0.910411	0.0554607	-1.54	0.123	0.807948	1.02587
20590	DG-H20(32:2)	0.383924	.logisticgdm01b140	-ve	notadj	1.04279	0.0351021	1.24	0.213	0.976209	1.11391	.logisticgdm01b140matbmimatagei.sex12i.PET12i.ethnicityi.paritycodei.intervention	b140	adj	1.03872	0.0357604	1.1	0.27	0.97094	1.11122
20632	TG(52:5)	0.396637	.logisticgdm01b141	-ve	notadj	1.04302	0.0474914	0.92	0.355	0.953968	1.14038	.logisticgdm01b141matbmimatagei.sex12i.PET12i.ethnicityi.paritycodei.intervention	b141	adj	1.05825	0.0504173	1.19	0.235	0.963903	1.16182
20674	TG(50:4)	0.400703	.logisticgdm01b142	-ve	notadj	1.0365	0.0510196	0.73	0.466	0.941178	1.14148	.logisticgdm01b142matbmimatagei.sex12i.PET12i.ethnicityi.paritycodei.intervention	b142	adj	1.07324	0.0552279	1.37	0.17	0.970278	1.18714
20716	SM(41:1)	0.401246	.logisticgdm01b143	-ve	notadj	0.949905	0.0521252	-0.94	0.349	0.853044	1.05777	.logisticgdm01b143matbmimatagei.sex12i.PET12i.ethnicityi.paritycodei.intervention	b143	adj	0.92617	0.0527901	-1.35	0.178	0.828273	1.03564
20758	TG(48:3)	0.417572	.logisticgdm01b144	-ve	notadj	0.967941	0.0382295	-0.83	0.409	0.895839	1.04585	.logisticgdm01b144matbmimatagei.sex12i.PET12i.ethnicityi.paritycodei.intervention	b144	adj	0.979259	0.0399825	-0.51	0.608	0.903949	1.06085
20800	TG(49:1)	0.419081	.logisticgdm01b145	-ve	notadj	1.02902	0.0308027	0.96	0.339	0.970384	1.0912	.logisticgdm01b145matbmimatagei.sex12i.PET12i.ethnicityi.paritycodei.intervention	b145	adj	1.01296	0.0317904	0.41	0.682	0.952529	1.07722
20842	TG(53:7)	0.419842	.logisticgdm01b146	-ve	notadj	0.994115	0.031777	-0.18	0.853	0.933744	1.05839	.logisticgdm01b146matbmimatagei.sex12i.PET12i.ethnicityi.paritycodei.intervention	b146	adj	1.00199	0.0333438	0.06	0.952	0.938725	1.06952
20884	PE(36:1) & PC(33:1)	0.425328	.logisticgdm01b147	-ve	notadj	0.992993	0.0464007	-0.15	0.88	0.906089	1.08823	.logisticgdm01b147matbmimatagei.sex12i.PET12i.ethnicityi.paritycodei.intervention	b147	adj	1.02224	0.0514428	0.44	0.662	0.926225	1.1282
20926	TG(58:8)	0.431254	.logisticgdm01b148	-ve	notadj	1.03273	0.0308421	1.08	0.281	0.974018	1.09499	.logisticgdm01b148matbmimatagei.sex12i.PET12i.ethnicityi.paritycodei.intervention	b148	adj	1.03284	0.0319383	1.05	0.296	0.972105	1.09738
20968	PE(35:0) & PC(32:0)	0.434824	.logisticgdm01b149	-ve	notadj	0.956801	0.0530616	-0.8	0.426	0.858255	1.06666	.logisticgdm01b149matbmimatagei.sex12i.PET12i.ethnicityi.paritycodei.intervention	b149	adj	0.913364	0.052638	-1.57	0.116	0.815809	1.02259
21010	CE(20:4)	0.435007	.logisticgdm01b150	-ve	notadj	0.966778	0.0351093	-0.93	0.352	0.900357	1.0381	.logisticgdm01b150matbmimatagei.sex12i.PET12i.ethnicityi.paritycodei.intervention	b150	adj	0.952888	0.0364052	-1.26	0.207	0.884142	1.02698
21052	TG(56:5)	0.438448	.logisticgdm01b151	-ve	notadj	1.05046	0.0475593	1.09	0.277	0.961265	1.14794	.logisticgdm01b151matbmimatagei.sex12i.PET12i.ethnicityi.paritycodei.intervention	b151	adj	1.09039	0.0517186	1.82	0.068	0.993596	1.19662
21094	SM(46:1)	0.439171	.logisticgdm01b152	-ve	notadj	1.03644	0.0463938	0.8	0.424	0.949383	1.13148	.logisticgdm01b152matbmimatagei.sex12i.PET12i.ethnicityi.paritycodei.intervention	b152	adj	1.05899	0.0498032	1.22	0.223	0.965743	1.16125
21136	DG-H20(36:5)	0.444128	.logisticgdm01b153	-ve	notadj	1.00397	0.0149365	0.27	0.79	0.975116	1.03367	.logisticgdm01b153matbmimatagei.sex12i.PET12i.ethnicityi.paritycodei.intervention	b153	adj	1.00417	0.0155548	0.27	0.788	0.974141	1.03512
21178	TG(44:4)	0.445404	.logisticgdm01b154	-ve	notadj	0.939007	0.0502352	-1.18	0.239	0.845535	1.04281	.logisticgdm01b154matbmimatagei.sex12i.PET12i.ethnicityi.paritycodei.intervention	b154	adj	0.935338	0.0508405	-1.23	0.219	0.840817	1.04049
21220	PC(38:3) & PE(41:3)	0.446319	.logisticgdm01b155	-ve	notadj	1.04255	0.042188	1.03	0.303	0.963056	1.1286	.logisticgdm01b155matbmimatagei.sex12i.PET12i.ethnicityi.paritycodei.intervention	b155	adj	1.04765	0.0447839	1.09	0.276	0.963449	1.1392
21262	TG(48:2)	0.455087	.logisticgdm01b156	-ve	notadj	1.03568	0.0447945	0.81	0.418	0.951507	1.12731	.logisticgdm01b156matbmimatagei.sex12i.PET12i.ethnicityi.paritycodei.intervention	b156	adj	1.05096	0.0474143	1.1	0.271	0.962016	1.14812
21304	PC-O(46:7) & PC-P(46:6)	0.462356	.logisticgdm01b157	-ve	notadj	0.995632	0.0198936	-0.22	0.827	0.957395	1.0354	.logisticgdm01b157matbmimatagei.sex12i.PET12i.ethnicityi.paritycodei.intervention	b157	adj	0.99754	0.0203956	-0.12	0.904	0.958356	1.03833
21346	LysoPC(16:1)	0.465065	.logisticgdm01b158	-ve	notadj	0.977296	0.0208905	-1.07	0.283	0.937198	1.01911	.logisticgdm01b158matbmimatagei.sex12i.PET12i.ethnicityi.paritycodei.intervention	b158	adj	0.991824	0.0218438	-0.37	0.709	0.949922	1.03557
21388	PC(38:6)	0.4663	.logisticgdm01b159	-ve	notadj	0.947286	0.0555784	-0.92	0.356	0.844384	1.06273	.logisticgdm01b159matbmimatagei.sex12i.PET12i.ethnicityi.paritycodei.intervention	b159	adj	0.892836	0.0573364	-1.77	0.078	0.787243	1.01259
21430	DG-H20(30:1)	0.479364	.logisticgdm01b160	-ve	notadj	0.97941	0.0253275	-0.8	0.421	0.931007	1.03033	.logisticgdm01b160matbmimatagei.sex12i.PET12i.ethnicityi.paritycodei.intervention	b160	adj	0.989321	0.0264475	-0.4	0.688	0.93882	1.04254
21472	PE(35:2) & PC(32:2)	0.48266	.logisticgdm01b161	-ve	notadj	0.973488	0.0505283	-0.52	0.605	0.879326	1.07774	.logisticgdm01b161matbmimatagei.sex12i.PET12i.ethnicityi.paritycodei.intervention	b161	adj	0.992023	0.0539744	-0.15	0.883	0.891681	1.10366
21514	DG-H20(38:3)	0.486185	.logisticgdm01b162	-ve	notadj	1.01559	0.0233244	0.67	0.501	0.970889	1.06235	.logisticgdm01b162matbmimatagei.sex12i.PET12i.ethnicityi.paritycodei.intervention	b162	adj	1.01651	0.0245525	0.68	0.498	0.969511	1.06579
21556	SM(44:4)	0.496638	.logisticgdm01b163	-ve	notadj	0.981717	0.0243129	-0.75	0.456	0.935203	1.03055	.logisticgdm01b163matbmimatagei.sex12i.PET12i.ethnicityi.paritycodei.intervention	b163	adj	0.977924	0.025478	-0.86	0.392	0.929242	1.02916
21598	SM(40:1)	0.498341	.logisticgdm01b164	-ve	notadj	0.962595	0.0505391	-0.73	0.468	0.868467	1.06693	.logisticgdm01b164matbmimatagei.sex12i.PET12i.ethnicityi.paritycodei.intervention	b164	adj	0.944795	0.05155	-1.04	0.298	0.848974	1.05143
21640	CE(20:3)	0.504724	.logisticgdm01b165	-ve	notadj	0.994539	0.0318411	-0.17	0.864	0.934049	1.05895	.logisticgdm01b165matbmimatagei.sex12i.PET12i.ethnicityi.paritycodei.intervention	b165	adj	1.00256	0.0333122	0.08	0.939	0.939346	1.07002
21682	TG(56:6)	0.537959	.logisticgdm01b166	-ve	notadj	0.983476	0.0376632	-0.44	0.664	0.91236	1.06014	.logisticgdm01b166matbmimatagei.sex12i.PET12i.ethnicityi.paritycodei.intervention	b166	adj	0.985564	0.0387841	-0.37	0.712	0.912406	1.06459
21724	TG(55:5)	0.540317	.logisticgdm01b167	-ve	notadj	0.996083	0.0129324	-0.3	0.762	0.971056	1.02175	.logisticgdm01b167matbmimatagei.sex12i.PET12i.ethnicityi.paritycodei.intervention	b167	adj	0.998922	0.0134875	-0.08	0.936	0.972834	1.02571
21766	DG(36:3)	0.563208	.logisticgdm01b168	-ve	notadj	1.02511	0.0496856	0.51	0.609	0.932208	1.12726	.logisticgdm01b168matbmimatagei.sex12i.PET12i.ethnicityi.paritycodei.intervention	b168	adj	1.02101	0.0522308	0.41	0.684	0.923605	1.12869
21808	PC-O(40:9) & PC-P(40:8)	0.57703	.logisticgdm01b169	-ve	notadj	0.990172	0.013643	-0.72	0.473	0.96379	1.01728	.logisticgdm01b169matbmimatagei.sex12i.PET12i.ethnicityi.paritycodei.intervention	b169	adj	0.982263	0.0144733	-1.21	0.225	0.954302	1.01104
21850	PC(40:5) & PE(43:5)	0.579242	.logisticgdm01b170	-ve	notadj	0.974897	0.0455073	-0.54	0.586	0.889662	1.0683	.logisticgdm01b170matbmimatagei.sex12i.PET12i.ethnicityi.paritycodei.intervention	b170	adj	0.959656	0.0464115	-0.85	0.395	0.87287	1.05507
21892	CE(16:0)	0.580279	.logisticgdm01b171	-ve	notadj	0.971235	0.0421074	-0.67	0.501	0.892115	1.05737	.logisticgdm01b171matbmimatagei.sex12i.PET12i.ethnicityi.paritycodei.intervention	b171	adj	0.957052	0.0433909	-0.97	0.333	0.875677	1.04599
21934	SM(35:1)	0.600339	.logisticgdm01b172	-ve	notadj	1.0135	0.0331684	0.41	0.682	0.950531	1.08064	.logisticgdm01b172matbmimatagei.sex12i.PET12i.ethnicityi.paritycodei.intervention	b172	adj	1.00249	0.036166	0.07	0.945	0.934049	1.07594
21976	SM(35:1)**IS	0.600466	.logisticgdm01b173	-ve	notadj	1.01351	0.0331964	0.41	0.682	0.950486	1.0807	.logisticgdm01b173matbmimatagei.sex12i.PET12i.ethnicityi.paritycodei.intervention	b173	adj	1.00246	0.0361896	0.07	0.946	0.933984	1.07596
22018	TG(42:5)	0.606792	.logisticgdm01b174	-ve	notadj	0.976494	0.0428898	-0.54	0.588	0.895949	1.06428	.logisticgdm01b174matbmimatagei.sex12i.PET12i.ethnicityi.paritycodei.intervention	b174	adj	0.950865	0.0434906	-1.1	0.271	0.869334	1.04004
22060	SM(42:5)	0.609703	.logisticgdm01b175	-ve	notadj	0.988719	0.0244407	-0.46	0.646	0.941958	1.0378	.logisticgdm01b175matbmimatagei.sex12i.PET12i.ethnicityi.paritycodei.intervention	b175	adj	0.976608	0.0250344	-0.92	0.356	0.928754	1.02693
22102	TG(51:2)	0.623666	.logisticgdm01b176	-ve	notadj	1.04242	0.0583432	0.74	0.458	0.934122	1.16328	.logisticgdm01b176matbmimatagei.sex12i.PET12i.ethnicityi.paritycodei.intervention	b176	adj	1.06346	0.0635469	1.03	0.303	0.945926	1.19559
22144	PC-O(42:5) & PC-P(42:4)	0.653927	.logisticgdm01b177	-ve	notadj	0.992662	0.0197768	-0.37	0.712	0.954647	1.03219	.logisticgdm01b177matbmimatagei.sex12i.PET12i.ethnicityi.paritycodei.intervention	b177	adj	1.0088	0.0200197	0.44	0.659	0.97032	1.04882
22186	TG(46:2)	0.673891	.logisticgdm01b178	-ve	notadj	0.98868	0.0266789	-0.42	0.673	0.937749	1.04238	.logisticgdm01b178matbmimatagei.sex12i.PET12i.ethnicityi.paritycodei.intervention	b178	adj	0.98668	0.027531	-0.48	0.631	0.934169	1.04214
22228	TG(44:1)	0.676906	.logisticgdm01b179	-ve	notadj	1.00421	0.0199219	0.21	0.832	0.965914	1.04403	.logisticgdm01b179matbmimatagei.sex12i.PET12i.ethnicityi.paritycodei.intervention	b179	adj	0.99852	0.0206517	-0.07	0.943	0.958853	1.03983
22270	SM(39:2)	0.681749	.logisticgdm01b180	-ve	notadj	0.981376	0.0236952	-0.78	0.436	0.936016	1.02893	.logisticgdm01b180matbmimatagei.sex12i.PET12i.ethnicityi.paritycodei.intervention	b180	adj	0.974058	0.0249781	-1.02	0.305	0.926312	1.02426
22312	TG(46:3)	0.68435	.logisticgdm01b181	-ve	notadj	0.997813	0.0196658	-0.11	0.912	0.960004	1.03711	.logisticgdm01b181matbmimatagei.sex12i.PET12i.ethnicityi.paritycodei.intervention	b181	adj	0.996403	0.020339	-0.18	0.86	0.957326	1.03707
22354	TG_oxid(36:0)	0.690908	.logisticgdm01b182	-ve	notadj	0.991831	0.0392934	-0.21	0.836	0.917731	1.07191	.logisticgdm01b182matbmimatagei.sex12i.PET12i.ethnicityi.paritycodei.intervention	b182	adj	0.994156	0.0420579	-0.14	0.89	0.915049	1.0801
22396	PC-O(32:1) & PC-P(32:0)	0.698604	.logisticgdm01b183	-ve	notadj	0.972971	0.0339708	-0.78	0.433	0.908616	1.04188	.logisticgdm01b183matbmimatagei.sex12i.PET12i.ethnicityi.paritycodei.intervention	b183	adj	0.979548	0.0341656	-0.59	0.554	0.914823	1.04885
22438	DG-H20(30:2)	0.700253	.logisticgdm01b184	-ve	notadj	0.982383	0.0224292	-0.78	0.436	0.939392	1.02734	.logisticgdm01b184matbmimatagei.sex12i.PET12i.ethnicityi.paritycodei.intervention	b184	adj	0.975438	0.0237707	-1.02	0.307	0.929943	1.02316
22480	SM(42:0)	0.70551	.logisticgdm01b185	-ve	notadj	0.973142	0.0363651	-0.73	0.466	0.904415	1.04709	.logisticgdm01b185matbmimatagei.sex12i.PET12i.ethnicityi.paritycodei.intervention	b185	adj	0.984034	0.0391317	-0.4	0.686	0.91025	1.0638
22522	DG-H20(36:2)	0.712779	.logisticgdm01b186	-ve	notadj	0.98677	0.0562408	-0.23	0.815	0.882474	1.10339	.logisticgdm01b186matbmimatagei.sex12i.PET12i.ethnicityi.paritycodei.intervention	b186	adj	1.02269	0.0615928	0.37	0.709	0.908824	1.15082
22564	TG(49:2)	0.714093	.logisticgdm01b187	-ve	notadj	1.01537	0.0323425	0.48	0.632	0.953919	1.08078	.logisticgdm01b187matbmimatagei.sex12i.PET12i.ethnicityi.paritycodei.intervention	b187	adj	1.0068	0.0334741	0.2	0.838	0.943288	1.0746
22606	TG(54:2)	0.736938	.logisticgdm01b188	-ve	notadj	1.03118	0.0482183	0.66	0.511	0.940872	1.13015	.logisticgdm01b188matbmimatagei.sex12i.PET12i.ethnicityi.paritycodei.intervention	b188	adj	1.05635	0.0508585	1.14	0.255	0.961229	1.16089
22648	PE(41:4) & PC(38:4)	0.744729	.logisticgdm01b189	-ve	notadj	0.990712	0.0463472	-0.2	0.842	0.903914	1.08585	.logisticgdm01b189matbmimatagei.sex12i.PET12i.ethnicityi.paritycodei.intervention	b189	adj	0.958144	0.0468943	-0.87	0.382	0.870504	1.05461
22690	PE(40:5) & PC(37:5)	0.752368	.logisticgdm01b190	-ve	notadj	1.00382	0.0248559	0.15	0.878	0.956263	1.05373	.logisticgdm01b190matbmimatagei.sex12i.PET12i.ethnicityi.paritycodei.intervention	b190	adj	0.992141	0.0258175	-0.3	0.762	0.942808	1.04405
22732	DG(36:4)	0.763672	.logisticgdm01b191	-ve	notadj	0.998445	0.0193758	-0.08	0.936	0.961182	1.03715	.logisticgdm01b191matbmimatagei.sex12i.PET12i.ethnicityi.paritycodei.intervention	b191	adj	0.997681	0.020132	-0.12	0.908	0.958993	1.03793
22774	SM(43:4)	0.767693	.logisticgdm01b192	-ve	notadj	0.992621	0.0180008	-0.41	0.683	0.957959	1.02854	.logisticgdm01b192matbmimatagei.sex12i.PET12i.ethnicityi.paritycodei.intervention	b192	adj	0.991811	0.019184	-0.43	0.671	0.954915	1.03013
22816	PC-P(42:3) & PC-O(42:4)	0.771938	.logisticgdm01b193	-ve	notadj	0.989634	0.0187012	-0.55	0.581	0.953651	1.02697	.logisticgdm01b193matbmimatagei.sex12i.PET12i.ethnicityi.paritycodei.intervention	b193	adj	0.999471	0.0187666	-0.03	0.978	0.963358	1.03694
22858	PC-O(40:5)	0.78016	.logisticgdm01b194	-ve	notadj	0.931137	0.0303058	-2.19	0.028	0.873593	0.992471	.logisticgdm01b194matbmimatagei.sex12i.PET12i.ethnicityi.paritycodei.intervention	b194	adj	0.941449	0.0304399	-1.87	0.062	0.883639	1.00304
22900	SM(43:5)	0.780331	.logisticgdm01b195	-ve	notadj	0.992525	0.0171211	-0.43	0.664	0.959529	1.02666	.logisticgdm01b195matbmimatagei.sex12i.PET12i.ethnicityi.paritycodei.intervention	b195	adj	0.989117	0.0179536	-0.6	0.547	0.954547	1.02494
22942	TG(54:4)	0.794065	.logisticgdm01b196	-ve	notadj	1.00268	0.0465368	0.06	0.954	0.915491	1.09816	.logisticgdm01b196matbmimatagei.sex12i.PET12i.ethnicityi.paritycodei.intervention	b196	adj	1.01788	0.0491567	0.37	0.714	0.925957	1.11894
22984	TG(48:8)	0.816417	.logisticgdm01b197	-ve	notadj	1.00141	0.0231901	0.06	0.951	0.956974	1.04791	.logisticgdm01b197matbmimatagei.sex12i.PET12i.ethnicityi.paritycodei.intervention	b197	adj	0.995684	0.0240582	-0.18	0.858	0.949631	1.04397
23026	DG(32:1)	0.840193	.logisticgdm01b198	-ve	notadj	0.997676	0.013728	-0.17	0.866	0.97113	1.02495	.logisticgdm01b198matbmimatagei.sex12i.PET12i.ethnicityi.paritycodei.intervention	b198	adj	0.994251	0.0142402	-0.4	0.687	0.966729	1.02256
23068	TG(55:8)	0.847744	.logisticgdm01b199	-ve	notadj	0.996732	0.0131019	-0.25	0.803	0.971381	1.02275	.logisticgdm01b199matbmimatagei.sex12i.PET12i.ethnicityi.paritycodei.intervention	b199	adj	0.99637	0.0138211	-0.26	0.793	0.969646	1.02383
23110	TG(45:4)	0.850081	.logisticgdm01b200	-ve	notadj	1.00986	0.0326338	0.3	0.761	0.947879	1.07589	.logisticgdm01b200matbmimatagei.sex12i.PET12i.ethnicityi.paritycodei.intervention	b200	adj	1.003	0.0366968	0.08	0.935	0.933597	1.07757
23152	CE(14:0)	0.855911	.logisticgdm01b201	-ve	notadj	1.00814	0.026062	0.31	0.754	0.958332	1.06054	.logisticgdm01b201matbmimatagei.sex12i.PET12i.ethnicityi.paritycodei.intervention	b201	adj	1.01616	0.0272829	0.6	0.55	0.964074	1.07107
23194	PC(36:4)	0.856665	.logisticgdm01b202	-ve	notadj	0.998121	0.0523373	-0.04	0.971	0.900637	1.10616	.logisticgdm01b202matbmimatagei.sex12i.PET12i.ethnicityi.paritycodei.intervention	b202	adj	0.96072	0.0525184	-0.73	0.464	0.863108	1.06937
23236	SM(37:1)	0.871352	.logisticgdm01b203	-ve	notadj	0.994763	0.0260096	-0.2	0.841	0.94507	1.04707	.logisticgdm01b203matbmimatagei.sex12i.PET12i.ethnicityi.paritycodei.intervention	b203	adj	0.995514	0.0276638	-0.16	0.871	0.942744	1.05124
23278	PC(37:6) & PE(40:6)	0.88124	.logisticgdm01b204	-ve	notadj	1.00391	0.0281449	0.14	0.889	0.950232	1.06061	.logisticgdm01b204matbmimatagei.sex12i.PET12i.ethnicityi.paritycodei.intervention	b204	adj	0.9873	0.0292842	-0.43	0.667	0.93154	1.0464
23320	PC(36:5) & PE(39:5)	0.884345	.logisticgdm01b205	-ve	notadj	0.989011	0.0321942	-0.34	0.734	0.927882	1.05417	.logisticgdm01b205matbmimatagei.sex12i.PET12i.ethnicityi.paritycodei.intervention	b205	adj	0.970742	0.0333583	-0.86	0.388	0.907514	1.03838
23362	LysoPC(20:3)	0.886652	.logisticgdm01b206	-ve	notadj	1.0003	0.0131511	0.02	0.982	0.974857	1.02641	.logisticgdm01b206matbmimatagei.sex12i.PET12i.ethnicityi.paritycodei.intervention	b206	adj	1.00681	0.0134344	0.51	0.611	0.980818	1.03348
23404	TG(51:3)	0.887464	.logisticgdm01b207	-ve	notadj	1.00385	0.0535919	0.07	0.943	0.904116	1.11458	.logisticgdm01b207matbmimatagei.sex12i.PET12i.ethnicityi.paritycodei.intervention	b207	adj	1.01209	0.0565812	0.21	0.83	0.907052	1.12929
23446	PC(42:9)	0.917269	.logisticgdm01b208	-ve	notadj	1.00127	0.0216957	0.06	0.953	0.959641	1.04471	.logisticgdm01b208matbmimatagei.sex12i.PET12i.ethnicityi.paritycodei.intervention	b208	adj	0.9896	0.0229112	-0.45	0.652	0.945698	1.03554
23488	TG(49:5)	0.918059	.logisticgdm01b209	-ve	notadj	0.965356	0.0214593	-1.59	0.113	0.9242	1.00835	.logisticgdm01b209matbmimatagei.sex12i.PET12i.ethnicityi.paritycodei.intervention	b209	adj	0.96618	0.0216441	-1.54	0.125	0.924677	1.00955
23530	SM(33:2)	0.918478	.logisticgdm01b210	-ve	notadj	0.999722	0.0092886	-0.03	0.976	0.981681	1.01809	.logisticgdm01b210matbmimatagei.sex12i.PET12i.ethnicityi.paritycodei.intervention	b210	adj	0.999067	0.0096703	-0.1	0.923	0.980292	1.0182
23572	DG-H20(18:0)	0.922896	.logisticgdm01b211	-ve	notadj	1.00093	0.0067688	0.14	0.891	0.987749	1.01428	.logisticgdm01b211matbmimatagei.sex12i.PET12i.ethnicityi.paritycodei.intervention	b211	adj	1.00395	0.0071349	0.55	0.579	0.990063	1.01803
23614	DG(36:2)	0.957392	.logisticgdm01b212	-ve	notadj	1.01163	0.0497462	0.24	0.814	0.918679	1.11398	.logisticgdm01b212matbmimatagei.sex12i.PET12i.ethnicityi.paritycodei.intervention	b212	adj	1.04636	0.0550841	0.86	0.389	0.943781	1.16009
23656	TG(46:1)	0.967951	.logisticgdm01b213	-ve	notadj	0.995213	0.0294424	-0.16	0.871	0.939148	1.05462	.logisticgdm01b213matbmimatagei.sex12i.PET12i.ethnicityi.paritycodei.intervention	b213	adj	0.996763	0.0305213	-0.11	0.916	0.938702	1.05842
23698	TG(53:6)	0.969048	.logisticgdm01b214	-ve	notadj	1.02473	0.0341105	0.73	0.463	0.960003	1.09381	.logisticgdm01b214matbmimatagei.sex12i.PET12i.ethnicityi.paritycodei.intervention	b214	adj	1.05302	0.0367387	1.48	0.139	0.98342	1.12755
23740	PE(40:3) & PC(37:3)	0.982619	.logisticgdm01b215	-ve	notadj	1.0004	0.0160009	0.03	0.98	0.96953	1.03226	.logisticgdm01b215matbmimatagei.sex12i.PET12i.ethnicityi.paritycodei.intervention	b215	adj	0.999433	0.0166277	-0.03	0.973	0.967369	1.03256
23782	TG(56:3)	0.983209	.logisticgdm01b216	-ve	notadj	1.01389	0.0401568	0.35	0.728	0.938157	1.09573	.logisticgdm01b216matbmimatagei.sex12i.PET12i.ethnicityi.paritycodei.intervention	b216	adj	1.02812	0.0417787	0.68	0.495	0.949414	1.11336

## Sheet: SI Table FINAL
		Not adjusted						Adjusted							FDR	0.0020998
Var.	Mode	OR	SE	z	P>|z|	95% CI		OR	SE	z	P>|z|	95% CI
CE(14:0)	+ve	1.00814	0.026062	0.31	0.754	0.958332	1.06054	1.01616	0.0272829	0.6	0.55	0.964074	1.07107
CE(16:0)	+ve	0.971235	0.0421074	-0.67	0.501	0.892115	1.05737	0.957052	0.0433909	-0.97	0.333	0.875677	1.04599
CE(16:1)	+ve	1.05174	0.0329417	1.61	0.107	0.989122	1.11833	1.07879	0.0363539	2.25	0.024	1.00984	1.15244
CE(18:1)	+ve	0.939288	0.0411898	-1.43	0.153	0.86193	1.02359	0.951494	0.0435726	-1.09	0.278	0.869814	1.04085
CE(18:2)	+ve	0.939424	0.0405706	-1.45	0.148	0.863179	1.0224	0.928705	0.0420674	-1.63	0.102	0.849809	1.01493
CE(18:3)	+ve	1.08906	0.0329258	2.82	0.005	1.0264	1.15555	1.11047	0.0360238	3.23	0.001	1.04206	1.18336
CE(20:3)	+ve	0.994539	0.0318411	-0.17	0.864	0.934049	1.05895	1.00256	0.0333122	0.08	0.939	0.939346	1.07002
CE(20:4)	+ve	0.966778	0.0351093	-0.93	0.352	0.900357	1.0381	0.952888	0.0364052	-1.26	0.207	0.884142	1.02698
CE(20:5)	+ve	1.04188	0.0127503	3.35	0.001	1.01719	1.06718	1.03485	0.0130784	2.71	0.007	1.00953	1.06081
Cer(36:5)	+ve	0.979963	0.0131948	-1.5	0.133	0.95444	1.00617	0.979141	0.0133961	-1.54	0.123	0.953234	1.00575
Cer(41:1)_[M-H]1-	-ve	1.08614	0.042037	2.13	0.033	1.0068	1.17174	1.08443	0.043559	2.02	0.044	1.00233	1.17325
Cer(42:1)_[M+Cl]1-	-ve	1.01499	0.0276958	0.55	0.586	0.962132	1.07075	1.0249	0.0291471	0.86	0.387	0.96934	1.08365
Cer(42:1)_[M+OAc]1-	-ve	1.04614	0.0401543	1.18	0.24	0.970329	1.12788	1.04505	0.041109	1.12	0.263	0.967502	1.12881
Cer(42:1)_[M-H]1-	-ve	1.01608	0.0477761	0.34	0.734	0.926627	1.11417	1.02156	0.0496449	0.44	0.661	0.928752	1.12365
Cer(42:2)_[M+Cl]1-	-ve	1.03263	0.0311827	1.06	0.288	0.97329	1.0956	1.04958	0.0326911	1.55	0.12	0.987425	1.11565
Cer(42:2)_[M+OAc]1-	-ve	1.07688	0.0591101	1.35	0.177	0.967036	1.19919	1.08845	0.0629821	1.46	0.143	0.971753	1.21917
Cer(42:2)_[M-H]1-	-ve	1.0201	0.0585885	0.35	0.729	0.911493	1.14164	1.02229	0.0609092	0.37	0.711	0.909617	1.14892
Cholesterol-loss OH	+ve	0.942374	0.0446021	-1.25	0.21	0.858887	1.03398	0.929338	0.0461007	-1.48	0.14	0.843235	1.02423
CL(70:1)_[M]2-	-ve	0.960695	0.084427	-0.46	0.648	0.808687	1.14127	0.973822	0.0922729	-0.28	0.78	0.80877	1.17256
CL(72:1)_[M]2-	-ve	0.984074	0.0526621	-0.3	0.764	0.886087	1.0929	0.950097	0.0540484	-0.9	0.368	0.849857	1.06216
CL(72:2)_[M]2-	-ve	0.973199	0.0284553	-0.93	0.353	0.918996	1.0306	0.96978	0.0292198	-1.02	0.308	0.914168	1.02877
CL(74:3)_[M]2-	-ve	1.1007	0.115729	0.91	0.361	0.895718	1.35258	1.06947	0.11736	0.61	0.541	0.862501	1.3261
CL(74:5)_[M]2-	-ve	0.918953	0.0740269	-1.05	0.294	0.784737	1.07612	0.909808	0.0760826	-1.13	0.258	0.772268	1.07184
CL(78:5)_[M]2-	-ve	1.02613	0.0967679	0.27	0.784	0.852963	1.23445	1.03899	0.10446	0.38	0.704	0.853162	1.26529
DG(18:0)_[M-H2O]1+	+ve	1.00093	0.0067688	0.14	0.891	0.987749	1.01428	1.00395	0.0071349	0.55	0.579	0.990063	1.01803
DG(30:0)_[M-H2O]1+	+ve	1.03705	0.0377879	1	0.318	0.965567	1.11382	1.0345	0.0390728	0.9	0.369	0.960688	1.11399
DG(30:1)_[M-H2O]1+	+ve	0.97941	0.0253275	-0.8	0.421	0.931007	1.03033	0.989321	0.0264475	-0.4	0.688	0.93882	1.04254
DG(30:2)_[M-H2O]1+	+ve	0.982383	0.0224292	-0.78	0.436	0.939392	1.02734	0.975438	0.0237707	-1.02	0.307	0.929943	1.02316
DG(32:0)_[M-H2O]1+	+ve	1.19418	0.0560599	3.78	0	1.08921	1.30927	1.18002	0.0574174	3.4	0.001	1.07269	1.2981
DG(32:1)	+ve	0.997676	0.013728	-0.17	0.866	0.97113	1.02495	0.994251	0.0142402	-0.4	0.687	0.966729	1.02256
DG(32:2)_[M-H2O]1+	+ve	1.04279	0.0351021	1.24	0.213	0.976209	1.11391	1.03872	0.0357604	1.1	0.27	0.97094	1.11122
DG(33:2)_[M-H2O]1+	+ve	0.934946	0.0253373	-2.48	0.013	0.886582	0.985949	0.945754	0.0264347	-2	0.046	0.895337	0.999011
DG(34:1)	+ve	1.07421	0.0361481	2.13	0.033	1.00565	1.14745	1.08573	0.0384081	2.33	0.02	1.013	1.16368
DG(34:1)_[M-H2O]1+	+ve	1.12918	0.0657038	2.09	0.037	1.00747	1.26559	1.16253	0.0714718	2.45	0.014	1.03056	1.3114
DG(34:2)	+ve	1.03769	0.039912	0.96	0.336	0.962338	1.11894	1.04358	0.0419033	1.06	0.288	0.964603	1.12903
DG(34:2)_[M-H2O]1+	+ve	1.153	0.069716	2.35	0.019	1.02415	1.29807	1.15353	0.0728484	2.26	0.024	1.01923	1.30552
DG(34:3)_[M-H2O]1+	+ve	1.13607	0.0588937	2.46	0.014	1.02632	1.25757	1.20886	0.0671067	3.42	0.001	1.08424	1.34781
DG(35:2)_[M-H2O]1+	+ve	1.04186	0.027739	1.54	0.123	0.988889	1.09767	1.04871	0.0315817	1.58	0.114	0.9886	1.11247
DG(36:1)_[M-H2O]1+	+ve	1.05125	0.0392203	1.34	0.18	0.97712	1.131	1.05439	0.0407579	1.37	0.171	0.977453	1.13737
DG(36:2)	+ve	1.01163	0.0497462	0.24	0.814	0.918679	1.11398	1.04636	0.0550841	0.86	0.389	0.943781	1.16009
DG(36:2)_[M-H2O]1+	+ve	0.98677	0.0562408	-0.23	0.815	0.882474	1.10339	1.02269	0.0615928	0.37	0.709	0.908824	1.15082
DG(36:3)	+ve	1.02511	0.0496856	0.51	0.609	0.932208	1.12726	1.02101	0.0522308	0.41	0.684	0.923605	1.12869
DG(36:3)_[M-H2O]1+	+ve	1.06188	0.0559766	1.14	0.255	0.957648	1.17746	1.06772	0.0591547	1.18	0.237	0.957849	1.19019
DG(36:4)	+ve	0.998445	0.0193758	-0.08	0.936	0.961182	1.03715	0.997681	0.020132	-0.12	0.908	0.958993	1.03793
DG(36:4)_[M-H2O]1+	+ve	1.12326	0.0510619	2.56	0.011	1.02751	1.22793	1.13186	0.0553115	2.53	0.011	1.02848	1.24562
DG(36:5)_[M-H2O]1+	+ve	1.00397	0.0149365	0.27	0.79	0.975116	1.03367	1.00417	0.0155548	0.27	0.788	0.974141	1.03512
DG(38:0)	+ve	0.969249	0.0353738	-0.86	0.392	0.902339	1.04112	0.987518	0.0373549	-0.33	0.74	0.916952	1.06351
DG(38:3)_[M-H2O]1+	+ve	1.01559	0.0233244	0.67	0.501	0.970889	1.06235	1.01651	0.0245525	0.68	0.498	0.969511	1.06579
DG(38:5)_[M-H2O]1+	+ve	1.08498	0.033927	2.61	0.009	1.02048	1.15356	1.08949	0.0349401	2.67	0.008	1.02311	1.16016
DG(38:6)_[M-H2O]1+	+ve	1.09414	0.0345845	2.85	0.004	1.02842	1.16407	1.06854	0.0339481	2.09	0.037	1.00403	1.13719
DG(44:11)	+ve	1.05072	0.0446368	1.16	0.244	0.966777	1.14195	1.08198	0.0504141	1.69	0.091	0.987553	1.18545
DG(46:7)_[M-H2O]1+	+ve	0.972295	0.0259671	-1.05	0.293	0.92271	1.02455	0.967584	0.027056	-1.18	0.239	0.915982	1.02209
FA(18:3)_[M-H]1-	-ve	0.966991	0.0333294	-0.97	0.33	0.903824	1.03457	0.953178	0.035257	-1.3	0.195	0.886521	1.02485
FA(22:4)_[M-H]1-	-ve	1.01805	0.0260031	0.7	0.484	0.96834	1.07031	1.00389	0.0271677	0.14	0.886	0.952034	1.05858
FA(22:6)_[M-H]1-	-ve	1.01355	0.0269886	0.51	0.613	0.962009	1.06785	0.998606	0.0298309	-0.05	0.963	0.941818	1.05882
LPA(36:0)_[M]-	-ve	0.997512	0.0830058	-0.03	0.976	0.847398	1.17422	0.957969	0.0824338	-0.5	0.618	0.809292	1.13396
LPC(15:0)	+ve	0.977577	0.0148029	-1.5	0.134	0.94899	1.00703	0.976959	0.0149462	-1.52	0.128	0.948099	1.0067
LPC(15:0)_[M+OAc]1- & PIP(46:2)	-ve	0.839646	0.0487002	-3.01	0.003	0.749421	0.940734	0.855919	0.0505479	-2.63	0.008	0.762365	0.960952
LPC(16:0)	+ve	0.830061	0.0422456	-3.66	0	0.751257	0.917131	0.835789	0.0439286	-3.41	0.001	0.753977	0.926478
LPC(16:1)	+ve	0.977296	0.0208905	-1.07	0.283	0.937198	1.01911	0.991824	0.0218438	-0.37	0.709	0.949922	1.03557
LPC(17:0)	+ve	0.959093	0.0149657	-2.68	0.007	0.930205	0.988878	0.957667	0.0154252	-2.69	0.007	0.927906	0.988382
LPC(18:0) & PC-O(18:0)	+ve	0.891844	0.0374978	-2.72	0.006	0.821296	0.968451	0.88558	0.0388291	-2.77	0.006	0.812655	0.96505
LPC(18:1) & PC-P(18:0)	+ve	0.819399	0.0317759	-5.14	0	0.759427	0.884107	0.832004	0.0332621	-4.6	0	0.7693	0.899819
LPC(18:3)	+ve	0.945508	0.0275071	-1.93	0.054	0.893104	1.00099	0.952653	0.0282817	-1.63	0.102	0.898804	1.00973
LPC(20:3)	+ve	1.0003	0.0131511	0.02	0.982	0.974857	1.02641	1.00681	0.0134344	0.51	0.611	0.980818	1.03348
LPC(20:5)	+ve	0.977894	0.0113508	-1.93	0.054	0.955898	1.0004	0.976869	0.0117602	-1.94	0.052	0.954089	1.00019
LPE(16:0)_[M-H]1-	-ve	0.88112	0.0496904	-2.24	0.025	0.788918	0.984098	0.890793	0.0511694	-2.01	0.044	0.795942	0.996947
LPE(18:0)_[M-H]1-	-ve	0.907976	0.0714644	-1.23	0.22	0.778177	1.05943	0.922826	0.0743292	-1	0.319	0.788061	1.08064
LPE(18:1)_[M-H]1-	-ve	0.864032	0.0451901	-2.79	0.005	0.779849	0.957302	0.883011	0.0475484	-2.31	0.021	0.794567	0.9813
LPE(18:2)_[M-H]1-	-ve	0.894571	0.0376741	-2.65	0.008	0.823696	0.971544	0.886158	0.0390388	-2.74	0.006	0.812853	0.966073
LPE(20:0)_[M-H]1-	-ve	1.01849	0.0644069	0.29	0.772	0.899765	1.15288	1.03011	0.067189	0.45	0.649	0.906491	1.17058
LPE(20:1)_[M-H]1-	-ve	0.910664	0.0470984	-1.81	0.07	0.822878	1.00782	0.931959	0.0455071	-1.44	0.149	0.846902	1.02556
LPE(20:2)_[M-H]1-	-ve	0.909726	0.0449116	-1.92	0.055	0.825826	1.00215	0.899485	0.0456461	-2.09	0.037	0.814325	0.99355
LPE(20:3)_[M-H]1-	-ve	0.985041	0.0224542	-0.66	0.508	0.942	1.03005	0.991077	0.0231852	-0.38	0.702	0.946661	1.03758
LPE(20:4)_[M-H]1-	-ve	0.919873	0.0453863	-1.69	0.091	0.835083	1.01327	0.902752	0.0464589	-1.99	0.047	0.816136	0.99856
LPE(22:6)_[M-H]1-	-ve	0.932836	0.0444526	-1.46	0.145	0.849656	1.02416	0.924384	0.0471304	-1.54	0.123	0.836476	1.02153
LPS(20:0)_[M-H]1- & LPC(16:1)_[M+OAc]1-	-ve	0.954096	0.026215	-1.71	0.087	0.904074	1.00689	0.961586	0.0270243	-1.39	0.163	0.910052	1.01604
LPS(22:1)_[M-H]1- & LPC(18:2)_[M+OAc]1- & PIP(52:6)	-ve	0.880711	0.0482827	-2.32	0.021	0.790986	0.980615	0.879122	0.0492914	-2.3	0.022	0.787632	0.98124
LPS(26:1) & LPC(22:2)_[M+OAc]1-	-ve	0.999814	0.0274292	-0.01	0.995	0.947474	1.05505	1.00105	0.0283724	0.04	0.971	0.946954	1.05823
PA(40:1)	-ve	0.978425	0.028489	-0.75	0.454	0.924151	1.03589	0.992187	0.0291277	-0.27	0.789	0.936709	1.05095
PA(44:10)	-ve	1.01421	0.0360463	0.4	0.691	0.945962	1.08737	1.0275	0.0385903	0.72	0.47	0.954585	1.10599
PA(46:9)	-ve	1.03348	0.0281653	1.21	0.227	0.979726	1.09018	1.0087	0.0290235	0.3	0.763	0.953391	1.06722
PA-P(38:1)	-ve	1.0033	0.0386089	0.09	0.932	0.930416	1.0819	0.99048	0.0440232	-0.22	0.83	0.907848	1.08063
PC(22:1)_[M+Cl]1-	-ve	0.987409	0.0236914	-0.53	0.597	0.94205	1.03495	0.986521	0.0244371	-0.55	0.584	0.93977	1.0356
PC(22:2)_[M+OAc]1- & PS(26:1)	-ve	1.01433	0.0213737	0.68	0.5	0.97329	1.0571	1.0118	0.022184	0.54	0.593	0.96924	1.05623
PC(24:3)_[M+OAc]1- & PS(28:2)	-ve	1.01859	0.0182042	1.03	0.303	0.983526	1.0549	1.01954	0.0191948	1.03	0.304	0.982609	1.05787
PC(26:0)_[M+OAc]1- & PS(30:1)	-ve	0.992004	0.0345301	-0.23	0.818	0.926584	1.06204	0.987805	0.0353827	-0.34	0.732	0.920835	1.05965
PC(28:2)_[M+OAc]1- & PS(32:1)	-ve	0.984099	0.0221511	-0.71	0.476	0.941627	1.02849	0.982879	0.0229904	-0.74	0.46	0.938836	1.02899
PC(28:3)_[M+OAc]1- & PS(32:2)	-ve	0.998628	0.0211559	-0.06	0.948	0.958012	1.04096	1.00169	0.0222915	0.08	0.94	0.958936	1.04634
PC(31:0)_[M+OAc]1-	-ve	1.15047	0.0980383	1.64	0.1	0.973512	1.3596	1.13795	0.100461	1.46	0.143	0.957147	1.35292
PC(31:1)_[M+OAc]1- & PS(35:0)_[M-H]1-	-ve	1.01045	0.0494196	0.21	0.832	0.918089	1.11211	0.992382	0.0493449	-0.15	0.878	0.900231	1.09397
PC(32:0)_[M+OAc]1-	-ve	1.07275	0.113658	0.66	0.507	0.871589	1.32033	1.01103	0.11043	0.1	0.92	0.816186	1.25238
PC(32:1) & PE(35:1)	+ve	1.05042	0.0446214	1.16	0.247	0.966502	1.14162	1.08163	0.0503955	1.68	0.092	0.987237	1.18506
PC(32:1)_[M+OAc]1- & PS(36:0)	-ve	1.16322	0.0828742	2.12	0.034	1.01162	1.33754	1.18044	0.0874723	2.24	0.025	1.02087	1.36496
PC(32:1)_[M+OAc]1- & PS(36:0)_[M-H]1-	-ve	1.10294	0.0794607	1.36	0.174	0.957699	1.27022	1.1332	0.0856789	1.65	0.098	0.97712	1.31421
PC(32:2)_[M+OAc]1- & PS(36:1)	-ve	1.1344	0.0770475	1.86	0.063	0.993006	1.29592	1.14868	0.0801219	1.99	0.047	1.0019	1.31696
PC(32:3)_[M+OAc]1- & PS(36:2)	-ve	1.01868	0.0122027	1.54	0.122	0.995041	1.04288	1.0286	0.0137064	2.12	0.034	1.00209	1.05582
PC(33:0) & PE(36:0)	+ve	1.01187	0.0168041	0.71	0.477	0.979462	1.04534	1.00812	0.0174582	0.47	0.64	0.97448	1.04293
PC(33:1)_[M+OAc]1- & PS(37:0)_[M-H]1-	-ve	0.852928	0.0783098	-1.73	0.083	0.712461	1.02109	0.886228	0.0831303	-1.29	0.198	0.737396	1.0651
PC(33:2) & PE(36:2)	+ve	0.936729	0.0424743	-1.44	0.149	0.857073	1.02379	0.914819	0.0439881	-1.85	0.064	0.832542	1.00523
PC(33:2)_[M+Cl]1- & PG(P-16:0&22:6)	-ve	1.03355	0.0381522	0.89	0.371	0.961418	1.1111	1.04055	0.0413138	1	0.317	0.962649	1.12476
PC(33:2)_[M+OAc]1- & PS(37:1)_[M-H]1-	-ve	0.877935	0.079672	-1.43	0.151	0.73488	1.04884	0.856672	0.0814856	-1.63	0.104	0.710967	1.03224
PC(33:3)_[M+OAc]1- & PS(37:2)_[M-H]1-	-ve	0.953633	0.0620445	-0.73	0.466	0.839463	1.08333	0.986491	0.0678926	-0.2	0.843	0.862008	1.12895
PC(33:4)_[M+OAc]1- & PS(37:3)_[M-H]1-	-ve	0.979682	0.02372	-0.85	0.397	0.934277	1.02729	0.982614	0.0238756	-0.72	0.47	0.936916	1.03054
PC(34:1) & PE(37:1)	+ve	0.936504	0.0559239	-1.1	0.272	0.833067	1.05279	0.953703	0.0593642	-0.76	0.446	0.844169	1.07745
PC(34:1)_[M+Cl]1-	-ve	1.02468	0.0510724	0.49	0.625	0.929318	1.12984	1.05185	0.0552945	0.96	0.336	0.948877	1.16601
PC(34:1)_[M+OAc]1- & PS(38:0)	-ve	1.00648	0.0972906	0.07	0.947	0.832764	1.21642	1.05737	0.107659	0.55	0.584	0.866081	1.2909
PC(34:2)	+ve	0.948202	0.055327	-0.91	0.362	0.845734	1.06309	0.910411	0.0554607	-1.54	0.123	0.807948	1.02587
PC(34:2)_[M+Cl]1-	-ve	1.0417	0.0544037	0.78	0.434	0.940344	1.15397	1.043	0.0576402	0.76	0.446	0.935932	1.16232
PC(34:2)_[M+OAc]1- & PS(38:1)_[M-H]1-	-ve	1.07051	0.109939	0.66	0.507	0.875331	1.3092	1.03121	0.10991	0.29	0.773	0.836799	1.27078
PC(34:3) & PE(37:3)	+ve	0.867415	0.0532493	-2.32	0.021	0.769083	0.97832	0.894854	0.0572682	-1.74	0.083	0.789364	1.01444
PC(34:3)_[M+OAc]1- & PS(38:2)	-ve	0.938609	0.0957476	-0.62	0.535	0.768517	1.14635	1.00283	0.108383	0.03	0.979	0.811396	1.23943
PC(35:0)_[M+OAc]1-	-ve	0.996623	0.0220555	-0.15	0.879	0.954319	1.0408	1.00336	0.0207746	0.16	0.871	0.963454	1.04491
PC(35:1)_[M+OAc]1- & PS(39:0)_[M-H]1-	-ve	0.79293	0.0778071	-2.36	0.018	0.654199	0.961081	0.832219	0.0850605	-1.8	0.072	0.681141	1.01681
PC(35:2)	+ve	0.875864	0.0411652	-2.82	0.005	0.798786	0.96038	0.852141	0.0425379	-3.21	0.001	0.772717	0.939728
PC(35:2)_[M+OAc]1- & PS(39:1)_[M-H]1-	-ve	0.847899	0.0823554	-1.7	0.089	0.700919	1.0257	0.830487	0.0842336	-1.83	0.067	0.680767	1.01313
PC(35:3)_[M+OAc]1- & PS(39:2)_[M-H]1-	-ve	0.874825	0.0768577	-1.52	0.128	0.736443	1.03921	0.888179	0.0818183	-1.29	0.198	0.741461	1.06393
PC(35:4)_[M+OAc]1- & PS(39:3)_[M-H]1-	-ve	0.959339	0.0761744	-0.52	0.601	0.821078	1.12088	0.934492	0.0770157	-0.82	0.411	0.795104	1.09831
PC(35:5)_[M+OAc]1- & PS(39:4)_[M-H]1-	-ve	1.09221	0.0432504	2.23	0.026	1.01064	1.18035	1.06474	0.0446127	1.5	0.134	0.980792	1.15587
PC(36:1) & PE(39:1)	+ve	0.939754	0.0446014	-1.31	0.19	0.85628	1.03137	0.948763	0.0467292	-1.07	0.286	0.861458	1.04492
PC(36:1)_[M+OAc]1- & PS(40:0)	-ve	0.938235	0.0775695	-0.77	0.441	0.79788	1.10328	0.941681	0.0804921	-0.7	0.482	0.796427	1.11343
PC(36:2)_[M+Cl]1-	-ve	1.0205	0.0472836	0.44	0.661	0.931911	1.11751	1.02651	0.0504405	0.53	0.594	0.932255	1.13028
PC(36:2)_[M+OAc]1- & PS(40:1)	-ve	1.02129	0.0990497	0.22	0.828	0.844487	1.2351	1.00831	0.101645	0.08	0.935	0.827537	1.22858
PC(36:3) & PE(39:3)	+ve	0.957005	0.0508946	-0.83	0.409	0.862277	1.06214	0.95521	0.0532437	-0.82	0.411	0.856353	1.06548
PC(36:3)_[M+Cl]1-	-ve	1.03045	0.0484995	0.64	0.524	0.939647	1.13003	1.05017	0.0522296	0.98	0.325	0.952629	1.15769
PC(36:3)_[M+OAc]1- & PS(40:2)	-ve	1.02675	0.0939199	0.29	0.773	0.858231	1.22837	1.0503	0.102712	0.5	0.616	0.867102	1.27219
PC(36:4)	+ve	0.998121	0.0523373	-0.04	0.971	0.900637	1.10616	0.96072	0.0525184	-0.73	0.464	0.863108	1.06937
PC(36:4)_[M+Cl]1-	-ve	1.05408	0.0515703	1.08	0.282	0.957699	1.16016	1.0474	0.0537244	0.9	0.367	0.947227	1.15818
PC(36:4)_[M+OAc]1- & PS(40:3)	-ve	1.11781	0.103179	1.21	0.228	0.932822	1.33949	1.06804	0.101854	0.69	0.49	0.885954	1.28754
PC(36:5) & PE(39:5)	+ve	0.989011	0.0321942	-0.34	0.734	0.927882	1.05417	0.970742	0.0333583	-0.86	0.388	0.907514	1.03838
PC(36:5)_[M+Cl]1-	-ve	1.05713	0.0165278	3.55	0	1.02523	1.09003	1.04673	0.0174581	2.74	0.006	1.01307	1.08152
PC(36:5)_[M+OAc]1- & PS(40:4)	-ve	1.08696	0.038942	2.33	0.02	1.01325	1.16603	1.06349	0.0402963	1.62	0.104	0.987368	1.14547
PC(36:6)_[M+OAc]1- & PS(40:5)	-ve	0.835067	0.0540256	-2.79	0.005	0.735618	0.947962	0.860075	0.0569648	-2.28	0.023	0.755369	0.979295
PC(36:7) & PS(40:6)	-ve	0.86879	0.0715792	-1.71	0.088	0.739239	1.02104	0.857324	0.0739092	-1.79	0.074	0.724042	1.01514
PC(36:7)_[M+OAc]1- & PS(40:6)_[M-H]1-	-ve	0.861509	0.0711195	-1.81	0.071	0.73281	1.01281	0.852766	0.0736304	-1.84	0.065	0.720003	1.01001
PC(37:1)_[M+Cl]1-	-ve	1.00778	0.0202873	0.39	0.7	0.968796	1.04834	1.00103	0.0212353	0.05	0.961	0.960258	1.04352
PC(37:2)_[M+OAc]1- & PS(41:1)_[M-H]1-	-ve	1.10046	0.0911883	1.16	0.248	0.935492	1.29452	1.09481	0.0942499	1.05	0.293	0.92483	1.29604
PC(37:3)_[M+OAc]1- & PS(41:2)_[M-H]1-	-ve	0.986899	0.0800541	-0.16	0.871	0.841833	1.15696	1.01363	0.0869373	0.16	0.875	0.856792	1.19919
PC(37:4)	+ve	0.948545	0.031611	-1.59	0.113	0.888569	1.01257	0.940431	0.0325735	-1.77	0.076	0.878707	1.00649
PC(37:4)_[M+OAc]1- & PS(41:3)_[M-H]1-	-ve	0.917573	0.0811721	-0.97	0.331	0.771508	1.09129	0.880281	0.080731	-1.39	0.164	0.735457	1.05362
PC(37:5)_[M+OAc]1- & PS(41:4)_[M-H]1-	-ve	0.945568	0.0780066	-0.68	0.497	0.804398	1.11151	0.919577	0.07923	-0.97	0.331	0.776693	1.08875
PC(37:6) & PE(40:6)	+ve	1.00391	0.0281449	0.14	0.889	0.950232	1.06061	0.9873	0.0292842	-0.43	0.667	0.93154	1.0464
PC(37:7)_[M+OAc]1- & PS(41:6)_[M-H]1-	-ve	1.00372	0.0239253	0.16	0.876	0.957902	1.05172	1.00441	0.0247366	0.18	0.858	0.957076	1.05408
PC(38:1) & PE(41:1)	+ve	1.00946	0.0071177	1.33	0.182	0.995602	1.0235	1.01127	0.0074442	1.52	0.128	0.996785	1.02597
PC(38:1)_[M+OAc]1- & PS(42:0)_[M-H]1-	-ve	1.1483	0.0556218	2.85	0.004	1.0443	1.26266	1.16961	0.0607376	3.02	0.003	1.05642	1.29492
PC(38:2)_[M+OAc]1- & PS(42:1)_[M-H]1-	-ve	0.974271	0.0875955	-0.29	0.772	0.816864	1.16201	0.950612	0.0895942	-0.54	0.591	0.790275	1.14348
PC(38:3) & PE(41:3)	+ve	1.04255	0.042188	1.03	0.303	0.963056	1.1286	1.04765	0.0447839	1.09	0.276	0.963449	1.1392
PC(38:3)_[M+OAc]1- & PS(42:2)_[M-H]1-	-ve	1.14868	0.0846805	1.88	0.06	0.994142	1.32724	1.18595	0.0939927	2.15	0.031	1.01532	1.38525
PC(38:4)_[M+OAc]1- & PS(42:3)_[M-H]1-	-ve	1.11952	0.0979051	1.29	0.197	0.943173	1.32884	1.07665	0.0971876	0.82	0.413	0.902066	1.28503
PC(38:5) & PE(41:5)	+ve	0.94748	0.0559589	-0.91	0.361	0.843912	1.06376	0.903653	0.0558588	-1.64	0.101	0.800544	1.02004
PC(38:5)_[M+Cl]1-	-ve	1.08985	0.0315112	2.98	0.003	1.0298	1.15339	1.09533	0.0313977	3.18	0.001	1.03549	1.15863
PC(38:5)_[M+OAc]1- & PS(42:4)_[M-H]1-	-ve	1.09029	0.0951369	0.99	0.322	0.9189	1.29365	1.05491	0.0961338	0.59	0.557	0.88236	1.2612
PC(38:6)	+ve	0.947286	0.0555784	-0.92	0.356	0.844384	1.06273	0.892836	0.0573364	-1.77	0.078	0.787243	1.01259
PC(38:7)	+ve	0.968163	0.0295182	-1.06	0.289	0.912003	1.02778	0.948326	0.0307406	-1.64	0.102	0.889949	1.01053
PC(38:7)_[M+OAc]1- & PS(42:6)_[M-H]1-	-ve	0.848055	0.0712215	-1.96	0.05	0.719346	0.999792	0.832262	0.0724405	-2.11	0.035	0.701732	0.987073
PC(39:1)_[M+Cl]1-	-ve	1.04239	0.0218221	1.98	0.047	1.00048	1.08605	1.04283	0.0224015	1.95	0.051	0.999833	1.08767
PC(39:2)_[M+Cl]1-	-ve	1.01751	0.0241107	0.73	0.464	0.971337	1.06588	1.02165	0.0247554	0.88	0.377	0.974264	1.07134
PC(39:2)_[M+OAc]1- & PS(43:1)_[M-H]1-	-ve	1.00269	0.050115	0.05	0.957	0.909122	1.10588	0.990571	0.0520173	-0.18	0.857	0.89369	1.09795
PC(39:3)_[M+OAc]1- & PS(43:2)_[M-H]1-	-ve	1.01291	0.0291794	0.45	0.656	0.9573	1.07174	1.0265	0.0305073	0.88	0.379	0.968414	1.08807
PC(39:6)_[M+OAc]1- & PS(43:5)	-ve	0.944625	0.0933214	-0.58	0.564	0.778337	1.14644	0.88123	0.0943506	-1.18	0.238	0.71442	1.08699
PC(40:1)_[M+OAc]1- & PS(44:0)_[M-H]1-	-ve	0.941681	0.0443827	-1.27	0.202	0.85859	1.03281	0.951141	0.0457204	-1.04	0.297	0.865622	1.04511
PC(40:10) & PS(44:9)	-ve	0.842572	0.0454354	-3.18	0.001	0.758065	0.9365	0.845227	0.0466213	-3.05	0.002	0.758617	0.941725
PC(40:2)_[M+OAc]1- & PS(44:1)_[M-H]1-	-ve	1.05495	0.0785946	0.72	0.473	0.911628	1.22081	1.05384	0.0818323	0.68	0.499	0.905064	1.22708
PC(40:3)_[M+OAc]1- & PS(44:2)_[M-H]1-	-ve	0.99379	0.0165449	-0.37	0.708	0.961886	1.02675	0.998275	0.0165464	-0.1	0.917	0.966366	1.03124
PC(40:4)_[M+OAc]1- & PS(44:3)_[M-H]1-	-ve	1.13911	0.0775139	1.91	0.056	0.996877	1.30163	1.13352	0.0798879	1.78	0.075	0.987273	1.30142
PC(40:5) & PE(43:5)	+ve	0.974897	0.0455073	-0.54	0.586	0.889662	1.0683	0.959656	0.0464115	-0.85	0.395	0.87287	1.05507
PC(40:6)_[M+Cl]1-	-ve	1.05628	0.0225554	2.56	0.01	1.01299	1.10143	1.05477	0.0238836	2.35	0.019	1.00898	1.10264
PC(40:6)_[M+OAc]1- & PS(44:5)_[M-H]1-	-ve	1.23155	0.101458	2.53	0.011	1.04792	1.44736	1.1602	0.102493	1.68	0.093	0.975752	1.37953
PC(40:7)	+ve	0.89653	0.031832	-3.08	0.002	0.836262	0.961142	0.892672	0.0326329	-3.11	0.002	0.83095	0.958978
PC(40:8)_[M+OAc]1- & PS(44:7)_[M-H]1-	-ve	0.934721	0.0614204	-1.03	0.304	0.821769	1.0632	0.963556	0.0680397	-0.53	0.599	0.839017	1.10658
PC(40:9)_[M+OAc]1- & PS(44:8)_[M-H]1-	-ve	0.945366	0.0702342	-0.76	0.45	0.817263	1.09355	0.945121	0.0728652	-0.73	0.464	0.812575	1.09929
PC(41:1)_[M+OAc]1- & PS(45:0)	-ve	0.944968	0.0385581	-1.39	0.165	0.872338	1.02364	0.959234	0.033402	-1.2	0.232	0.895951	1.02699
PC(41:2)_[M+OAc]1- & PS(45:1)	-ve	1.09625	0.0835509	1.21	0.228	0.944139	1.27287	1.06631	0.0844255	0.81	0.417	0.913039	1.24531
PC(41:6)_[M+OAc]1-	-ve	0.991216	0.0668816	-0.13	0.896	0.868428	1.13136	0.986379	0.0693685	-0.2	0.845	0.859374	1.13216
PC(41:7)_[M+OAc]1- & PS(45:6)	-ve	0.933288	0.0444098	-1.45	0.147	0.850182	1.02452	0.945187	0.0464143	-1.15	0.251	0.858457	1.04068
PC(42:1)_[M+OAc]1- & PS(46:0)	-ve	1.01332	0.0426642	0.31	0.753	0.933061	1.10049	1.04341	0.0459608	0.96	0.335	0.957105	1.13749
PC(42:11)	+ve	0.967133	0.0168499	-1.92	0.055	0.934666	1.00073	0.969698	0.0175532	-1.7	0.089	0.935897	1.00472
PC(42:11)_[M+OAc]1- & PS(46:10)	-ve	0.901398	0.0520707	-1.8	0.072	0.804906	1.00946	0.900373	0.0538861	-1.75	0.08	0.800717	1.01243
PC(42:2)_[M+OAc]1- & PS(46:1)	-ve	1.07295	0.0860618	0.88	0.38	0.916862	1.25561	1.06221	0.0886575	0.72	0.47	0.901918	1.251
PC(42:3)_[M+OAc]1- & PS(46:2)	-ve	1.04859	0.0527068	0.94	0.345	0.950213	1.15715	1.0603	0.0551689	1.13	0.26	0.957501	1.17413
PC(42:4)_[M+OAc]1- & PS(46:3)	-ve	1.05635	0.0675805	0.86	0.392	0.931862	1.19747	1.0309	0.0693976	0.45	0.651	0.903479	1.1763
PC(42:6) & PS(46:5)	-ve	0.960408	0.030747	-1.26	0.207	0.901997	1.0226	0.989043	0.0315288	-0.35	0.73	0.929139	1.05281
PC(42:6)_[M+OAc]1-	-ve	0.96195	0.0306528	-1.22	0.223	0.903709	1.02394	0.990952	0.031402	-0.29	0.774	0.931277	1.05445
PC(42:9)	+ve	1.00127	0.0216957	0.06	0.953	0.959641	1.04471	0.9896	0.0229112	-0.45	0.652	0.945698	1.03554
PC(43:2)_[M+OAc]1- & PS(47:1)	-ve	0.933565	0.0667848	-0.96	0.337	0.811432	1.07408	0.952871	0.0712424	-0.65	0.518	0.822987	1.10325
PC(43:4)_[M+OAc]1- & PS(47:3)	-ve	1.03004	0.0376049	0.81	0.418	0.958911	1.10644	1.01835	0.0386616	0.48	0.632	0.945327	1.09702
PC(44:0)_[M+OAc]1-	-ve	1.03905	0.0431431	0.92	0.356	0.957836	1.12714	1.06898	0.0474875	1.5	0.133	0.979842	1.16623
PC(44:1)_[M+OAc]1- & PS(48:0)	-ve	0.952151	0.0419775	-1.11	0.266	0.873331	1.03808	0.972843	0.0432358	-0.62	0.536	0.891688	1.06138
PC(44:2)_[M+OAc]1- & PS(48:1)	-ve	0.930471	0.0542486	-1.24	0.216	0.829996	1.04311	0.937371	0.0564771	-1.07	0.283	0.832964	1.05486
PC(44:3)_[M+OAc]1- & PS(48:2)	-ve	1.10288	0.0693965	1.56	0.12	0.974917	1.24764	1.1316	0.0748125	1.87	0.061	0.994071	1.28815
PC(44:4)_[M+OAc]1- & PS(48:3)	-ve	1.10068	0.0701832	1.5	0.132	0.971372	1.2472	1.08947	0.0729513	1.28	0.201	0.955473	1.24226
PC(46:1)_[M+OAc]1- & PS(50:0)	-ve	0.999411	0.039034	-0.02	0.988	0.925761	1.07892	0.998875	0.0382912	-0.03	0.977	0.926575	1.07682
PC(46:2)_[M+OAc]1- & PS(50:1)	-ve	0.890648	0.0555058	-1.86	0.063	0.78824	1.00636	0.896719	0.0573054	-1.71	0.088	0.791152	1.01637
PC(46:3) & PS(50:2)	-ve	0.960292	0.0387879	-1	0.316	0.8872	1.0394	0.974649	0.0403472	-0.62	0.535	0.898694	1.05703
PC(46:4) & PS(50:3)	-ve	0.922672	0.0446521	-1.66	0.096	0.839178	1.01447	0.925876	0.0470815	-1.51	0.13	0.838047	1.02291
PC(46:6) & PS(50:5)	-ve	0.984591	0.0239645	-0.64	0.523	0.938724	1.0327	0.981923	0.0288601	-0.62	0.535	0.926956	1.04015
PC(48:1) & PS(52:0)	-ve	0.909503	0.0635466	-1.36	0.175	0.793106	1.04298	0.931119	0.068285	-0.97	0.33	0.806457	1.07505
PC(48:1)_[M+OAc]1- & PS(52:1)	-ve	0.935825	0.0717828	-0.86	0.387	0.805198	1.08764	0.912904	0.0736156	-1.13	0.258	0.779444	1.06922
PC(48:3) & PS(52:2)	-ve	0.992299	0.056333	-0.14	0.892	0.887809	1.10909	1.01065	0.0607657	0.18	0.86	0.898301	1.13705
PC(48:4) & PS(52:3)	-ve	0.925578	0.0416572	-1.72	0.086	0.847428	1.01093	0.92365	0.0433863	-1.69	0.091	0.842411	1.01272
PC(48:5) & PS(52:4)	-ve	0.985749	0.0334121	-0.42	0.672	0.92239	1.05346	0.992498	0.035853	-0.21	0.835	0.924657	1.06532
PC(48:6) & PS(52:5)	-ve	0.985179	0.0359355	-0.41	0.682	0.917206	1.05819	0.984725	0.0376715	-0.4	0.687	0.913591	1.0614
PC(50:0)_[M+OAc]1-	-ve	1.04123	0.0405947	1.04	0.3	0.964633	1.12392	1.05096	0.0423548	1.23	0.217	0.971142	1.13734
PC(52:4)_[M+OAc]1-	-ve	0.941723	0.0646622	-0.87	0.382	0.823145	1.07738	0.916449	0.065491	-1.22	0.222	0.796673	1.05423
PC-O(16:0)_[M+Cl]1-	-ve	1.0211	0.0163938	1.3	0.193	0.989474	1.05375	1.0223	0.0167308	1.35	0.178	0.990027	1.05562
PC-O(16:0)_[M+OAc]1- & PIP(48:2)	-ve	0.866384	0.0651318	-1.91	0.056	0.747687	1.00392	0.8836	0.0678838	-1.61	0.107	0.760083	1.02719
PC-O(17:0)_[M+OAc]1- & PIP(50:2)	-ve	0.941219	0.0365189	-1.56	0.118	0.872297	1.01559	0.948302	0.0370787	-1.36	0.175	0.878344	1.02383
PC-O(18:0)_[M+OAc]1- & PIP(52:2)	-ve	0.960662	0.0631377	-0.61	0.541	0.844554	1.09273	0.971399	0.0656297	-0.43	0.668	0.85092	1.10894
PC-O(18:1)_[M+OAc]1- & LPS(22:0)_[M-H]1- & PIP(52:4)	-ve	0.818836	0.0494011	-3.31	0.001	0.727517	0.921617	0.850853	0.0528017	-2.6	0.009	0.75341	0.9609
PC-O(29:0)_[M+OAc]1-	-ve	1.00956	0.0199172	0.48	0.63	0.971264	1.04936	1.00413	0.0207491	0.2	0.842	0.964274	1.04563
PC-O(32:0)	+ve	0.959362	0.0377578	-1.05	0.292	0.88814	1.03629	0.966939	0.0403491	-0.81	0.42	0.891004	1.04935
PC-O(32:0)_[M+OAc]1-	-ve	0.837099	0.0673876	-2.21	0.027	0.714915	0.980166	0.865107	0.0721876	-1.74	0.082	0.734586	1.01882
PC-O(32:1) & PC-P(32:0)	+ve	0.972971	0.0339708	-0.78	0.433	0.908616	1.04188	0.979548	0.0341656	-0.59	0.554	0.914823	1.04885
PC-O(32:1)_[M+OAc]1- & PS-O(36:0)_[M-H]1-	-ve	0.996149	0.0667648	-0.06	0.954	0.873523	1.13599	1.0147	0.0703459	0.21	0.833	0.885784	1.16238
PC-O(34:0)_[M+OAc]1-	-ve	0.958737	0.0298309	-1.35	0.176	0.902016	1.01902	0.964862	0.0295245	-1.17	0.242	0.908696	1.0245
PC-O(34:1) & PC-P(34:0)	+ve	0.840639	0.0437036	-3.34	0.001	0.759201	0.930812	0.856415	0.0454447	-2.92	0.003	0.77182	0.950281
PC-O(34:1)_[M+OAc]1- & PS-O(38:0)_[M-H]1-	-ve	0.875569	0.0797542	-1.46	0.145	0.732412	1.04671	0.927168	0.0874859	-0.8	0.423	0.77062	1.11552
PC-O(34:2)_[M+OAc]1- & PS-O(38:1)_[M-H]1-	-ve	0.882342	0.0626122	-1.76	0.078	0.767776	1.014	0.889689	0.0662298	-1.57	0.116	0.768906	1.02944
PC-O(34:3)_[M+OAc]1- & PS-O(38:2)_[M-H]1-	-ve	0.983015	0.03852	-0.44	0.662	0.910344	1.06149	0.973141	0.0450533	-0.59	0.556	0.888726	1.06557
PC-O(35:0)_[M+OAc]1-	-ve	0.994283	0.0119799	-0.48	0.634	0.971078	1.01804	0.995142	0.0122429	-0.4	0.692	0.971433	1.01943
PC-O(35:4)_[M+OAc]1-	-ve	0.963421	0.0394444	-0.91	0.363	0.889132	1.04392	0.972923	0.0410773	-0.65	0.516	0.895654	1.05686
PC-O(36:3)_[M+OAc]1- & PS-O(40:2)_[M-H]1-	-ve	0.907469	0.0499316	-1.76	0.078	0.814697	1.0108	0.907013	0.0523281	-1.69	0.091	0.810038	1.0156
PC-O(36:4)_[M+OAc]1- & PS-O(40:3)_[M-H]1-	-ve	0.931055	0.0841984	-0.79	0.43	0.779827	1.11161	0.926516	0.0863387	-0.82	0.413	0.771849	1.11217
PC-O(36:5) & PC-P(36:4)	+ve	0.944765	0.0278268	-1.93	0.054	0.89177	1.00091	0.925675	0.0293929	-2.43	0.015	0.869822	0.985115
PC-O(36:5)_[M+OAc]1- & PS-O(40:4)_[M-H]1-	-ve	1.05645	0.0642498	0.9	0.367	0.937737	1.19019	1.02759	0.0664163	0.42	0.674	0.90532	1.16636
PC-O(37:2)_[M+Cl]1-	-ve	1.06553	0.107681	0.63	0.53	0.874063	1.29893	1.11687	0.11889	1.04	0.299	0.906554	1.37598
PC-O(38:1)_[M+Cl]1-	-ve	0.998711	0.0150677	-0.09	0.932	0.969611	1.02868	0.997927	0.0153534	-0.13	0.893	0.968284	1.02848
PC-O(38:2)_[M+Cl]1-	-ve	0.959861	0.0395787	-0.99	0.32	0.885339	1.04065	0.969767	0.0395465	-0.75	0.452	0.895274	1.05046
PC-O(38:4)_[M+OAc]1- & PS-P_42:0)_[M-H]1-	-ve	0.968816	0.0445171	-0.69	0.491	0.885378	1.06012	0.972555	0.0437353	-0.62	0.536	0.890505	1.06217
PC-O(38:5)_[M+OAc]1- & PS-O(42:4)_[M-H]1-	-ve	0.871137	0.0832219	-1.44	0.149	0.722386	1.05052	0.873465	0.086513	-1.37	0.172	0.719345	1.0606
PC-O(38:6)_[M+OAc]1- & PS-P_42:1)_[M-H]1-	-ve	1.12237	0.0626127	2.07	0.039	1.00612	1.25205	1.11168	0.0655053	1.8	0.072	0.990432	1.24778
PC-O(40:5)	+ve	0.931137	0.0303058	-2.19	0.028	0.873593	0.992471	0.941449	0.0304399	-1.87	0.062	0.883639	1.00304
PC-O(40:6)_[M+OAc]1-	-ve	1.02585	0.0481034	0.54	0.586	0.935767	1.1246	1.05402	0.052122	1.06	0.287	0.956653	1.16129
PC-O(40:9) & PC-P(40:8)	+ve	0.990172	0.013643	-0.72	0.473	0.96379	1.01728	0.982263	0.0144733	-1.21	0.225	0.954302	1.01104
PC-O(42:5) & PC-P(42:4)	+ve	0.992662	0.0197768	-0.37	0.712	0.954647	1.03219	1.0088	0.0200197	0.44	0.659	0.97032	1.04882
PC-O(44:5) & PC-P(44:4)	+ve	0.976157	0.0222789	-1.06	0.29	0.933453	1.02081	0.987529	0.0226543	-0.55	0.584	0.944111	1.03294
PC-O(46:7) & PC-P(46:6)	+ve	0.995632	0.0198936	-0.22	0.827	0.957395	1.0354	0.99754	0.0203956	-0.12	0.904	0.958356	1.03833
PC-P(34:1) & PC-O(34:2)	+ve	0.899957	0.0389785	-2.43	0.015	0.826714	0.97969	0.902873	0.0403716	-2.29	0.022	0.827114	0.98557
PC-P(36:1) & PC-O(36:2)	+ve	0.96987	0.0243668	-1.22	0.223	0.923269	1.01882	0.982738	0.0253575	-0.67	0.5	0.934274	1.03372
PC-P(36:3) & PC-O(36:4)	+ve	0.894026	0.0447925	-2.24	0.025	0.810407	0.986273	0.883876	0.0453527	-2.41	0.016	0.79931	0.977389
PC-P(38:3) & PC-O(38:4)	+ve	0.886121	0.0416378	-2.57	0.01	0.808158	0.971606	0.904967	0.0433777	-2.08	0.037	0.82382	0.994108
PC-P(38:7) & PC-O(38:8)	+ve	0.979576	0.0117377	-1.72	0.085	0.956839	1.00285	0.976588	0.0124727	-1.85	0.064	0.952446	1.00134
PC-P(40:3)	+ve	0.892655	0.0271067	-3.74	0	0.841077	0.947396	0.908637	0.0281274	-3.1	0.002	0.855148	0.965473
PC-P(42:3) & PC-O(42:4)	+ve	0.989634	0.0187012	-0.55	0.581	0.953651	1.02697	0.999471	0.0187666	-0.03	0.978	0.963358	1.03694
PC-P_28:0)_[M+OAc]1- & PS-O(32:0)_[M-H]1-	-ve	0.932307	0.0318626	-2.05	0.04	0.871903	0.996896	0.952573	0.0328303	-1.41	0.159	0.890352	1.01914
PC-P_33:2)_[M+OAc]1- & PS-O(37:2)_[M-H]1-	-ve	0.989279	0.0158243	-0.67	0.5	0.958745	1.02079	0.991444	0.0167284	-0.51	0.611	0.959193	1.02478
PC-P_34:4)_[M+OAc]1- & PS-O(38:4)_[M-H]1-	-ve	1.03256	0.0471219	0.7	0.483	0.944218	1.12918	1.0572	0.0501514	1.17	0.241	0.963332	1.1602
PC-P_35:2)_[M+OAc]1- & PS-P_39:1)_[M-H]1-	-ve	1.00084	0.0109652	0.08	0.939	0.979575	1.02256	1.0046	0.0113879	0.4	0.686	0.982524	1.02717
PC-P_36:5)_[M+OAc]1- & PS-O(40:5)_[M-H]1-	-ve	1.03553	0.041171	0.88	0.38	0.9579	1.11945	1.04054	0.0428457	0.97	0.334	0.959863	1.128
PC-P_39:1)_[M+Cl]1-	-ve	1.02774	0.0431009	0.65	0.514	0.946646	1.11579	1.05222	0.0455893	1.17	0.24	0.96656	1.14548
PC-P_40:6)_[M+OAc]1-	-ve	1.07222	0.0410232	1.82	0.068	0.994758	1.15572	1.07714	0.0428654	1.87	0.062	0.996321	1.16452
PC-P_42:4)_[M+OAc]1-	-ve	0.918048	0.046544	-1.69	0.092	0.831209	1.01396	0.936397	0.0485236	-1.27	0.205	0.845963	1.0365
PC-P_42:6)_[M+OAc]1-	-ve	0.993189	0.0302727	-0.22	0.823	0.935593	1.05433	0.98504	0.0308949	-0.48	0.631	0.926311	1.04749
PE(34:0) & PC(31:0)	+ve	0.992347	0.0124175	-0.61	0.539	0.968305	1.01699	0.992873	0.0127848	-0.56	0.579	0.968129	1.01825
PE(34:0)_[M-H]1-	-ve	1.21496	0.0696872	3.39	0.001	1.08577	1.35952	1.17492	0.0693288	2.73	0.006	1.04661	1.31898
PE(34:1) & PC(31:1)	+ve	1.09837	0.048259	2.14	0.033	1.00774	1.19715	1.10083	0.0509633	2.08	0.038	1.00534	1.20539
PE(34:1)_[M-H]1-	-ve	1.04335	0.102941	0.43	0.667	0.859897	1.26594	1.07822	0.111584	0.73	0.467	0.88027	1.32068
PE(35:0) & PC(32:0)	+ve	0.956801	0.0530616	-0.8	0.426	0.858255	1.06666	0.913364	0.052638	-1.57	0.116	0.815809	1.02259
PE(35:1)_[M-H]1-	-ve	1.04458	0.0365073	1.25	0.212	0.97542	1.11864	1.06547	0.0389025	1.74	0.082	0.991887	1.14451
PE(35:2) & PC(32:2)	+ve	0.973488	0.0505283	-0.52	0.605	0.879326	1.07774	0.992023	0.0539744	-0.15	0.883	0.891681	1.10366
PE(35:2)_[M-H]1-	-ve	0.981959	0.0280343	-0.64	0.524	0.928521	1.03847	0.976554	0.028884	-0.8	0.422	0.921553	1.03484
PE(36:1) & PC(33:1)	+ve	0.992993	0.0464007	-0.15	0.88	0.906089	1.08823	1.02224	0.0514428	0.44	0.662	0.926225	1.1282
PE(36:1)_[M-H]1-	-ve	1.02694	0.10251	0.27	0.79	0.844456	1.24886	1.07182	0.1118	0.66	0.506	0.873642	1.31495
PE(36:2) & CL(74:4)	-ve	1.07233	0.113292	0.66	0.509	0.871761	1.31904	1.03991	0.114635	0.36	0.723	0.837849	1.29071
PE(36:3)_[M-H]1-	-ve	0.912265	0.096106	-0.87	0.383	0.742075	1.12149	0.923545	0.101144	-0.73	0.468	0.745139	1.14467
PE(37:1)_[M-H]1-	-ve	1.00075	0.0276448	0.03	0.978	0.948005	1.05642	1.01269	0.0286883	0.45	0.656	0.957994	1.07051
PE(37:2)_[M-H]1-	-ve	1.06407	0.0524852	1.26	0.208	0.96602	1.17208	1.06002	0.054918	1.13	0.261	0.957666	1.17331
PE(38:1) & PC(35:1)	+ve	0.945148	0.0433162	-1.23	0.218	0.863951	1.03398	0.954094	0.0461565	-0.97	0.331	0.867785	1.04899
PE(38:1)_[M-H]1-	-ve	0.982778	0.0488877	-0.35	0.727	0.891483	1.08342	0.988069	0.0513528	-0.23	0.817	0.892375	1.09402
PE(38:2)_[M-H]1-	-ve	0.987717	0.0973106	-0.13	0.9	0.814276	1.1981	0.990153	0.102077	-0.1	0.924	0.809003	1.21186
PE(38:3)_[M-H]1-	-ve	1.03373	0.0985809	0.35	0.728	0.8575	1.24618	1.05999	0.108531	0.57	0.569	0.867256	1.29555
PE(38:4)_[M-H]1-	-ve	1.18375	0.116644	1.71	0.087	0.975849	1.43593	1.11283	0.113617	1.05	0.295	0.911013	1.35936
PE(39:2) & PC(36:2)	+ve	0.931754	0.0494147	-1.33	0.183	0.839766	1.03382	0.910341	0.050299	-1.7	0.089	0.816907	1.01446
PE(39:6) & PC(36:6)	+ve	0.937543	0.0258927	-2.34	0.02	0.888143	0.98969	0.939957	0.0265231	-2.19	0.028	0.889385	0.993406
PE(40:3) & PC(37:3)	+ve	1.0004	0.0160009	0.03	0.98	0.96953	1.03226	0.999433	0.0166277	-0.03	0.973	0.967369	1.03256
PE(40:4)_[M-H]1-	-ve	1.07919	0.0400788	2.05	0.04	1.00342	1.16067	1.08247	0.0396822	2.16	0.031	1.00743	1.16311
PE(40:5) & PC(37:5)	+ve	1.00382	0.0248559	0.15	0.878	0.956263	1.05373	0.992141	0.0258175	-0.3	0.762	0.942808	1.04405
PE(40:6)_[M-H]1-	-ve	1.24072	0.119285	2.24	0.025	1.02763	1.49799	1.13703	0.11424	1.28	0.201	0.933788	1.3845
PE(40:7)_[M-H]1-	-ve	1.03278	0.0521608	0.64	0.523	0.935445	1.14025	1.03103	0.0539129	0.58	0.559	0.930597	1.1423
PE(41:4) & PC(38:4)	+ve	0.990712	0.0463472	-0.2	0.842	0.903914	1.08585	0.958144	0.0468943	-0.87	0.382	0.870504	1.05461
PE(41:5)_[M-H]1-	-ve	0.977341	0.0648946	-0.35	0.73	0.858079	1.11318	0.997353	0.0682106	-0.04	0.969	0.872236	1.14042
PE(43:4)	+ve	0.958835	0.0231138	-1.74	0.081	0.914586	1.00523	0.9582	0.023786	-1.72	0.085	0.912697	1.00597
PE(43:6) & PC(40:6)	+ve	1.08904	0.0521338	1.78	0.075	0.991505	1.19617	1.03319	0.0552572	0.61	0.542	0.930369	1.14737
PE-O(34:3)_[M-H]1-	-ve	1.02022	0.0446638	0.46	0.647	0.93633	1.11162	1.01423	0.0459317	0.31	0.755	0.92809	1.10838
PE-O(36:3)_[M-H]1-	-ve	1.02855	0.0643028	0.45	0.652	0.909936	1.16263	1.01386	0.0666485	0.21	0.834	0.891298	1.15328
PE-O(36:4)_[M-H]1-	-ve	1.04874	0.0439155	1.14	0.256	0.9661	1.13844	1.01998	0.045429	0.44	0.657	0.93472	1.11302
PE-O(36:5)_[M-H]1-	-ve	1.17764	0.0613039	3.14	0.002	1.06342	1.30414	1.15301	0.0647318	2.54	0.011	1.03287	1.28713
PE-O(38:4)_[M-H]1-	-ve	1.09187	0.0630179	1.52	0.128	0.975083	1.22264	1.06398	0.0645482	1.02	0.307	0.944703	1.19832
PE-O(38:5)_[M-H]1-	-ve	1.0941	0.0616706	1.6	0.111	0.979662	1.2219	1.05189	0.0659498	0.81	0.42	0.930254	1.18942
PE-P_40:6)_[M-H]1-	-ve	1.15657	0.0575219	2.92	0.003	1.04915	1.27499	1.14729	0.063787	2.47	0.013	1.02884	1.27938
PG(36:1) & TG(44:6)+Cl-37	-ve	1.01544	0.0414206	0.38	0.707	0.937419	1.09996	0.973658	0.0439459	-0.59	0.554	0.891226	1.06371
PG(36:2)	-ve	1.19326	0.0753952	2.8	0.005	1.05428	1.35058	1.16757	0.0788881	2.29	0.022	1.02275	1.33289
PG(46:9)	-ve	1.06047	0.0942283	0.66	0.509	0.890971	1.26221	1.05512	0.098635	0.57	0.566	0.878473	1.26728
PG(48:10)	-ve	1.14061	0.0776776	1.93	0.053	0.998093	1.30349	1.18086	0.0857173	2.29	0.022	1.02426	1.3614
PG(48:8)	-ve	1.00011	0.0143975	0.01	0.994	0.972286	1.02873	1.01094	0.0145034	0.76	0.448	0.982914	1.03977
PG(48:9)	-ve	1.04149	0.082066	0.52	0.606	0.892446	1.21542	1.06037	0.0869325	0.71	0.475	0.902965	1.2452
PG(O-20:0&16:0)	-ve	0.945133	0.0574397	-0.93	0.353	0.839	1.06469	0.918971	0.0587232	-1.32	0.186	0.810791	1.04158
PG(O-20:0&22:0)	-ve	1.02296	0.0154907	1.5	0.134	0.993045	1.05378	1.02771	0.0154767	1.82	0.069	0.997824	1.0585
PG(O-20:0&22:6)	-ve	1.0059	0.0198438	0.3	0.766	0.967749	1.04555	0.998759	0.0207869	-0.06	0.952	0.958838	1.04034
PG-O(36:0)_[M-H]1- & LPG(36:0)_[M]-	-ve	0.908885	0.0892606	-0.97	0.331	0.749745	1.1018	0.887908	0.0900588	-1.17	0.241	0.727834	1.08319
PG-O(40:0)_[M-H]1-	-ve	1.1106	0.0834926	1.4	0.163	0.95844	1.28691	1.11239	0.0859531	1.38	0.168	0.956063	1.29428
PG-O(41:0)_[M-H]1-	-ve	1.09062	0.0500529	1.89	0.059	0.9968	1.19327	1.09611	0.0523101	1.92	0.055	0.99823	1.20358
PG-O(42:0)_[M-H]1-	-ve	1.03061	0.0493309	0.63	0.529	0.938324	1.13198	1.06647	0.0520602	1.32	0.187	0.969162	1.17355
PI(32:0) & PA(45:10)	-ve	0.925167	0.0442135	-1.63	0.104	0.842445	1.01601	0.930614	0.0458003	-1.46	0.144	0.84504	1.02485
PI(34:1)	-ve	0.864953	0.0577942	-2.17	0.03	0.758783	0.98598	0.881084	0.0602295	-1.85	0.064	0.770602	1.0074
PI(34:2)	-ve	0.923967	0.0696266	-1.05	0.294	0.797101	1.07102	0.903096	0.0711987	-1.29	0.196	0.773796	1.054
PI(35:1)	-ve	0.936337	0.0343178	-1.79	0.073	0.871435	1.00607	0.937832	0.0355338	-1.69	0.09	0.87071	1.01013
PI(36:1)	-ve	0.78104	0.0669532	-2.88	0.004	0.660246	0.923934	0.811156	0.0722777	-2.35	0.019	0.681174	0.96594
PI(36:2)	-ve	0.859141	0.069471	-1.88	0.06	0.733222	1.00669	0.839125	0.0706592	-2.08	0.037	0.71146	0.989698
PI(36:3)	-ve	0.976281	0.035645	-0.66	0.511	0.908859	1.0487	0.972584	0.0359626	-0.75	0.452	0.904592	1.04569
PI(36:4)	-ve	1.00016	0.0327367	0	0.996	0.938011	1.06642	0.997049	0.0334555	-0.09	0.93	0.933587	1.06482
PI(36:5)	-ve	1.01748	0.0132324	1.33	0.183	0.991869	1.04374	1.00882	0.014307	0.62	0.536	0.981163	1.03725
PI(38:1)	-ve	0.950848	0.0442552	-1.08	0.279	0.867949	1.04167	0.971016	0.0463773	-0.62	0.538	0.884243	1.0663
PI(38:3)	-ve	0.951632	0.0559057	-0.84	0.399	0.848132	1.06776	0.964864	0.0592079	-0.58	0.56	0.855526	1.08818
PI(38:4)	-ve	0.894898	0.0713322	-1.39	0.164	0.765463	1.04622	0.894655	0.0744448	-1.34	0.181	0.760023	1.05314
PI(38:5)	-ve	0.807088	0.0639326	-2.71	0.007	0.691025	0.942644	0.797712	0.0660256	-2.73	0.006	0.678255	0.938207
PI(38:6)	-ve	0.95022	0.0386321	-1.26	0.209	0.877441	1.02904	0.93854	0.0398194	-1.5	0.135	0.863653	1.01992
PI(39:0) & PA(52:10)	-ve	0.985731	0.0346832	-0.41	0.683	0.920044	1.05611	0.970398	0.0353924	-0.82	0.41	0.903452	1.04231
PI(40:5)	-ve	0.991547	0.0208721	-0.4	0.687	0.951471	1.03331	0.989483	0.0210093	-0.5	0.619	0.94915	1.03153
PI(40:6)	-ve	0.955034	0.067183	-0.65	0.513	0.832032	1.09622	0.928045	0.0690787	-1	0.316	0.802066	1.07381
PI(52:2) & TGox(66:12)+Cl-35	-ve	0.895466	0.0407093	-2.43	0.015	0.819129	0.978917	0.906014	0.0417437	-2.14	0.032	0.827784	0.991638
PI(52:3)	-ve	0.961559	0.0299619	-1.26	0.208	0.904592	1.02211	0.962834	0.0296692	-1.23	0.219	0.906405	1.02278
PI-O(38:1)_[M-H]1-	-ve	1.03968	0.0405813	1	0.319	0.96311	1.12234	1.03538	0.0435782	0.83	0.409	0.953401	1.12442
PIP(45:5)	-ve	1.02117	0.0164095	1.3	0.192	0.989505	1.05384	1.02235	0.0167466	1.35	0.177	0.990051	1.05571
PIP(48:4) & LPS(20:0)	-ve	0.954492	0.0261533	-1.7	0.089	0.904584	1.00715	0.961916	0.0269587	-1.39	0.166	0.910503	1.01623
PS(27:0)	-ve	0.981267	0.0318247	-0.58	0.56	0.920833	1.04567	0.98563	0.0342432	-0.42	0.677	0.920749	1.05508
PS(29:0)	-ve	0.988611	0.0247638	-0.46	0.647	0.941248	1.03836	0.987099	0.0255905	-0.5	0.616	0.938196	1.03855
PS(29:2)_[M-H]1-	-ve	0.99663	0.0280144	-0.12	0.904	0.943208	1.05308	0.991949	0.0290001	-0.28	0.782	0.936707	1.05045
PS(31:3)	-ve	1.01235	0.0162126	0.77	0.443	0.981066	1.04463	1.0133	0.0171362	0.78	0.435	0.980261	1.04745
PS(31:3)_[M-H]1-	-ve	1.01356	0.0161179	0.85	0.397	0.982454	1.04564	1.01454	0.016958	0.86	0.388	0.981842	1.04833
PS(35:0)	-ve	1.01228	0.0492715	0.25	0.802	0.920171	1.1136	0.994672	0.0492759	-0.11	0.914	0.902634	1.0961
PS(41:6)	-ve	1.0051	0.0235292	0.22	0.828	0.960024	1.05229	1.00519	0.0241856	0.21	0.83	0.958884	1.05373
PS(43:6)	-ve	1.04124	0.0225523	1.87	0.062	0.997965	1.08639	1.04429	0.0234335	1.93	0.053	0.999352	1.09124
PS(47:2)	-ve	1.06109	0.0501333	1.26	0.209	0.967245	1.16404	1.0671	0.0527493	1.31	0.189	0.968562	1.17566
PS(49:1)	-ve	0.915075	0.0461208	-1.76	0.078	0.829002	1.01009	0.928604	0.0495764	-1.39	0.165	0.836347	1.03104
PS(51:8)	-ve	0.987738	0.0196773	-0.62	0.536	0.949914	1.02707	0.983274	0.0210998	-0.79	0.432	0.942776	1.02551
PS-O(32:1)_[M-H]1-	-ve	0.946925	0.0302066	-1.71	0.087	0.889534	1.00802	0.946297	0.031834	-1.64	0.101	0.885916	1.01079
PS-P(30:1)_[M-H]1-	-ve	0.97525	0.0313129	-0.78	0.435	0.915769	1.03859	0.970309	0.031835	-0.92	0.358	0.909878	1.03476
PS-P(32:1)_[M-H]1-	-ve	0.990815	0.0139945	-0.65	0.514	0.963763	1.01863	0.991617	0.0161801	-0.52	0.606	0.960406	1.02384
PT(36:1)	-ve	0.874695	0.0812492	-1.44	0.15	0.729104	1.04936	0.856743	0.0833207	-1.59	0.112	0.708058	1.03665
SM(32:1)	+ve	0.866296	0.0430283	-2.89	0.004	0.785937	0.954871	0.841769	0.0434272	-3.34	0.001	0.760815	0.931336
SM(32:2)	+ve	0.974651	0.0270451	-0.93	0.355	0.923059	1.02913	0.961539	0.0278906	-1.35	0.176	0.908399	1.01779
SM(33:1)	+ve	0.930504	0.0399524	-1.68	0.093	0.855403	1.0122	0.910756	0.0406584	-2.09	0.036	0.834454	0.994035
SM(33:2)	+ve	0.999722	0.0092886	-0.03	0.976	0.981681	1.01809	0.999067	0.0096703	-0.1	0.923	0.980292	1.0182
SM(34:1)	+ve	0.870873	0.0488503	-2.46	0.014	0.780204	0.972079	0.838195	0.0491786	-3.01	0.003	0.747143	0.940344
SM(34:2)	+ve	0.901878	0.0473479	-1.97	0.049	0.813692	0.99962	0.847918	0.0469652	-2.98	0.003	0.760688	0.94515
SM(35:1)	+ve	1.0135	0.0331684	0.41	0.682	0.950531	1.08064	1.00249	0.036166	0.07	0.945	0.934049	1.07594
SM(36:1)	+ve	0.948509	0.0491701	-1.02	0.308	0.856872	1.04995	0.927391	0.0498326	-1.4	0.161	0.834688	1.03039
SM(36:2)	+ve	0.941048	0.0467836	-1.22	0.222	0.85368	1.03736	0.901762	0.0473196	-1.97	0.049	0.813628	0.999444
SM(36:4)	+ve	0.926182	0.0355463	-2	0.046	0.859068	0.998539	0.906551	0.0373592	-2.38	0.017	0.836208	0.982813
SM(37:1)	+ve	0.994763	0.0260096	-0.2	0.841	0.94507	1.04707	0.995514	0.0276638	-0.16	0.871	0.942744	1.05124
SM(38:1)	+ve	0.90043	0.0485819	-1.94	0.052	0.810073	1.00087	0.895705	0.0495028	-1.99	0.046	0.803752	0.998179
SM(38:4)	+ve	0.968658	0.023011	-1.34	0.18	0.924591	1.01483	0.968967	0.0241775	-1.26	0.206	0.92272	1.01753
SM(39:1)	+ve	0.95374	0.0433578	-1.04	0.297	0.872437	1.04262	0.944707	0.0446209	-1.2	0.228	0.861178	1.03634
SM(39:2)	+ve	0.981376	0.0236952	-0.78	0.436	0.936016	1.02893	0.974058	0.0249781	-1.02	0.305	0.926312	1.02426
SM(40:1)	+ve	0.962595	0.0505391	-0.73	0.468	0.868467	1.06693	0.944795	0.05155	-1.04	0.298	0.848974	1.05143
SM(40:2)	+ve	0.894344	0.0484598	-2.06	0.039	0.804234	0.99455	0.863727	0.0487122	-2.6	0.009	0.77334	0.964678
SM(41:1)	+ve	0.949905	0.0521252	-0.94	0.349	0.853044	1.05777	0.92617	0.0527901	-1.35	0.178	0.828273	1.03564
SM(41:2)	+ve	0.872199	0.0471735	-2.53	0.011	0.784472	0.969736	0.843562	0.0473722	-3.03	0.002	0.755641	0.941712
SM(42:0)	+ve	0.973142	0.0363651	-0.73	0.466	0.904415	1.04709	0.984034	0.0391317	-0.4	0.686	0.91025	1.0638
SM(42:1)	+ve	0.875816	0.0548702	-2.12	0.034	0.774613	0.990241	0.846181	0.0569645	-2.48	0.013	0.741584	0.96553
SM(42:2)	+ve	0.925602	0.0507753	-1.41	0.159	0.831247	1.03067	0.911624	0.0514292	-1.64	0.101	0.816197	1.01821
SM(42:3)	+ve	0.89406	0.0401649	-2.49	0.013	0.818704	0.976351	0.864123	0.0403523	-3.13	0.002	0.788546	0.946945
SM(42:4)	+ve	0.886162	0.0443489	-2.41	0.016	0.803366	0.97749	0.857902	0.0447536	-2.94	0.003	0.774522	0.950259
SM(42:5)	+ve	0.988719	0.0244407	-0.46	0.646	0.941958	1.0378	0.976608	0.0250344	-0.92	0.356	0.928754	1.02693
SM(43:4)	+ve	0.992621	0.0180008	-0.41	0.683	0.957959	1.02854	0.991811	0.019184	-0.43	0.671	0.954915	1.03013
SM(43:5)	+ve	0.992525	0.0171211	-0.43	0.664	0.959529	1.02666	0.989117	0.0179536	-0.6	0.547	0.954547	1.02494
SM(44:0)	+ve	1.08893	0.0480248	1.93	0.053	0.998762	1.18725	1.13748	0.052945	2.77	0.006	1.03831	1.24613
SM(44:4)	+ve	0.981717	0.0243129	-0.75	0.456	0.935203	1.03055	0.977924	0.025478	-0.86	0.392	0.929242	1.02916
SM(44:5)	+ve	0.933064	0.0375451	-1.72	0.085	0.862304	1.00963	0.93272	0.0386636	-1.68	0.093	0.859938	1.01166
SM(44:6)	+ve	0.956851	0.0327404	-1.29	0.197	0.894786	1.02322	0.952318	0.0338727	-1.37	0.17	0.88819	1.02108
SM(45:0)	+ve	1.0317	0.0280759	1.15	0.252	0.97811	1.08822	1.02956	0.0291514	1.03	0.304	0.97398	1.08831
SM(46:0)	+ve	1.09186	0.0502097	1.91	0.056	0.997757	1.19484	1.0908	0.0535358	1.77	0.077	0.990759	1.20094
SM(46:1)	+ve	1.03644	0.0463938	0.8	0.424	0.949383	1.13148	1.05899	0.0498032	1.22	0.223	0.965743	1.16125
SM(47:0)	+ve	1.06558	0.0323892	2.09	0.037	1.00396	1.13099	1.07095	0.0342759	2.14	0.032	1.00584	1.14028
SM(47:1)	+ve	1.02757	0.0197125	1.42	0.156	0.989653	1.06694	1.02963	0.0207571	1.45	0.148	0.989735	1.07112
SM(48:1)	+ve	1.07454	0.0488293	1.58	0.114	0.982974	1.17464	1.07864	0.0516109	1.58	0.114	0.982087	1.1847
TG(38:4)	+ve	0.953719	0.0386929	-1.17	0.243	0.880819	1.03265	0.943288	0.0405849	-1.36	0.175	0.867005	1.02628
TG(40:4)	+ve	0.878346	0.0487438	-2.34	0.019	0.787823	0.979272	0.847173	0.0491483	-2.86	0.004	0.756119	0.949192
TG(40:5)	+ve	0.926668	0.0458053	-1.54	0.123	0.841103	1.02094	0.884873	0.0456211	-2.37	0.018	0.799827	0.978963
TG(41:3)+Cl-37	-ve	0.986708	0.0354686	-0.37	0.71	0.919584	1.05873	0.991767	0.0371648	-0.22	0.825	0.921536	1.06735
TG(42:0)	+ve	1.01635	0.0138904	1.19	0.236	0.989482	1.04394	1.01431	0.0143766	1	0.316	0.986521	1.04288
TG(42:4)	+ve	0.934941	0.0479474	-1.31	0.19	0.845535	1.0338	0.917277	0.0485807	-1.63	0.103	0.826836	1.01761
TG(42:4)+Cl-37	-ve	1.03371	0.068297	0.5	0.616	0.908157	1.17663	0.978637	0.0717023	-0.29	0.768	0.847727	1.12976
TG(42:5)	+ve	0.976494	0.0428898	-0.54	0.588	0.895949	1.06428	0.950865	0.0434906	-1.1	0.271	0.869334	1.04004
TG(44:0)	+ve	1.02999	0.0194047	1.57	0.117	0.992655	1.06874	1.0238	0.0199604	1.21	0.228	0.985417	1.06368
TG(44:1)	+ve	1.00421	0.0199219	0.21	0.832	0.965914	1.04403	0.99852	0.0206517	-0.07	0.943	0.958853	1.03983
TG(44:4)	+ve	0.939007	0.0502352	-1.18	0.239	0.845535	1.04281	0.935338	0.0508405	-1.23	0.219	0.840817	1.04049
TG(44:5)	+ve	0.973529	0.0351591	-0.74	0.458	0.907001	1.04494	0.974396	0.0371806	-0.68	0.497	0.904182	1.05006
TG(45:4)	+ve	1.00986	0.0326338	0.3	0.761	0.947879	1.07589	1.003	0.0366968	0.08	0.935	0.933597	1.07757
TG(46:0)	+ve	1.06891	0.026138	2.73	0.006	1.01889	1.12139	1.06522	0.0269957	2.49	0.013	1.0136	1.11946
TG(46:1)	+ve	0.995213	0.0294424	-0.16	0.871	0.939148	1.05462	0.996763	0.0305213	-0.11	0.916	0.938702	1.05842
TG(46:2)	+ve	0.98868	0.0266789	-0.42	0.673	0.937749	1.04238	0.98668	0.027531	-0.48	0.631	0.934169	1.04214
TG(46:3)	+ve	0.997813	0.0196658	-0.11	0.912	0.960004	1.03711	0.996403	0.020339	-0.18	0.86	0.957326	1.03707
TG(46:4)	+ve	0.812671	0.0576926	-2.92	0.003	0.70711	0.933991	0.802765	0.0597397	-2.95	0.003	0.693816	0.928823
TG(46:5)	+ve	0.829254	0.050551	-3.07	0.002	0.735866	0.934494	0.798178	0.0508914	-3.54	0	0.704413	0.904423
TG(46:7)+Cl-35	-ve	0.983961	0.0661324	-0.24	0.81	0.862518	1.1225	0.96695	0.0673061	-0.48	0.629	0.843635	1.10829
TG(46:8)+Cl-35	-ve	1.07309	0.0308287	2.46	0.014	1.01434	1.13525	1.08464	0.0325921	2.7	0.007	1.0226	1.15044
TG(47:4)	+ve	0.924627	0.0516753	-1.4	0.161	0.828696	1.03166	0.90849	0.0528413	-1.65	0.099	0.810608	1.01819
TG(47:5)	+ve	0.92892	0.0452599	-1.51	0.13	0.844316	1.022	0.910877	0.0460517	-1.85	0.065	0.824945	1.00576
TG(48:0)	+ve	1.11238	0.0370859	3.19	0.001	1.04202	1.18749	1.10888	0.0378963	3.02	0.002	1.03704	1.1857
TG(48:1)	+ve	1.07577	0.0415571	1.89	0.059	0.997329	1.16038	1.08971	0.0440894	2.12	0.034	1.00663	1.17964
TG(48:2)	+ve	1.03568	0.0447945	0.81	0.418	0.951507	1.12731	1.05096	0.0474143	1.1	0.271	0.962016	1.14812
TG(48:3)	+ve	0.967941	0.0382295	-0.83	0.409	0.895839	1.04585	0.979259	0.0399825	-0.51	0.608	0.903949	1.06085
TG(48:4)	+ve	0.846182	0.046343	-3.05	0.002	0.760056	0.942067	0.844691	0.0486956	-2.93	0.003	0.754444	0.945734
TG(48:4)_[M+OAc]1- & TG(49:0)+Cl-37	-ve	0.997901	0.0164252	-0.13	0.898	0.966222	1.03062	0.997569	0.0171526	-0.14	0.887	0.964511	1.03176
TG(48:4)+Cl-37	-ve	1.05712	0.0379058	1.55	0.121	0.985376	1.13409	1.06263	0.0391723	1.65	0.099	0.988564	1.14225
TG(48:5)	+ve	0.832695	0.0584058	-2.61	0.009	0.725741	0.95541	0.827068	0.0601438	-2.61	0.009	0.717204	0.953762
TG(48:6)	+ve	0.853071	0.0482854	-2.81	0.005	0.763494	0.953157	0.819105	0.0483243	-3.38	0.001	0.729662	0.919512
TG(48:8)	+ve	1.00141	0.0231901	0.06	0.951	0.956974	1.04791	0.995684	0.0240582	-0.18	0.858	0.949631	1.04397
TG(49:1)	+ve	1.02902	0.0308027	0.96	0.339	0.970384	1.0912	1.01296	0.0317904	0.41	0.682	0.952529	1.07722
TG(49:2)	+ve	1.01537	0.0323425	0.48	0.632	0.953919	1.08078	1.0068	0.0334741	0.2	0.838	0.943288	1.0746
TG(49:5)	+ve	0.965356	0.0214593	-1.59	0.113	0.9242	1.00835	0.96618	0.0216441	-1.54	0.125	0.924677	1.00955
TG(50:1)	+ve	1.19042	0.054126	3.83	0	1.08893	1.30138	1.19301	0.0566784	3.71	0	1.08693	1.30943
TG(50:10)+Cl-35	-ve	0.984074	0.0269259	-0.59	0.557	0.93269	1.03829	0.985463	0.028955	-0.5	0.618	0.930315	1.04388
TG(50:2)	+ve	1.16275	0.0626063	2.8	0.005	1.04629	1.29216	1.20852	0.0695712	3.29	0.001	1.07957	1.35286
TG(50:3)	+ve	1.105	0.062609	1.76	0.078	0.988854	1.23478	1.15245	0.069363	2.36	0.018	1.02421	1.29674
TG(50:4)	+ve	1.0365	0.0510196	0.73	0.466	0.941178	1.14148	1.07324	0.0552279	1.37	0.17	0.970278	1.18714
TG(50:5)	+ve	1.06677	0.0290923	2.37	0.018	1.01125	1.12534	1.07072	0.0303327	2.41	0.016	1.01288	1.13185
TG(50:8)	+ve	0.96052	0.0308312	-1.25	0.21	0.901954	1.02289	0.966928	0.0319507	-1.02	0.309	0.90629	1.03162
TG(50:9)	+ve	0.945629	0.0275961	-1.92	0.055	0.89306	1.00129	0.946023	0.0286702	-1.83	0.067	0.891466	1.00392
TG(51:1)	+ve	1.10537	0.0425664	2.6	0.009	1.02501	1.19203	1.09647	0.0438405	2.3	0.021	1.01382	1.18585
TG(51:2)	+ve	1.04242	0.0583432	0.74	0.458	0.934122	1.16328	1.06346	0.0635469	1.03	0.303	0.945926	1.19559
TG(51:3)	+ve	1.00385	0.0535919	0.07	0.943	0.904116	1.11458	1.01209	0.0565812	0.21	0.83	0.907052	1.12929
TG(51:4)	+ve	1.03249	0.0296537	1.11	0.266	0.975973	1.09228	1.02742	0.030739	0.9	0.366	0.968901	1.08946
TG(51:5)	+ve	1.13126	0.0348392	4	0	1.065	1.20165	1.14496	0.0373731	4.15	0	1.074	1.2206
TG(52:10)+Cl-35	-ve	1.0257	0.038375	0.68	0.498	0.953179	1.10374	1.02514	0.0412881	0.62	0.538	0.947324	1.10934
TG(52:2)	+ve	1.06372	0.0508834	1.29	0.197	0.968519	1.16827	1.10654	0.0568826	1.97	0.049	1.00049	1.22384
TG(52:3)	+ve	1.08053	0.0557657	1.5	0.133	0.976581	1.19555	1.09519	0.0593026	1.68	0.093	0.984919	1.21782
TG(52:4)	+ve	1.09321	0.0506916	1.92	0.055	0.998238	1.19722	1.09164	0.0540502	1.77	0.077	0.990685	1.20289
TG(52:4)+Cl-35	-ve	0.999737	0.0254	-0.01	0.992	0.951173	1.05078	0.990127	0.0295501	-0.33	0.74	0.933871	1.04977
TG(52:5)	+ve	1.04302	0.0474914	0.92	0.355	0.953968	1.14038	1.05825	0.0504173	1.19	0.235	0.963903	1.16182
TG(52:5)+Cl-35	-ve	0.991325	0.0360743	-0.24	0.811	0.923083	1.06461	0.983992	0.038028	-0.42	0.676	0.912211	1.06142
TG(52:6)	+ve	1.07986	0.0337994	2.45	0.014	1.0156	1.14818	1.0818	0.0353059	2.41	0.016	1.01477	1.15326
TG(52:6)+Cl-35	-ve	0.988784	0.0198504	-0.56	0.574	0.950633	1.02847	0.987693	0.0210612	-0.58	0.561	0.947265	1.02985
TG(53:1)	+ve	1.03877	0.0198284	1.99	0.046	1.00063	1.07837	1.03975	0.020405	1.99	0.047	1.00052	1.08052
TG(53:2)	+ve	1.07893	0.0534409	1.53	0.125	0.979108	1.18892	1.12819	0.0597082	2.28	0.023	1.01703	1.25151
TG(53:3)	+ve	1.09327	0.0554211	1.76	0.079	0.989866	1.20747	1.12577	0.0599084	2.23	0.026	1.01427	1.24954
TG(53:4)	+ve	1.12208	0.041874	3.09	0.002	1.04293	1.20722	1.13648	0.0436189	3.33	0.001	1.05413	1.22527
TG(53:5)	+ve	1.04721	0.025198	1.92	0.055	0.998969	1.09778	1.03981	0.0258564	1.57	0.116	0.990349	1.09174
TG(53:6)	+ve	1.02473	0.0341105	0.73	0.463	0.960003	1.09381	1.05302	0.0367387	1.48	0.139	0.98342	1.12755
TG(53:7)	+ve	0.994115	0.031777	-0.18	0.853	0.933744	1.05839	1.00199	0.0333438	0.06	0.952	0.938725	1.06952
TG(54:1)	+ve	1.04167	0.0275354	1.54	0.122	0.989077	1.09706	1.06024	0.0289066	2.15	0.032	1.00507	1.11844
TG(54:2)	+ve	1.03118	0.0482183	0.66	0.511	0.940872	1.13015	1.05635	0.0508585	1.14	0.255	0.961229	1.16089
TG(54:3)	+ve	0.949414	0.0436555	-1.13	0.259	0.867593	1.03895	0.980631	0.0471147	-0.41	0.684	0.892502	1.07746
TG(54:4)	+ve	1.00268	0.0465368	0.06	0.954	0.915491	1.09816	1.01788	0.0491567	0.37	0.714	0.925957	1.11894
TG(54:5)	+ve	1.07366	0.0480279	1.59	0.112	0.983539	1.17205	1.07787	0.0507094	1.59	0.111	0.982923	1.18198
TG(54:6)	+ve	1.10661	0.0436576	2.57	0.01	1.02427	1.19558	1.0958	0.0460052	2.18	0.029	1.00924	1.18978
TG(54:7)	+ve	1.04978	0.0321122	1.59	0.112	0.988695	1.11465	1.03965	0.0333957	1.21	0.226	0.976218	1.10721
TG(55:2)	+ve	1.03642	0.0248003	1.49	0.135	0.988935	1.08619	1.04256	0.0258428	1.68	0.093	0.99312	1.09446
TG(55:3)	+ve	1.05023	0.0267864	1.92	0.055	0.999023	1.10407	1.06204	0.0281913	2.27	0.023	1.0082	1.11875
TG(55:4)	+ve	1.03877	0.0204872	1.93	0.054	0.999386	1.07971	1.04506	0.0214026	2.15	0.031	1.00395	1.08786
TG(55:5)	+ve	0.996083	0.0129324	-0.3	0.762	0.971056	1.02175	0.998922	0.0134875	-0.08	0.936	0.972834	1.02571
TG(55:8)	+ve	0.996732	0.0131019	-0.25	0.803	0.971381	1.02275	0.99637	0.0138211	-0.26	0.793	0.969646	1.02383
TG(56:1)	+ve	1.00772	0.0081305	0.95	0.34	0.991913	1.02379	1.00959	0.008133	1.18	0.236	0.993772	1.02565
TG(56:2)	+ve	1.07442	0.0414604	1.86	0.063	0.996161	1.15884	1.10577	0.0443761	2.51	0.012	1.02213	1.19626
TG(56:3)	+ve	1.01389	0.0401568	0.35	0.728	0.938157	1.09573	1.02812	0.0417787	0.68	0.495	0.949414	1.11336
TG(56:4)	+ve	1.06128	0.0446199	1.41	0.157	0.977336	1.15244	1.08231	0.0475622	1.8	0.072	0.992991	1.17966
TG(56:5)	+ve	1.05046	0.0475593	1.09	0.277	0.961265	1.14794	1.09039	0.0517186	1.82	0.068	0.993596	1.19662
TG(56:6)	+ve	0.983476	0.0376632	-0.44	0.664	0.91236	1.06014	0.985564	0.0387841	-0.37	0.712	0.912406	1.06459
TG(56:7)	+ve	1.08312	0.0406818	2.13	0.034	1.00625	1.16587	1.06251	0.0422034	1.53	0.127	0.982928	1.14853
TG(56:8)	+ve	1.0478	0.0241254	2.03	0.043	1.00157	1.09617	1.03014	0.0254697	1.2	0.23	0.981412	1.08129
TG(58:7)	+ve	1.04083	0.0290005	1.44	0.151	0.985512	1.09925	1.03865	0.0303994	1.3	0.195	0.98074	1.09997
TG(58:8)	+ve	1.03273	0.0308421	1.08	0.281	0.974018	1.09499	1.03284	0.0319383	1.05	0.296	0.972105	1.09738
TG(60:0)+Cl-37 & TG(59:4)_[M+OAc]1-	-ve	1.01045	0.0107888	0.97	0.33	0.989528	1.03182	1.00991	0.010835	0.92	0.358	0.988891	1.03137
TG(60:1)+Cl-37 & TG(59:5)_[M+OAc]1-	-ve	0.997183	0.0081721	-0.34	0.731	0.981294	1.01333	0.995759	0.0084832	-0.5	0.618	0.97927	1.01253
TG(60:14)_[M+OAc]1- & PI(46:0)	-ve	1.01135	0.033288	0.34	0.732	0.948164	1.07874	1.01286	0.0349416	0.37	0.711	0.946644	1.08372
TG(61:5)+Cl-37 & TG(60:9)_[M+OAc]1-	-ve	0.921333	0.0625021	-1.21	0.227	0.806625	1.05235	0.946636	0.0670841	-0.77	0.439	0.823877	1.08769
TG(61:6)+Cl-37 & TG(60:10)_[M+OAc]1-	-ve	0.911988	0.0713551	-1.18	0.239	0.78233	1.06313	0.893053	0.0733024	-1.38	0.168	0.760344	1.04893
TG(61:7)+Cl-37 & TG(60:11)_[M+OAc]1-	-ve	1.01409	0.0515506	0.28	0.783	0.917921	1.12033	1.03399	0.0552679	0.63	0.532	0.931146	1.14819
TG(61:8)+Cl-37 & TG(60:12)_[M+OAc]1-	-ve	0.986516	0.037059	-0.36	0.718	0.916492	1.06189	0.990708	0.0388359	-0.24	0.812	0.917442	1.06983
TG(61:9)+Cl-37 & TG(60:13)_[M+OAc]1-	-ve	0.990814	0.0312027	-0.29	0.769	0.931507	1.0539	0.99626	0.0329148	-0.11	0.91	0.933793	1.06291
TG(62:12)+Cl-35	-ve	0.970556	0.0213478	-1.36	0.174	0.929604	1.01331	0.970483	0.0219163	-1.33	0.185	0.928465	1.0144
TG(62:6)+Cl-37	-ve	0.979863	0.0207613	-0.96	0.337	0.940005	1.02141	0.976144	0.0226235	-1.04	0.298	0.932795	1.02151
TG(63:5)+Cl-37 & TG(62:9)_[M+OAc]1-	-ve	0.978157	0.052857	-0.41	0.683	0.879856	1.08744	0.994399	0.0553276	-0.1	0.92	0.891662	1.10897
TG(63:6)+Cl-37	-ve	0.946316	0.0713493	-0.73	0.464	0.816315	1.09702	0.929855	0.0734861	-0.92	0.357	0.796426	1.08564
TG(63:7)+Cl-37 & TG(62:11)_[M+OAc]1-	-ve	1.00024	0.0612695	0	0.997	0.887082	1.12783	0.988994	0.0641508	-0.17	0.865	0.870925	1.12307
TG(63:8)+Cl-37 & TG(62:12)_[M+OAc]1-	-ve	0.942059	0.0681986	-0.82	0.41	0.817442	1.08567	0.915084	0.0690328	-1.18	0.239	0.789309	1.0609
TG(64:10)_[M+OAc]1- & TG(65:6)+Cl-37	-ve	0.974534	0.055947	-0.45	0.653	0.870824	1.09059	0.96784	0.057936	-0.55	0.585	0.860695	1.08832
TG(64:11)_[M+OAc]1-	-ve	1.04787	0.046174	1.06	0.289	0.961171	1.1424	1.04879	0.0488703	1.02	0.307	0.957255	1.14909
TG(64:14)_[M+OAc]1- & TG(65:10)+Cl-37 & PI(50:0) & TGox(64:10)+Cl-35	-ve	0.892273	0.0608968	-1.67	0.095	0.780556	1.01998	0.906715	0.0641256	-1.38	0.166	0.789353	1.04153
TG(64:15)_[M+OAc]1- & TG(65:11)+Cl-37 & PI(50:1) & TGox(64:11)+Cl-35	-ve	0.949862	0.0434966	-1.12	0.261	0.868324	1.03906	0.962246	0.0462668	-0.8	0.423	0.875707	1.05734
TG(64:16)_[M+OAc]1- & PI(50:2)	-ve	0.94491	0.0264475	-2.02	0.043	0.89447	0.998195	0.95383	0.0263526	-1.71	0.087	0.903553	1.0069
TG(65:8)+Cl-37	-ve	0.996932	0.0561114	-0.05	0.956	0.892804	1.1132	0.975316	0.0572076	-0.43	0.67	0.869396	1.09414
TGox(36:0)	+ve	0.991831	0.0392934	-0.21	0.836	0.917731	1.07191	0.994156	0.0420579	-0.14	0.89	0.915049	1.0801
TGox(38:2)	+ve	0.927955	0.0314774	-2.2	0.028	0.868267	0.991747	0.919873	0.0329622	-2.33	0.02	0.857485	0.986801
TGox(38:4)_[M+OAc]1- & SM(32:1)_[M+OAc]1- & TGox(39:0)+Cl-37	-ve	0.87241	0.0808164	-1.47	0.141	0.72756	1.0461	0.837558	0.0811152	-1.83	0.067	0.692753	1.01263
TGox(38:5)_[M+OAc]1- & SM(32:2)_[M+OAc]1- & TGox(39:1)+Cl-37	-ve	0.953749	0.0532684	-0.85	0.397	0.854856	1.06408	0.909446	0.0533305	-1.62	0.106	0.810703	1.02022
TGox(39:4)_[M+OAc]1- & SM(33:1)_[M+OAc]1- & TGox(40:0)+Cl-37	-ve	0.803826	0.07225	-2.43	0.015	0.673991	0.958673	0.783905	0.0730113	-2.61	0.009	0.653107	0.940898
TGox(40:4)_[M+OAc]1- & SM(34:1)_[M+OAc]1- & TGox(41:0)+Cl-37	-ve	0.918726	0.0876267	-0.89	0.374	0.762078	1.10757	0.890756	0.0877347	-1.17	0.24	0.734379	1.08043
TGox(40:5)_[M+OAc]1- & SM(34:2)_[M+OAc]1- & TGox(41:1)+Cl-37 & CL(76:1)_[M]2-	-ve	0.916619	0.0895121	-0.89	0.373	0.756946	1.10997	0.837406	0.0855656	-1.74	0.082	0.685426	1.02308
TGox(40:6)_[M+OAc]1- & CL(76:3)_[M]2- & TGox(41:2)+Cl-37	-ve	1.02565	0.0324581	0.8	0.424	0.963967	1.09128	1.01863	0.033517	0.56	0.575	0.955009	1.08648
TGox(42:0)+Cl-37 & TGox(41:4)_[M+OAc]1- & SM(35:1)_[M+OAc]1-	-ve	0.833098	0.0817529	-1.86	0.063	0.687332	1.00978	0.817291	0.0824626	-2	0.046	0.670645	0.996003
TGox(42:1)+Cl-37 & CL(78:1)_[M]2-	-ve	0.923489	0.0668824	-1.1	0.272	0.801281	1.06434	0.888964	0.0689469	-1.52	0.129	0.7636	1.03491
TGox(42:2)+Cl-37	-ve	0.890028	0.0864099	-1.2	0.23	0.735806	1.07657	0.882791	0.0892753	-1.23	0.218	0.724064	1.07631
TGox(42:4)_[M+OAc]1- & SM(36:1)_[M+OAc]1- & TGox(43:0)+Cl-37	-ve	1.04351	0.0962993	0.46	0.644	0.870851	1.2504	1.02724	0.0977482	0.28	0.778	0.85246	1.23785
TGox(42:5)_[M+OAc]1- & SM(36:2)_[M+OAc]1- & TGox(43:1)+Cl-37	-ve	0.974526	0.0911447	-0.28	0.783	0.811303	1.17059	0.919543	0.089799	-0.86	0.39	0.759358	1.11352
TGox(42:6)_[M+OAc]1- & SM(36:3)_[M+OAc]1- & TGox(43:2)+Cl-37	-ve	1.00653	0.055465	0.12	0.906	0.903482	1.12132	0.976732	0.056082	-0.41	0.682	0.872773	1.09307
TGox(43:2)	+ve	1.02543	0.0152581	1.69	0.092	0.995952	1.05577	1.02408	0.0156203	1.56	0.119	0.993915	1.05516
TGox(44:4)_[M+OAc]1- & SM(38:1)_[M+OAc]1- & TGox(45:0)+Cl-37	-ve	0.943277	0.096424	-0.57	0.568	0.772018	1.15253	0.952338	0.0993413	-0.47	0.64	0.776247	1.16838
TGox(44:5)_[M+OAc]1- & SM(38:2)_[M+OAc]1- & TGox(45:1)+Cl-37	-ve	0.822492	0.0807365	-1.99	0.047	0.678542	0.996979	0.801768	0.0805523	-2.2	0.028	0.658461	0.976265
TGox(44:6)_[M+OAc]1- & SM(38:3)_[M+OAc]1- & TGox(45:2)+Cl-37	-ve	1.01852	0.0350072	0.53	0.594	0.952162	1.08949	1.01183	0.036082	0.33	0.742	0.943524	1.08508
TGox(46:0)+Cl-37 & TGox(45:4)_[M+OAc]1- & SM(39:1)_[M+OAc]1-	-ve	0.874585	0.0894325	-1.31	0.19	0.715749	1.06867	0.862154	0.0910069	-1.41	0.16	0.701026	1.06032
TGox(46:1)+Cl-37 & TGox(45:5)_[M+OAc]1- & SM(39:2)_[M+OAc]1-	-ve	0.765716	0.0738592	-2.77	0.006	0.633816	0.925066	0.747301	0.0740525	-2.94	0.003	0.615386	0.907495
TGox(46:3)+Cl-37	-ve	0.994757	0.0115685	-0.45	0.651	0.97234	1.01769	0.994795	0.0115965	-0.45	0.654	0.972324	1.01778
TGox(46:4)_[M+OAc]1- & SM(40:1)_[M+OAc]1- & TGox(47:0)+Cl-37	-ve	1.06075	0.104104	0.6	0.548	0.875128	1.28573	1.04864	0.105651	0.47	0.637	0.860728	1.27757
TGox(46:4)+Cl-35 & PA(45:4)	-ve	0.998778	0.059479	-0.02	0.984	0.888747	1.12243	1.0153	0.0629676	0.24	0.807	0.899086	1.14652
TGox(46:4)+Cl-37	-ve	0.991927	0.0238728	-0.34	0.736	0.946223	1.03984	0.992301	0.0234351	-0.33	0.743	0.947416	1.03931
TGox(46:5)_[M+OAc]1- & SM(40:2)_[M+OAc]1- & TGox(47:1)+Cl-37	-ve	0.927643	0.0956967	-0.73	0.467	0.757826	1.13551	0.888226	0.0941712	-1.12	0.264	0.721569	1.09337
TGox(46:5)+Cl-35 & PA(45:5)	-ve	1.03482	0.10328	0.34	0.732	0.85096	1.2584	1.08091	0.113346	0.74	0.458	0.880096	1.32754
TGox(46:6)_[M+OAc]1- & SM(40:3)_[M+OAc]1- & TGox(47:2)+Cl-37	-ve	1.0622	0.0718647	0.89	0.372	0.930289	1.21282	1.0336	0.071903	0.47	0.635	0.901853	1.18458
TGox(46:6)+Cl-35 & PA(45:6)	-ve	1.08367	0.112592	0.77	0.439	0.884013	1.32842	1.04321	0.112363	0.39	0.695	0.844671	1.28841
TGox(46:7)+Cl-35 & PA(45:7)	-ve	0.947168	0.0926274	-0.56	0.579	0.78196	1.14728	1.01588	0.105156	0.15	0.879	0.829339	1.24438
TGox(47:5)+Cl-37	-ve	0.976852	0.0276711	-0.83	0.408	0.924096	1.03262	0.987167	0.0287928	-0.44	0.658	0.932317	1.04524
TGox(47:6)+Cl-37	-ve	0.999625	0.0257703	-0.01	0.988	0.950371	1.05143	1.00254	0.0270533	0.09	0.925	0.950891	1.05699
TGox(48:0)+Cl-37 & TGox(47:4)_[M+OAc]1- & SM(41:0)_[M+OAc]1-	-ve	1.00893	0.101172	0.09	0.929	0.828903	1.22805	0.984835	0.102002	-0.15	0.883	0.803901	1.20649
TGox(48:1)+Cl-37 & TGox(47:5)_[M+OAc]1- & SM(41:1)_[M+OAc]1-	-ve	0.848848	0.0857608	-1.62	0.105	0.696356	1.03473	0.834546	0.0868777	-1.74	0.082	0.680516	1.02344
TGox(48:2)+Cl-37 & TGox(47:6)_[M+OAc]1-	-ve	0.746533	0.0703386	-3.1	0.002	0.620652	0.897945	0.721644	0.0700113	-3.36	0.001	0.596682	0.872778
TGox(48:3)_[M+OAc]1- & SM(42:0)_[M+OAc]1-	-ve	1.0637	0.0351604	1.87	0.062	0.996971	1.13489	1.07004	0.0342183	2.12	0.034	1.00503	1.13925
TGox(48:4)_[M+OAc]1- & TGox(49:0)+Cl-37 & SM(42:1)_[M_[M+OAc]1-]1-	-ve	0.973099	0.0947505	-0.28	0.779	0.804036	1.17771	0.942547	0.0950403	-0.59	0.557	0.773523	1.1485
TGox(48:5)_[M+OAc]1- & TGox(49:1)+Cl-37 & SM(42:2)_[M_[M+OAc]1-]1-	-ve	0.98291	0.0939928	-0.18	0.857	0.814921	1.18553	0.979577	0.0964698	-0.21	0.834	0.807628	1.18813
TGox(48:6)_[M+OAc]1- & TGox(49:2)+Cl-37 & SM(42:3)_[M_[M+OAc]1-]1-	-ve	0.903498	0.0865178	-1.06	0.289	0.748889	1.09003	0.871175	0.0861803	-1.39	0.163	0.717631	1.05757
TGox(48:6)+Cl-35 & PA(47:6)	-ve	0.966003	0.0941992	-0.35	0.723	0.797947	1.16945	0.946917	0.0960105	-0.54	0.591	0.776258	1.15509
TGox(48:7)+Cl-35 & PA(47:7)	-ve	1.05402	0.0980482	0.57	0.572	0.878349	1.26482	1.07869	0.10719	0.76	0.446	0.887791	1.31063
TGox(48:8)+Cl-35 & PA(47:8)	-ve	1.13934	0.107874	1.38	0.168	0.946366	1.37166	1.08564	0.106245	0.84	0.401	0.896156	1.31519
TGox(48:9)+Cl-35 & PA(47:9)	-ve	1.08873	0.0392298	2.36	0.018	1.01449	1.1684	1.06766	0.0405374	1.72	0.085	0.991092	1.15014
TGox(49:5)+Cl-37 & TGox(48:9)_[M+OAc]1-	-ve	1.04836	0.0266121	1.86	0.063	0.997476	1.10184	1.03489	0.0238646	1.49	0.137	0.989158	1.08274
TGox(49:6)+Cl-37	-ve	1.03539	0.0293512	1.23	0.22	0.979433	1.09455	1.0315	0.0299655	1.07	0.286	0.974406	1.09193
TGox(50:0)+Cl-37 & TGox(49:4)_[M+OAc]1- & SM(43:1)_[M+OAc]1-	-ve	0.942869	0.0615281	-0.9	0.367	0.82967	1.07151	0.943879	0.0643171	-0.85	0.397	0.825875	1.07874
TGox(50:1)+Cl-37 & TGox(49:5)_[M+OAc]1- & SM(43:2)_[M+OAc]1-	-ve	0.98504	0.0674189	-0.22	0.826	0.861381	1.12645	0.991235	0.0705938	-0.12	0.902	0.862097	1.13972
TGox(50:4)_[M+OAc]1- & SM(44:1)_[M+OAc]1- & TGox(51:0)+Cl-37	-ve	0.923355	0.051133	-1.44	0.15	0.828383	1.02921	0.929654	0.052983	-1.28	0.201	0.831399	1.03952
TGox(50:5)_[M+OAc]1- & SM(44:2)_[M+OAc]1- & TGox(51:1)+Cl-37	-ve	0.954298	0.0543587	-0.82	0.412	0.853489	1.06701	0.948245	0.0575539	-0.88	0.381	0.841893	1.06803
TGox(50:5)+Cl-35 & PA(49:5)	-ve	1.00327	0.0284049	0.12	0.908	0.949116	1.06052	1.00776	0.0298748	0.26	0.794	0.950874	1.06805
TGox(50:6)+Cl-37	-ve	0.999182	0.0273177	-0.03	0.976	0.947049	1.05418	1.00522	0.0282914	0.19	0.853	0.951276	1.06223
TGox(50:7)+Cl-35 & PA(49:7)	-ve	1.15164	0.088047	1.85	0.065	0.991381	1.33781	1.18507	0.0966942	2.08	0.037	1.00993	1.39058
TGox(50:7)+Cl-37	-ve	0.941371	0.0436147	-1.3	0.192	0.859654	1.03086	0.943344	0.0462802	-1.19	0.235	0.856861	1.03856
TGox(50:8)+Cl-35 & PA(49:8)	-ve	1.14702	0.102219	1.54	0.124	0.9632	1.36593	1.10025	0.101206	1.04	0.299	0.918747	1.31762
TGox(50:9)+Cl-35 & PA(49:9)	-ve	1.13662	0.117506	1.24	0.215	0.928151	1.39192	1.08246	0.116287	0.74	0.461	0.87694	1.33615
TGox(51:7)+Cl-35 & PA(50:7)	-ve	0.980529	0.0338407	-0.57	0.569	0.916396	1.04915	0.983729	0.0354159	-0.46	0.649	0.916707	1.05565
TGox(52:8)+Cl-35 & PA(51:8)	-ve	1.08384	0.0473556	1.84	0.065	0.994893	1.18075	1.07275	0.047715	1.58	0.114	0.983188	1.17046
TGox(53:0)+Cl-37 & TGox(52:4)_[M+OAc]1-	-ve	0.944935	0.0525125	-1.02	0.308	0.847419	1.05367	0.939598	0.0542392	-1.08	0.28	0.839085	1.05215
TGox(53:1)+Cl-37 & TGox(52:5)_[M+OAc]1-	-ve	0.941476	0.0548071	-1.04	0.3	0.839958	1.05526	0.955951	0.0593455	-0.73	0.468	0.846434	1.07964
TGox(53:6)+Cl-35 & PA(52:6)	-ve	0.922677	0.0618763	-1.2	0.23	0.809034	1.05228	0.914416	0.0634529	-1.29	0.197	0.798137	1.04764
TGox(53:7)+Cl-35 & PA(52:7)	-ve	0.964928	0.0372534	-0.92	0.355	0.894606	1.04078	0.97589	0.0388962	-0.61	0.54	0.902556	1.05518
TGox(53:8)+Cl-37	-ve	1.00935	0.0108512	0.87	0.387	0.988301	1.03084	1.00838	0.0109978	0.77	0.444	0.987053	1.03017
TGox(54:4)_[M+OAc]1- & TGox(55:0)+Cl-37 &	-ve	0.741258	0.0585748	-3.79	0	0.634903	0.86543	0.735271	0.0599755	-3.77	0	0.626636	0.862739
TGox(54:5)_[M+OAc]1- & TGox(55:1)+Cl-37	-ve	0.932834	0.0618604	-1.05	0.294	0.819138	1.06231	0.927765	0.0638295	-1.09	0.276	0.81073	1.0617
TGox(54:7)+Cl-35	-ve	1.1508	0.0548227	2.95	0.003	1.04821	1.26343	1.16474	0.0578595	3.07	0.002	1.05668	1.28385
TGox(55:7)+Cl-35	-ve	1.03426	0.0395375	0.88	0.378	0.959603	1.11473	1.04688	0.0420263	1.14	0.254	0.967662	1.13257
TGox(55:8)+Cl-35	-ve	0.930227	0.0299226	-2.25	0.025	0.87339	0.990762	0.945585	0.0307566	-1.72	0.085	0.887184	1.00783
TGox(56:3)_[M+OAc]1-	-ve	1.02148	0.0274133	0.79	0.428	0.969139	1.07665	1.02364	0.0294624	0.81	0.417	0.967488	1.08304
TGox(56:4)_[M+OAc]1- & TGox(57:0)+Cl-37	-ve	0.793038	0.057897	-3.18	0.001	0.687307	0.915035	0.787864	0.0589799	-3.18	0.001	0.680347	0.912374
TGox(56:5)_[M+OAc]1- & TGox(57:1)+Cl-37	-ve	0.868101	0.0560217	-2.19	0.028	0.764961	0.985148	0.849442	0.0571637	-2.42	0.015	0.744478	0.969205
TGox(56:8)+Cl-35	-ve	1.05276	0.0695829	0.78	0.437	0.924847	1.19837	1.07331	0.0738869	1.03	0.304	0.937839	1.22835
TGox(58:3)_[M+OAc]1-	-ve	0.94	0.039076	-1.49	0.137	0.86645	1.0198	0.93315	0.04048	-1.59	0.111	0.85709	1.01596
TGox(58:4)_[M+OAc]1- & TGox(59:0)+Cl-37	-ve	0.964558	0.057381	-0.61	0.544	0.858402	1.08384	0.954716	0.0583517	-0.76	0.448	0.846933	1.07621
TGox(58:5)_[M+OAc]1- & TGox(59:1)+Cl-37	-ve	0.868876	0.0506742	-2.41	0.016	0.775023	0.974095	0.860565	0.0516617	-2.5	0.012	0.76504	0.968018
TGox(58:6)_[M+OAc]1- & TGox(59:2)+Cl-37	-ve	0.870334	0.0389391	-3.1	0.002	0.797265	0.950099	0.863294	0.0400461	-3.17	0.002	0.788268	0.945462
TGox(60:11)_[M+OAc]1- & TGox(61:7)+Cl-37	-ve	0.968423	0.0215662	-1.44	0.15	0.927064	1.01163	0.97251	0.0202393	-1.34	0.18	0.93364	1.013
TGox(60:4)_[M+OAc]1- & TGox(61:0)+Cl-37	-ve	0.988293	0.0224734	-0.52	0.605	0.945213	1.03334	0.987401	0.0240124	-0.52	0.602	0.941442	1.0356
TGox(60:5)_[M+OAc]1- & TGox(61:1)+Cl-37	-ve	0.963331	0.0382005	-0.94	0.346	0.891295	1.04119	0.952082	0.0398316	-1.17	0.241	0.877128	1.03344
TGox(62:5)_[M+OAc]1- & TGox(63:1)+Cl-37	-ve	0.944859	0.0508821	-1.05	0.292	0.850215	1.05004	0.930604	0.0516713	-1.3	0.195	0.834646	1.03759
TGox(62:6)_[M+OAc]1- & TGox(63:2)+Cl-37	-ve	0.987578	0.036224	-0.34	0.733	0.919073	1.06119	0.959694	0.0373438	-1.06	0.29	0.889223	1.03575
TGox(64:5)_[M+OAc]1- & TGox(65:1)+Cl-37	-ve	1.05077	0.0378913	1.37	0.17	0.979065	1.12772	1.04663	0.0387466	1.23	0.218	0.973377	1.12539
TGox(64:6)_[M+OAc]1- & TGox(65:2)+Cl-37	-ve	0.996718	0.0242457	-0.14	0.892	0.950312	1.04539	0.984523	0.0247673	-0.62	0.535	0.937157	1.03428
TGox(66:8)+Cl-35	-ve	1.04121	0.0414202	1.02	0.31	0.963111	1.12564	1.05754	0.0432545	1.37	0.171	0.976069	1.1458
