# Supplementary material for: Altered triglyceride and phospholipid metabolism predates the diagnosis of gestational diabetes in obese pregnancy
Source: Royal Society of Chemistry journal article supplement (doi:10.1039/c9mo00117d), 2019-10-10
Supplement: c9mo00117d3.xlsx [file c9mo00117d3.xlsx]

## Sheet: Mol% composition (for figure)
	LPC_(16:0)_H	LPC_(18:1)_H	LPC_(18:1)_OAc	LPS_(22:0)_H-	PC_(40:7)_H	PIP_(52:4)_H--	SM_(32:1)_H	PS(37:3(OH))_H-	PS(39:3(OH))_H-	PS_(44:9)_H-	PC_(36:5)_Cl	PC_(36:5)_H	PC_(40:10)_H	PC_(40:10)_OAc	PC_(35:2)_H	PE-O_(36:5)_H-	PC-P_(34:0)_H	PC-P_(40:3)_H	PC_(38:5)_Cl	PC_(38:5)_H	PE_(34:0)_H-	PC-O_(34:1)_H	PE_(38:2)_H	PC-O_(40:4)_H	SM_(41:2)_H	SM_(42:3)_H	TG_(46:5)_NH4	TG_(48:4)_NH4	TG_(48:6)_NH4	TG_(53:4)_NH4	TG_(50:2)_NH4	TG_(48:0)_NH4	TG_(50:1)_NH4	TG_(51:5)_NH4
	Found	Found	Not Found	Not Found	Found	Not Found	Found	Found	Found	Not Found	Not Found	Found	Found	Found	Found	Found	Found	Found	Found	Found	Found	Found	Found	Found	Found	Found	Found	Found	Found	Found	Found	Found	Found	Found
Sample run number	Mol%	Mol%	Mol%	Mol%	Mol%	Mol%	Mol%	Mol%	Mol%	Mol%	Mol%	Mol%	Mol%	Mol%	Mol%	Mol%	Mol%	Mol%	Mol%	Mol%	Mol%	Mol%	Mol%	Mol%	Mol%	Mol%	Mol%	Mol%	Mol%	Mol%	Mol%	Mol%	Mol%	Mol%
001	4.54068	0.60042	0	0	0.873406	0	1.95363	0	0	0	0	11.3445	0	0	1.84567	1.00403	0	0	0.00957894	2.90579	0	1.01883	0	0.0279062	1.12061	0	0	0.118906	0.0108151	0.241407	33.7106	2.28787	34.4399	1.94539
002	12.5005	1.96825	0	0	2.80023	0	5.10186	0	0	0	0	21.4998	0.0234733	0	4.01541	2.05635	0.0523727	0.0266108	0.00698441	7.72068	0	2.68706	0	0.343765	2.11003	0.0176667	0	0.0414304	0	0.199049	16.4588	1.53341	17.8146	1.02159
003	7.84064	1.34955	0	0	1.94232	0	3.98673	0	0	0	0	19.2802	0	0	2.49902	1.99583	0.071331	0	0	7.32697	0	3.08963	0.11657	0.329132	2.1997	0.0180531	0	0.0339806	0	0.138024	21.3935	2.3819	22.6778	1.32921
004	8.93106	1.42274	0	0	2.50167	0	5.63896	0	0	0	0	23.2637	0	0	4.67695	2.72046	0.0247956	0	0	8.11394	0	2.72256	0	0.27491	3.03722	0.0253518	0	0.0518627	0	0.218947	15.1544	2.3416	17.5383	1.3406
005	7.93707	1.33567	0	0	1.90434	0	2.76311	0	0.0580426	0	0	11.858	0.0123655	0	2.13295	0.700504	0.00969947	0	0	4.52731	0	1.66511	0	0.253547	1.4165	0	0	0.0805262	0.00881997	0.127916	34.8843	1.90856	25.0489	1.36679
006	15.8326	3.68968	0	0	2.16627	0	4.4697	0	0	0	0	30.0107	0	0	3.84468	2.28367	0.0393885	0	0	9.44421	0	5.33486	0	0.436925	2.02084	0	0	0.01412	0	0.0903612	9.18607	1.32731	9.22928	0.579364
007	3.92708	0.352694	0	0	0	0	0.694114	0	0	0	0	3.6502	0	0.0550454	0.268524	0	0	0	0	0.639494	0	0	0	0	0	0	0	0.0278559	0	0.0451791	24.0472	10.5624	51.6505	4.0797
008	15.0304	2.77255	0	0	2.13924	0	6.4681	0	0	0	0	31.0924	0	0	6.88253	1.13168	0.0396169	0	0	10.811	0	3.52305	0	0.260894	3.51452	0	0	0.0151748	0	0.151718	6.55232	1.36104	7.72832	0.525426
009	13.1968	2.448	0	0	3.79806	0	4.23675	0	0	0	0	23.8914	0.0195549	0	4.05954	2.32413	0.0430879	0	0	9.10129	0	3.05742	0	0.221032	2.37679	0	0	0.0558408	0	0.293668	15.4134	1.4088	13.2038	0.850639
010	16.9243	2.72729	0	0	3.54988	0	3.15692	0	0	0	0	20.6432	0	0	3.8552	1.74936	0.0297992	0	0	6.71691	0	2.60446	0	0.42803	2.28983	0	0.0101087	0.232063	0.00499944	0.28217	15.7261	1.2985	16.7804	0.99052
011	11.7701	1.88604	0	0	2.38033	0	3.29212	0	0	0	0	19.9036	0	0	3.01416	1.33323	0.0416521	0	0	6.27471	0	2.98193	0	0.387245	2.14308	0.0360902	0.0471897	0.53173	0.00991899	0.323328	23.0273	0.950276	18.7961	0.869971
012	11.0405	1.64153	0	0	2.19527	0	5.66242	0	0	0	0	19.7852	0	0	4.93973	1.0959	0.0626701	0	0	6.36815	0	2.33805	0	0.333366	3.03096	0	0	0.00664882	0	0.211551	17.2221	2.18776	20.4433	1.43484
013	10.5255	2.52481	0	0	3.10585	0	5.93774	0	0	0	0	26.6579	0	0	4.88497	1.20477	0	0	0	10.4702	0	3.60756	0	0.287287	2.5314	0	0	0.064569	0.00533813	0.0790505	13.446	1.25521	12.5173	0.894542
014	9.41421	1.61581	0	0	2.45888	0	6.1514	0	0	0	0	26.4386	0	0	4.4967	2.72307	0.100903	0	0	8.79357	0	3.97999	0	0.514121	2.57685	0.0104144	0	0.0754601	0	0.20468	17.7775	0.854929	11.1417	0.671248
015	13.1639	1.65544	0	0	1.60221	0	2.83826	0.0455045	0	0	0	17.6256	0	0	2.09193	1.23037	0	0.014207	0	5.32173	0	1.35478	0	0.0536864	1.42722	0.0138442	0	0.0482107	0.00885647	0.154454	24.9471	1.51777	23.7872	1.09777
016	5.6527	0.992497	0	0	1.63755	0	4.35634	0	0	0	0	14.6707	0	0	2.51958	2.66432	0	0	0	5.21722	0.0868624	2.33288	0	0.131764	2.30709	0.0235352	0	0.305914	0	0.240992	25.0235	2.09752	27.9506	1.78841
017	14.7034	2.06566	0	0	2.42828	0	4.42963	0	0	0	0	18.9025	0	0	3.13793	1.15101	0.0239282	0.0393626	0	4.54342	0	1.42586	0	0.0580811	1.52933	0	0	0.105218	0	0.210094	19.0061	2.4559	22.2631	1.52114
018	10.3339	1.41136	0	0	3.32746	0	4.42392	0	0	0	0	23.6195	0.0217625	0	4.16782	1.65994	0.0720277	0	0	7.85143	0	2.89677	0	0.22705	2.60942	0	0	0.0266143	0	0.219673	18.7229	1.07053	16.367	0.970992
019	16.6454	2.82865	0	0	1.73395	0	5.40607	0	0	0	0	20.3689	0	0	4.95437	0.950597	0	0	0	6.92025	0	2.30518	0	0.137514	2.66174	0	0	0.0629949	0.00486851	0.159272	13.1934	1.69736	18.8224	1.14711
020	11.5079	2.25278	0	0	1.9224	0	4.8338	0	0	0	0	22.932	0.0191488	0	3.58563	1.86593	0.0403789	0	0.00736628	7.28027	0	3.7906	0	0.377058	2.28416	0.0181751	0	0.0611546	0.00632985	0.162502	15.4534	2.07201	18.3779	1.14912
021	5.02023	0.952104	0	0	1.43878	0	0.465333	0	0.0156713	0	0	7.24963	0	0	1.32338	0.444694	0.0215143	0	0	3.20132	0	1.11147	0	0.155771	0.698289	0.0117413	0	0.165971	0.0107053	0.534595	49.2966	0.627667	26.4643	0.79019
023	7.47417	1.17852	0	0	2.44686	0	2.06964	0	0	0	0	23.0861	0	0	2.24158	5.59031	0.0429106	0	0	5.2665	0	1.75288	0	0.319286	1.28567	0.0393969	0	0.0224211	0	0.163425	21.0122	1.18359	23.6022	1.22239
024	13.1554	2.8309	0	0	1.47556	0	5.73283	0	0	0	0	24.9476	0	0	4.54111	1.17531	0.0277396	0	0	9.48401	0	3.0198	0	0.0860484	2.49252	0	0	0	0	0.0867923	12.4953	1.5848	15.8286	1.03574
025	13.0982	2.07149	0	0	4.28343	0	5.12004	0	0.118736	0	0	28.1782	0	0	4.80349	3.86808	0.140241	0	0.00747182	7.00574	0	4.002	0	0.533986	3.30891	0	0	0.0542187	0	0.278471	9.17602	1.79867	11.4159	0.736655
026	15.5968	2.83904	0	0	2.45176	0	6.28122	0	0	0	0	20.607	0	0	4.84812	1.3759	0.0434815	0.0327539	0	9.6207	0	3.02746	0	0.32676	2.76631	0.024601	0	0.0198056	0	0.0911266	13.6698	1.03487	14.5288	0.813745
027	7.7694	1.1567	0	0	2.7562	0	2.57091	0	0	0	0	15.6552	0	0	2.87917	4.14083	0.0180181	0	0	6.11874	0	2.01649	0	0.182754	1.83969	0	0	0.0224719	0	0.287236	16.916	2.04787	32.0345	1.58777
028	14.7434	3.2887	0	0	3.0149	0	4.2665	0	0.0642003	0	0	17.8856	0	0	4.97279	1.3179	0.0212586	0	0	8.96395	0	2.89131	0	0.327126	2.56633	0.0115563	0	0.0533539	0	0.139518	15.289	1.25444	17.8057	1.12244
030	15.5932	2.52113	0	0	3.85522	0	6.62122	0	0	0	0	29.157	0	0	5.8692	3.50007	0.0238449	0	0	9.91435	0	4.32053	0	0.431189	3.38269	0.0696648	0	0.0127456	0	0.119924	6.01573	1.17457	6.99108	0.426582
031	6.16078	0.970445	0	0	1.67927	0	2.28597	0	0	0	0	21.032	0.0213301	0	3.24916	1.31549	0.0720912	0.0105741	0	6.48279	0	2.57959	0	0.258731	1.37917	0.0132918	0	0.112723	0.00579252	0.263132	29.614	1.23635	20.4118	0.845547
033	12.5703	1.3572	0	0	2.63044	0	4.8164	0	0	0	0	24.3687	0	0	5.82089	2.16408	0	0	0	8.83816	0	2.82849	0	0.0396023	2.41308	0	0	0.0524938	0	0.205305	13.3019	2.09273	15.2956	1.20458
035	46.4434	6.89568	0	0	0.162158	0	6.65064	0	0	0	0	4.31862	0	0	0.703548	0	0	0.0326176	0	0.802102	0	0.43479	0	0	0.469129	0	0	0.0303705	0	0.0695334	11.3803	4.02504	16.5372	1.04483
